# Supplementary material
Source: MDPI journal article supplement (https://www.mdpi.com/2311-7524/9/8/850)
Supplement: s1 [file s1]

Archive with 2 entries (2 files):
- supplementary figures.pdf
- Supplementary tables-revised.xlsx
