# Supplementary material
Source: MDPI journal article supplement (https://www.mdpi.com/2311-7524/9/8/850)
Supplement: s1 [file s1 › supplementary figures.pdf]

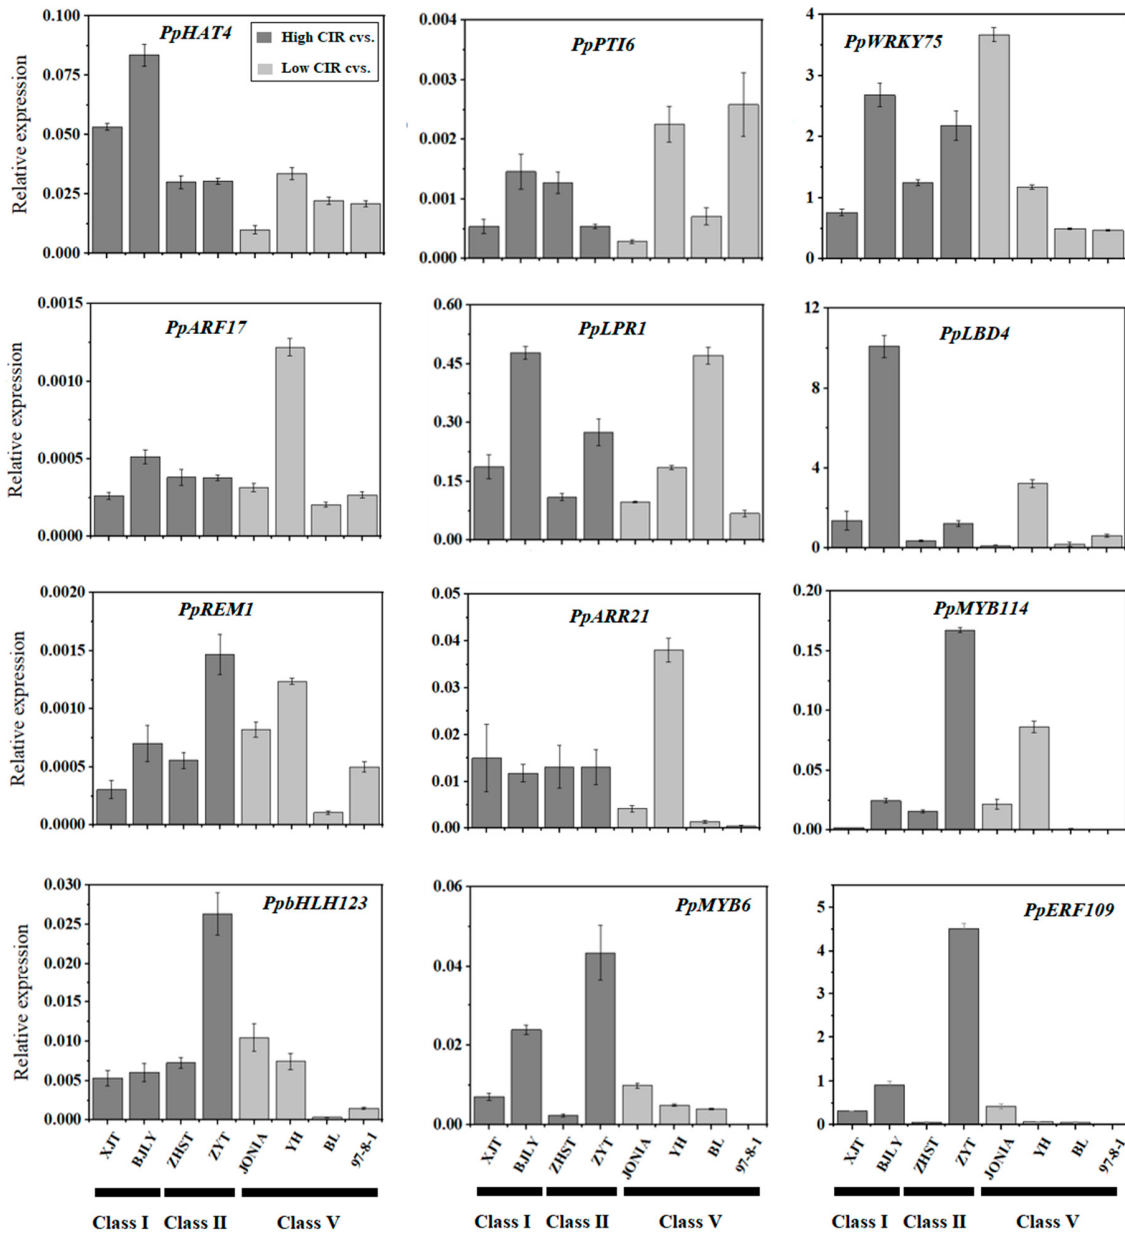

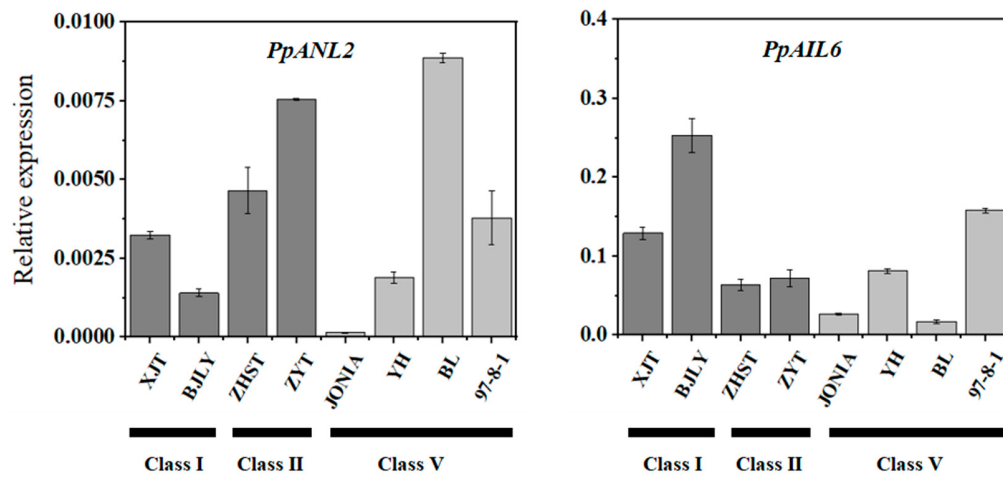

**Figure S1.** Expression levels of candidate genes that associated with callus adventitious rooting in the cotyledon-derived callus. The genes expression as determined by qRT-PCR.

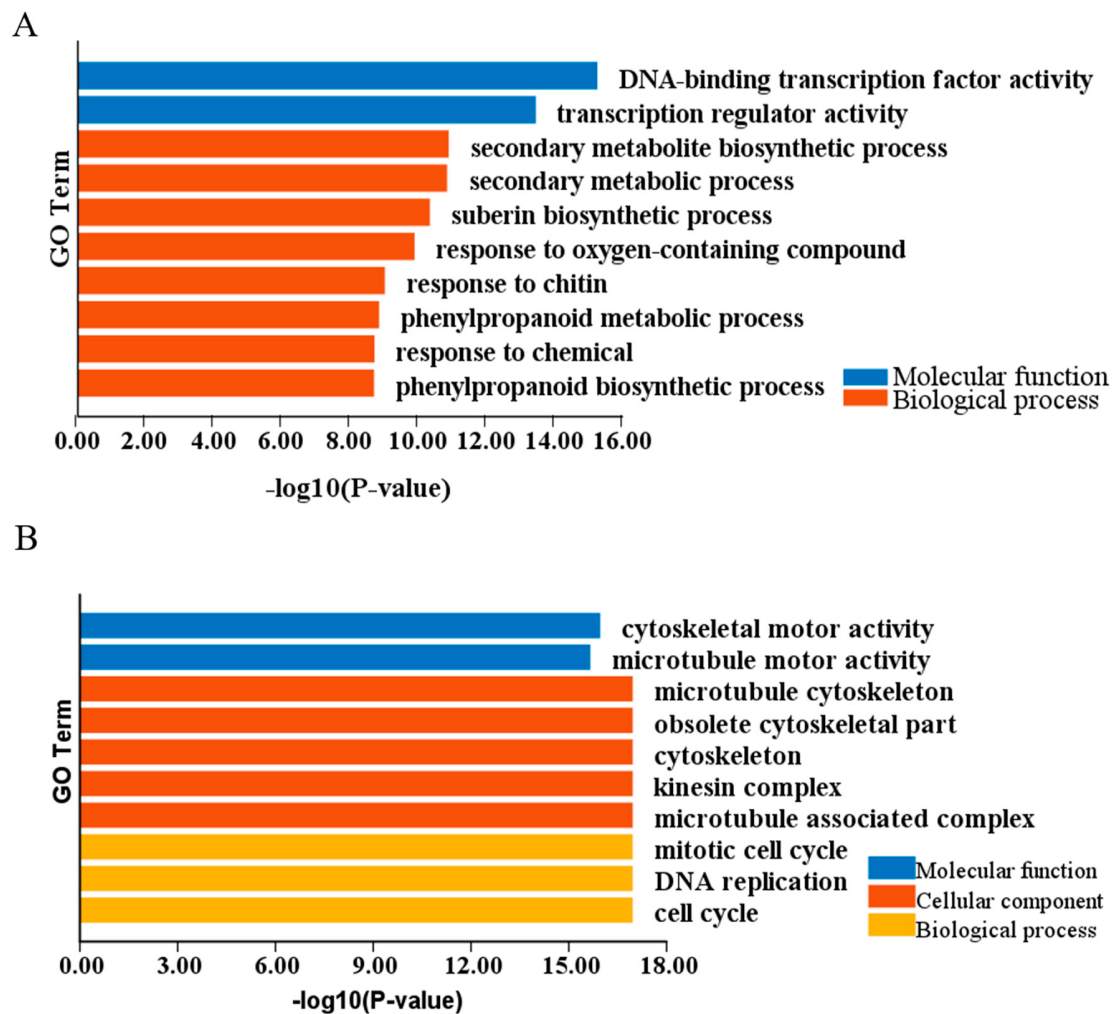

**Figure S2.** Gene ontology (GO) enrichment. **(A)** Ten enriched GO terms were identified by based on 1621 up-regulated DEGs. **(B)** Ten enriched GO terms were identified by based on 1120 down-regulated DEGs.
