# Supplementary material
Source: MDPI journal article supplement (https://www.mdpi.com/2311-7524/9/8/850)
Supplement: s1 [file s1 › Supplementary tables-revised.xlsx]

## Sheet: Table S1
	Table S1. Peach germplasm used in this study.
		Number	Variety	classification	mature period	Roooting (yes or no)	Callus induction rate(Average)
	Class I	1	XJT	peach	August	Yes	1.3456
		2	BJLY	Nectarine	August	No	1.0899
	Class II	3	ZHST	peach	October	Yes	0.945
		4	QZBPMT	peach	September	Yes	0.9269
		5	ZYT	Nectarine	August	Yes	0.9035
		6	LGLT	peach	August	No	0.8937
		7	LH	peach	August	No	0.8935
		8	98-10-28	Nectarine	July	No	0.8826
		9	ZHBT	peach	September	Yes	0.8563
		10	3-3-9	Nectarine	September	Yes	0.8397
		11	ROMESTAH	peach	July	No	0.8172
		12	KHZM	peach	September	Yes	0.7991
		13	JT5	peach	August	No	0.7922
		14	VⅡ-LADORIO	Nectarine	August	No	0.7719
		15	SIRIO	Nectarine	September	Yes	0.7572
	Class III	16	GHT	peach	August	Yes	0.6794
		17	QQ	peach	August	Yes	0.6768
		18	RP5	peach	July	No	0.6717
		19	SG	Nectarine	June	Yes	0.6665
		20	BJ33	peach	August	No	0.6453
		21	RP4	peach	August	No	0.6425
		22	RBY2	Nectarine	July	No	0.5854
		23	BCB	peach	July	Yes	0.5739
		24	98-14-4	Nectarine	July	No	0.5656
		25	NECTAHOSS	peach	July	Yes	0.5191
		26	MX	peach	July	No	0.5112
		27	AZQH	Nectarine	July	No	0.5082
		28	CY	peach	August	Yes	0.4859
		29	JYYB	peach	August	No	0.4689
		30	SLHR	peach	September	Yes	0.4628
		31	FX2001	peach	July	Yes	0.4562
		32	HL	peach	July	No	0.4464
		33	3-1-43	Nectarine	September	Yes	0.4342
		34	GHPA ROSSA	Nectarine	June	No	0.4303
		35	ZB	peach	September	Yes	0.4281
		36	LSM	peach	August	Yes	0.4191
		37	ZYP3	peach	August	No	0.4159
		38	FCB	peach	July	No	0.4095
		39	MGT	peach	September	No	0.405
		40	MGWY	Nectarine	July	Yes	0.4024
	Class IV	41	SZSM	peach	August	No	0.3979
		42	MW	Nectarine	July	No	0.3929
		43	WSH	Nectarine	September	Yes	0.3802
		44	TTW	peach	June	No	0.3708
		45	SHSM	peach	August	No	0.3693
		46	RBT	peach	August	Yes	0.3651
		47	97-8-4	peach	July	Yes	0.3635
		48	HFR	Nectarine	July	Yes	0.3399
		49	RBHT	Nectarine	July	No	0.3094
		50	YQ	Nectarine	August	Yes	0.3081
		51	ZYP2	Nectarine	July	No	0.2586
		52	LX	Nectarine	July	No	0.2525
		53	4-3-3	Nectarine	July	No	0.2505
		54	HMX	peach	August	Yes	0.2406
		55	QL	Nectarine	September	No	0.2357
		56	95-2-30	peach	July	No	0.2082
	Class V	57	PADANA	peach	July	Yes	0.1819
		58	RG28	Nectarine	June	No	0.1777
		59	HW	peach	August	No	0.1694
		60	ORION	Nectarine	August	No	0.1671
		61	SGYH	peach	August	No	0.1551
		62	ZH	peach	July	No	0.1207
		63	QG2	Nectarine	July	No	0.1179
		64	RG19	Nectarine	July	No	0.0968
		65	BH	peach	August	No	0.0955
		66	21SJ	Nectarine	August	No	0.0815
		67	HY	peach	August	No	0.076
		68	JONIA	peach	August	No	0.0477
		69	YH	peach	August	No	0.0396
		70	MQ	Nectarine	July	No	0.0357
		71	BL	peach	July	No	0.0335
		72	97-8-1	peach	July	No	0.0329
		73	BJ8	peach	July	No	0.0212
	Class VI	74	CZBF	peach	July	/	0
		75	HY	Nectarine	July	/	0
		76	GBTT	Nectarine	July	/	0
		77	JCYW	Nectarine	July	/	0
		78	FX	peach	July	/	0
		79	ZHPT	peach	June	/	0
		80	WPT	peach	July	/	0
		81	CM	peach	June	/	0
		82	LC	Nectarine	June	/	0
		83	ZY4	Nectarine	June	/	0
		84	ZHZ	Nectarine	June	/	0
		85	ZH2	Nectarine	June	/	0
		86	HSX	Nectarine	June	/	0
		87	XSH	Nectarine	July	/	0
		88	FH	peach	July	/	0
		89	ZX	peach	June	/	0
		90	YHL	peach	June	/	0
		91	WM	peach	August	/	0
		92	JZH	peach	July	/	0
		93	SZZS	Nectarine	June	/	0
		94	QW	peach	August	/	0
		95	QJBT	peach	July	/	0
		96	MX	peach	August	/	0
		97	JY	peach	August	/	0
		98	JC	peach	June	/	0
		99	JNY	peach	June	/	0
		100	HQS	peach	July	/	0
		Note: '/' means these cultivars not yet induced callus

## Sheet: Table S2
	Table S2. Transcriptome sequencing data in Prunus persica L.
	Sample	Biological replication	Raw Reads	# clean reads	Clean Base(G)	GC%	Q20(%)	Q30(%)
	CC3W-ZYT	Y0-1a	45663052	42559350	6.38	45.84	98.37	94.93
		Y0-1b	51735788	49978488	7.5	45.52	97.51	93.08
		Y0-1c	46892070	45391062	6.81	45.52	97.71	93.53
	Total			137928900	20.69
	CC6WR-ZYT	Y0-2a	46565178	44918308	6.74	45.35	97.59	93.23
		Y0-2b	48791450	47193242	7.08	45.2	97.74	93.57
		Y0-3c	49721412	48205330	7.23	45.31	97.64	93.34
	Total			140316880	21.05
	CC5Y	Y0-3a	49037356	46654882	7	45.53	98.01	94.15
		Y0-3b	46037274	44134088	6.62	45.39	97.99	94.16
		Y0-3c	47497156	45581672	6.84	45.53	97.95	94.03
	Total			136370642	20.46
	CC3W-ZH	Y0-4a	43718170	42391404	6.36	45.23	97.85	93.7
		Y0-4b	45622374	43722150	6.56	45.01	97.91	93.82
		Y0-4c	48440278	45298678	6.79	45.2	98.14	94.44
	Total			131412232	19.71
	CC6WR-ZH	Y0-5a	46950426	43637038	6.55	45.71	97.36	92.49
		Y0-5b	46454566	44537966	6.68	45.57	97.92	93.85
		Y0-5c	47986360	45800002	6.87	45.43	98.09	94.26
	Total			133975006	20.1
	CC3W-QQ	Y0-6a	47479328	45328052	6.8	45.66	97.79	93.58
		Y0-6b	45828260	43574968	6.54	45.71	97.97	94.04
		Y0-6c	48937810	46513058	6.98	45.73	98.14	94.46
	Total			135416078	20.32
	CC6WR-QQ	Y0-7a	48446866	46137016	6.92	45.45	98.05	94.2
		Y0-7b	48054654	46228606	6.93	45.4	98.11	94.31
		Y0-7c	49584060	47666918	7.15	45.42	98.17	94.39
	Total			140032540	21

## Sheet: Table S3
	Table S3. Statistics of transcriptome reference sequence alignment.
	Sample	Biological replication	Total Reads	Reads mapped(%)	Unique mapped(%)	Multi mapped(%)
	CC3W-ZYT	Y0-1a	42559350	41082014(96.53%)	40114531(94.26%)	1471424(2.27%)
		Y0-1b	49978488	47910279(95.86%)	46823956(93.69%)	1616275(2.17%)
		Y0-1c	45391062	43628185(96.12%)	42637778(93.93%)	1496855(2.18%)
	Average			44206826(96.17%)	43192088(93.96%)	1528185(2.21%)
	CC6WR-ZYT	Y0-2a	44918308	43110095(95.97%)	42161902(93.86%)	1420840(2.11%)
		Y0-2b	47193242	45400261(96.20%)	44400261(94.08%)	1524734(2.12%)
		Y0-2c	48205330	46337203(96.12%)	45297251(93.97%)	1566677(2.16%)
	Average			44949186(96.10%)	43953138(93.97%)	1504084(2.13%)
	CC5Y	Y0-3a	46654882	44459414(95.29%)	43426652(93.08%)	1632357(2.21%)
		Y0-3b	44134088	42051655(95.28%)	41076245(93.07%)	1550731(2.21%)
		Y0-3c	45581672	43507040(95.45%)	42500159(93.24%)	1607796(2.21%)
	Average			43339370(95.34%)	42334352(93.13%)	1596961(2.21%)
	CC3W-ZH	Y0-4a	42391404	40734883(96.09%)	39873404(94.06%)	1232262(2.03%)
		Y0-4b	43722150	41904128(95.84%)	41001614(93.78%)	1294782(2.06%)
		Y0-4c	45298678	43405741(95.82%)	42489271(93.80%)	1303736(2.02%)
	Average			42014917(95.52%)	41121429(93.88%)	1276926(2.02%)
	CC6WR-ZH	Y0-5a	43637038	41950379(96.13%)	40967468(93.88%)	1447117(2.25%)
		Y0-5b	44537966	42760398(96.01%)	41756863(93.76%)	1464521(2.25%)
		Y0-5c	45800002	44052299(96.18%)	43010249(93.91%)	1574055(2.28%)
	Average			42921025(96.11%)	41911526(93.85%)	1495231(2.26%)
	CC3W-QQ	Y0-6a	45328052	43403595(95.75%)	42373823(93.48%)	1580297(2.27%)
		Y0-6b	43574968	41739421(95.79%)	40763087(93.55%)	1478171(2.24%)
		Y0-6c	46513058	44645088(95.98%)	43582797(93.70%)	1667684(2.28%)
	Average			43262701(98.54%)	42239902(93.58%)	1575384(2.26%)
	CC6WR-QQ	Y0-7a	46137016	44395515(96.23%)	43480477(94.24%)	1388576(1.98%)
		Y0-7b	46228606	44519248(96.30%)	43601524(94.32%)	1375659(1.99%)
		Y0-7c	47666918	45923628(96.34%)	44971526(94.35%)	1468659(2.00%)
	Average			44946130(96.29%)	44017842(94.30%)	1410964(1.99%)

## Sheet: Table S4
Table S4. Total 2741 DEGs were divided into up- and down-regulated according to log2FC.
	Gene ID	CC3W-ZYT vs. CC5Y	CC6W-ZYT vs. CC5Y	CC3W-ZH vs. CC5Y	CC6W-ZH vs. CC5Y	CC3W-QQ vs. CC5Y	CC6W-QQ vs. CC5Y			Gene ID	CC3W-ZYT vs. CC5Y	CC6W-ZYT vs. CC5Y	CC3W-ZH vs. CC5Y	CC6W-ZH vs. CC5Y	CC3W-QQ vs. CC5Y	CC6W-QQ vs. CC5Y
UP-regulated	Prupe.3G104100	6.663	6.922	9.084	8.038	5.948	6.831		Down-regulated	Prupe.6G203000	-2.289	-3.116	-5.416	-4.116	-2.484	-2.779
UP-regulated	Prupe.6G091100	2.325	1.262	1.65	1.579	1.407	1.322		Down-regulated	Prupe.1G507000	-2.686	-2.911	-3.078	-2.554	-2.034	-2.249
UP-regulated	Prupe.7G039600	3.174	2.397	4.027	4.165	4.106	4.342		Down-regulated	Prupe.4G178100	-6.124	-2.689	-3.356	-2.692	-5.981	-3.463
UP-regulated	Prupe.1G030500	14.727	14.955	6.945	12.171	12.99	13.118		Down-regulated	Prupe.4G178300	-3.308	-4.315	-3.227	-2.256	-4.146	-4.071
UP-regulated	Prupe.1G074400	6.742	6.534	1.538	6.303	5.024	5.658		Down-regulated	Prupe.4G178400	-2.514	-3.125	-1.893	-2.625	-2.16	-2.136
UP-regulated	Prupe.1G304900	11.483	9.372	11.129	11.082	9.834	10.161		Down-regulated	Prupe.6G038900	-1.619	-1.676	-1.604	-2.399	-1.025	-1.541
UP-regulated	Prupe.2G190100	3.491	3.527	1.286	2.35	2.41	2.044		Down-regulated	Prupe.7G144200	-8.553	-8.58	-5.215	-3.072	-8.41	-8.755
UP-regulated	Prupe.2G195300	11.665	10.959	6.701	8.813	6.764	8.399		Down-regulated	Prupe.8G122600	-2.554	-2.645	-6.014	-8.779	-5.756	-1.647
UP-regulated	Prupe.2G230000	5.872	5.99	7.059	6.278	5.714	5.309		Down-regulated	Prupe.8G122700	-4.197	-4.724	-3.817	-3.714	-7.733	-5.226
UP-regulated	Prupe.3G064500	7.124	5.065	7.378	6.967	3.556	7.012		Down-regulated	Prupe.1G263800	-2.043	-2.446	-2.364	-2.935	-1.882	-1.68
UP-regulated	Prupe.3G179800	4.422	4.746	5.927	4.882	2.448	4.519		Down-regulated	Prupe.2G286000	-1.221	-1.563	-2.066	-2.548	-0.876	-1.869
UP-regulated	Prupe.4G196600	9.038	7.194	7.927	7.736	4.991	6.963		Down-regulated	Prupe.7G039800	-7.877	-8.025	-7.483	-5.619	-2.39	-11.659
UP-regulated	Prupe.5G035400	3.158	3.323	2.03	4.01	2.025	3.021		Down-regulated	Prupe.7G039900	-6.225	-8.11	-8.19	-6.247	-1.276	-8.284
UP-regulated	Prupe.5G175200	9.797	10.836	4.837	8.139	8.003	8.642		Down-regulated	Prupe.7G040100	-8.75	-8.83	-7.024	-5.82	-2.243	-9.327
UP-regulated	Prupe.6G211900	10.532	10.668	9.401	6.259	7.708	8.1		Down-regulated	Prupe.7G070200	-1.81	-2.508	-2.828	-2.58	-2.426	-1.248
UP-regulated	Prupe.6G212000	12.381	12.675	7.501	9.404	9.176	10.833		Down-regulated	Prupe.7G191100	-2.107	-1.976	-3.287	-2.634	-2.036	-2.166
UP-regulated	Prupe.6G289300	10.095	10.959	11.889	10.7	7.293	12.666		Down-regulated	Prupe.8G157500	-2.985	-2.288	-2.141	-2.15	-2.491	-1.607
UP-regulated	Prupe.6G329600	1.247	1.414	1.365	1.391	2.107	3.08		Down-regulated	Prupe.8G243500	-2.797	-2.245	-4.698	-4.385	-2.03	-1.93
UP-regulated	Prupe.7G207500	10.825	11.04	6.682	8.866	8.79	8.774		Down-regulated	Prupe.5G211200	-1.232	-0.927	-5.46	-2.515	-5.209	-5.554
UP-regulated	Prupe.7G225800	6.694	6.155	8.013	6.927	4.82	7.905		Down-regulated	Prupe.6G041400	-1.958	-2.685	-3.159	-2.221	-0.946	-2.151
UP-regulated	Prupe.7G260800	1.682	1.598	1.902	1.979	1.92	1.549		Down-regulated	Prupe.5G201400	-1.911	-1.253	-2.309	-1.951	-1.63	-1.135
UP-regulated	Prupe.1G298200	5.476	3.606	8.55	7.142	5.181	5.708		Down-regulated	Prupe.6G035400	-3.925	-3.454	-1.953	-2.022	-4.058	-3.301
UP-regulated	Prupe.1G361100	1.772	2.95	4.179	2.989	1.841	2.49		Down-regulated	Prupe.8G228000	-6.911	-5.763	-6.404	-8.923	-8.761	-7.106
UP-regulated	Prupe.1G374400	1.635	1.795	3.014	2.642	2.229	2.359		Down-regulated	Prupe.1G019100	-1.281	-2.136	-2.47	-2.628	-2.634	-1.175
UP-regulated	Prupe.1G478400	4.053	2.032	3.225	3.1	3.612	2.741		Down-regulated	Prupe.1G473800	-1.736	-1.85	-3.097	-2.571	-1.812	-1.641
UP-regulated	Prupe.1G508100	6.349	4.669	7.394	6.241	3.769	7.843		Down-regulated	Prupe.3G078800	-1.247	-1.475	-2.141	-2.432	-0.968	-1.807
UP-regulated	Prupe.3G246000	8.104	10.01	11.846	10.328	8.69	9.86		Down-regulated	Prupe.6G340600	-2.113	-3.209	-3.44	-3.18	-2.538	-1.906
UP-regulated	Prupe.6G217300	3.623	1.332	2.366	2.785	2.741	2.939		Down-regulated	Prupe.5G173100	-3.759	-3.77	-7.309	-5.4	-5.202	-1.945
UP-regulated	Prupe.7G160600	1.942	1.734	1.554	1.24	1.696	1.277		Down-regulated	Prupe.5G180000	-2.489	-2.745	-4.322	-3.795	-2.337	-1.939
UP-regulated	Prupe.8G091600	2.217	2.547	2.828	3.083	2.603	2.399		Down-regulated	Prupe.6G253200	-2.571	-2.497	-5.686	-3.143	-2.94	-1.805
UP-regulated	Prupe.1G341000	8.947	9.347	9.389	9.462	7.735	10.191		Down-regulated	Prupe.1G390800	-3.627	-3.225	-3.664	-1.983	-0.933	-2.279
UP-regulated	Prupe.1G341100	4.024	4.573	3.878	4.516	4.207	4.194		Down-regulated	Prupe.2G183200	-7.125	-2.039	-2.565	-3.297	-6.982	-2.473
UP-regulated	Prupe.1G424300	2.642	2.806	2.283	4.003	2.198	2.993		Down-regulated	Prupe.3G096000	-2.179	-2.245	-6.031	-4.894	-7.982	-1.179
UP-regulated	Prupe.3G048600	1.45	2.493	2.5	2.119	1.497	2.031		Down-regulated	Prupe.6G284400	-2.44	-2.704	-4.863	-4.832	-2.374	-2.917
UP-regulated	Prupe.5G239100	10.47	10.73	12.234	10.773	9.27	11.004		Down-regulated	Prupe.3G060900	-1.592	-7.249	-3.472	-2.387	-2.219	-1.313
UP-regulated	Prupe.6G060000	2.019	1.825	3.81	2.523	1.538	3.16		Down-regulated	Prupe.1G325000	-3.46	-4.488	-5.479	-5.862	-7.483	-3.494
UP-regulated	Prupe.6G238500	4.205	4.893	4.572	4.746	3.728	4.807		Down-regulated	Prupe.1G447100	-1.266	-3.089	-2.626	-2.964	-3.683	-1.462
UP-regulated	Prupe.6G249300	5.674	6.125	2.1	6.551	5.577	5.84		Down-regulated	Prupe.3G015300	-7.782	-9.668	-4.643	-2.996	-3.94	-4.526
UP-regulated	Prupe.6G260600	2.292	3.097	2.486	2.333	2.152	1.926		Down-regulated	Prupe.3G218500	-2.743	-3.238	-4.92	-1.3	-4.675	-2.015
UP-regulated	Prupe.8G142400	4.398	4.359	2.609	5.747	4.35	4.333		Down-regulated	Prupe.5G064300	-2.953	-2.694	-2.336	-2.191	-1.07	-1.976
UP-regulated	Prupe.8G234800	8.985	9.917	9.31	8.006	7.862	9.539		Down-regulated	Prupe.2G146600	-2.047	-3.969	-3.636	-3.458	-1.578	-1.687
UP-regulated	Prupe.2G251000	2.919	3.405	2.191	4.533	2.236	3.492		Down-regulated	Prupe.4G138200	-3.953	-3.38	-3.828	-2.69	-2.811	-3.029
UP-regulated	Prupe.6G056300	1.628	1.822	1.228	1.597	1.502	1.183		Down-regulated	Prupe.8G227300	-3.063	-1.382	-1.697	-2.048	-1.896	-1.309
UP-regulated	Prupe.7G239900	2.277	2.831	1.059	1.695	2.358	2.071		Down-regulated	Prupe.8G227500	-2.571	-3.516	-6.694	-5.677	-6.15	-1.693
UP-regulated	Prupe.1G093900	3.122	2.915	3.193	2.385	2.09	2.615		Down-regulated	Prupe.2G287500	-1.984	-1.48	-1.252	-1.673	-2.621	-1.229
UP-regulated	Prupe.3G245100	9.18	10.116	10.099	8.66	8.765	10.738		Down-regulated	Prupe.3G170600	-3.683	-4.637	-3.248	-3.385	-1.431	-4.019
UP-regulated	Prupe.5G221000	6.261	8.193	10.673	10.093	8.543	9.954		Down-regulated	Prupe.5G087500	-2.763	-3.742	-2.791	-2.879	-5.838	-2.432
UP-regulated	Prupe.2G233600	7.211	7.155	7.159	6.448	6.437	7.523		Down-regulated	Prupe.7G164100	-3.078	-4.269	-4.685	-4.16	-5.334	-3.427
UP-regulated	Prupe.4G042500	11.142	10.29	9.92	11.28	7.959	9.972		Down-regulated	Prupe.3G111300	-1.88	-1.881	-3.861	-1.893	-1.756	-3.955
UP-regulated	Prupe.4G050300	7.638	8.111	9.071	8.738	6.216	8.094		Down-regulated	Prupe.7G032000	-2.03	-2.195	-3.123	-3.71	-2.323	-2.179
UP-regulated	Prupe.6G079500	6.059	4.699	5.892	5.036	2.166	5.999		Down-regulated	Prupe.1G452000	-1.951	-2.055	-2.371	-2.315	-2.035	-1.626
UP-regulated	Prupe.7G140700	6.07	5.29	7.683	5.923	2.413	6.843		Down-regulated	Prupe.4G215500	-1.857	-1.559	-2.741	-2.542	-0.945	-2.753
UP-regulated	Prupe.3G009400	5.266	1.755	2.067	1.671	2.686	4.867		Down-regulated	Prupe.7G126800	-2.844	-1.512	-5.553	-5.204	-9.48	-1.408
UP-regulated	Prupe.2G129400	11.918	11.147	4.311	7.063	8.439	8.579		Down-regulated	Prupe.3G014900	-1.48	-2.056	-1.6	-2.621	-3.238	-1.951
UP-regulated	Prupe.1G037900	3.488	3.402	1.862	2.856	3.285	2.434		Down-regulated	Prupe.5G241000	-1.558	-1.655	-1.316	-1.946	-1.419	-1.36
UP-regulated	Prupe.1G130300	3.687	2.287	3.912	3.889	2.511	3.202		Down-regulated	Prupe.6G106200	-1.6	-1.028	-1.614	-1.646	-0.808	-1.269
UP-regulated	Prupe.1G545700	5.007	5.307	4.06	4.898	4.633	5.659		Down-regulated	Prupe.5G040400	-3.946	-2.746	-4.84	-4.527	-4.799	-2.422
UP-regulated	Prupe.2G129300	6.947	6.256	3.692	5.507	5.01	5.97		Down-regulated	Prupe.1G226700	-2.909	-2.719	-2.98	-3.471	-2.881	-2.178
UP-regulated	Prupe.2G272400	1.997	2.02	2.21	3.518	1.706	2.537		Down-regulated	Prupe.5G096000	-2.932	-2.703	-6.963	-6.874	-2.543	-3.193
UP-regulated	Prupe.2G289600	10.572	10.167	3.372	8.101	9.959	8.467		Down-regulated	Prupe.3G124900	-4.986	-3.578	-3.701	-3.757	-1.712	-4.286
UP-regulated	Prupe.3G032300	1.816	1.717	1.728	1.476	1.491	1.631		Down-regulated	Prupe.1G432100	-2.936	-2.523	-3.419	-3.636	-2.73	-1.916
UP-regulated	Prupe.3G157100	3.851	3.332	2.002	2.032	2.499	1.605		Down-regulated	Prupe.4G101100	-3.159	-3.107	-2.235	-1.719	-1.477	-3.004
UP-regulated	Prupe.5G061800	5.421	5.151	3.266	4.481	5.286	4.016		Down-regulated	Prupe.1G003400	-3.273	-5.897	-4.277	-3.524	-1.638	-2.694
UP-regulated	Prupe.5G062000	3.469	3.376	3.312	4.329	3.535	3.413		Down-regulated	Prupe.1G004200	-2.639	-3.902	-3.778	-3.355	-2.608	-2.397
UP-regulated	Prupe.5G065300	3.633	3.596	4.792	3.801	1.667	4.991		Down-regulated	Prupe.1G011700	-3.981	-3.434	-8.363	-7.828	-3.795	-2.832
UP-regulated	Prupe.5G090000	9.97	10.922	9.03	10.982	7.995	10.506		Down-regulated	Prupe.1G012800	-3.457	-2.341	-4.156	-4.051	-2.834	-1.486
UP-regulated	Prupe.5G090100	8.358	8.766	6.039	8.524	6.56	7.373		Down-regulated	Prupe.1G015700	-2.187	-3.005	-4.423	-4.597	-3.548	-1.648
UP-regulated	Prupe.5G213800	4.352	4.515	5.312	4.36	4.354	3.329		Down-regulated	Prupe.1G020400	-3.817	-2.34	-4.703	-3.249	-2.443	-2.32
UP-regulated	Prupe.7G194400	8.041	8.663	6.113	9.973	5.578	8.81		Down-regulated	Prupe.1G022500	-2.472	-3.541	-4.418	-4.155	-2.315	-3.041
UP-regulated	Prupe.8G125100	13.753	14.225	11.403	15.067	12.085	14.135		Down-regulated	Prupe.1G023500	-3.35	-5.259	-5.69	-6.298	-7.288	-4.408
UP-regulated	Prupe.8G224600	5.813	4.992	3.193	3.71	3.375	3.658		Down-regulated	Prupe.1G027500	-1.344	-4.471	-5.416	-5.259	-3.312	-2.112
UP-regulated	Prupe.1G387800	2.602	2.427	0.993	2.018	2.488	1.436		Down-regulated	Prupe.1G033600	-1.175	-1.648	-2.38	-2.477	-1.81	-1.248
UP-regulated	Prupe.1G340500	5.506	5.426	2.906	4.817	4.104	5.026		Down-regulated	Prupe.1G038600	-1.814	-1.775	-2.636	-2.466	-2.222	-2.468
UP-regulated	Prupe.3G027400	1.955	2.172	3.432	2.621	1.737	2.863		Down-regulated	Prupe.1G040300	-2.753	-1.777	-1.307	-1.343	-2.219	-2.383
UP-regulated	Prupe.3G127700	10.59	10.863	12.361	11.002	8.857	12.158		Down-regulated	Prupe.1G042100	-1.555	-2.345	-2.791	-3.349	-2.348	-1.092
UP-regulated	Prupe.3G163500	7.336	7.825	7.948	6.899	6.41	8.088		Down-regulated	Prupe.1G042300	-2.481	-3.111	-4.607	-4.285	-2.652	-1.908
UP-regulated	Prupe.4G128000	9.562	8.429	10.033	8.678	5.486	10.812		Down-regulated	Prupe.1G042500	-3.149	-2.353	-1.482	-2.313	-1.54	-2.444
UP-regulated	Prupe.5G023700	8.665	8.328	6.068	7.962	9.447	7.944		Down-regulated	Prupe.1G044200	-5.621	-5.648	-5.729	-5.639	-4.516	-5.823
UP-regulated	Prupe.5G028400	4.47	4.747	5.368	5.581	3.48	5.555		Down-regulated	Prupe.1G045400	-2.375	-1.15	-6.874	-2.954	-4.759	-2.665
UP-regulated	Prupe.6G254900	2.317	2.098	5.027	5.122	3.197	3.022		Down-regulated	Prupe.1G046100	-1.565	-1.354	-1.163	-1.307	-1.311	-1.599
UP-regulated	Prupe.6G282300	6.207	3.84	4.82	5.941	6.174	4.333		Down-regulated	Prupe.1G051800	-3.898	-3.824	-2.549	-2.622	-4.266	-5.986
UP-regulated	Prupe.6G351000	1.141	1.176	1.377	1.115	1.275	1.017		Down-regulated	Prupe.1G054200	-3.592	-4.813	-5.221	-7.657	-4.743	-2.931
UP-regulated	Prupe.7G075300	3.092	5.222	5.327	5.57	2.602	4.155		Down-regulated	Prupe.1G056600	-2.315	-1.374	-2.984	-2.193	-0.977	-1.806
UP-regulated	Prupe.8G086100	2.695	2.923	1.982	3.085	1.99	2.462		Down-regulated	Prupe.1G062200	-3.124	-1.304	-3.233	-3.144	-2.983	-3.327
UP-regulated	Prupe.3G162500	1.577	1.43	3.006	1.973	1.864	2.138		Down-regulated	Prupe.1G067200	-1.15	-1.046	-1.808	-1.588	-0.929	-1.093
UP-regulated	Prupe.6G073800	2.504	3.206	3.135	3.374	4.013	3.787		Down-regulated	Prupe.1G072800	-2.373	-3.442	-4.05	-3.539	-2.323	-2.78
UP-regulated	Prupe.6G223200	9.878	10.08	10.083	9.651	9.415	8.004		Down-regulated	Prupe.1G078300	-1.915	-1.773	-2.485	-2.095	-1.484	-1.387
UP-regulated	Prupe.6G282800	2.308	2.582	3.757	4.204	3.017	2.403		Down-regulated	Prupe.1G083700	-2.854	-3.314	-5.059	-3.153	-1.076	-4.495
UP-regulated	Prupe.7G236100	1.745	1.955	1.578	1.989	2.477	1.746		Down-regulated	Prupe.1G086500	-2.303	-2.056	-3.378	-3.187	-3.932	-1.487
UP-regulated	Prupe.2G127300	4.832	3.37	5.69	5.064	2.521	6.08		Down-regulated	Prupe.1G088400	-4.098	-1.702	-3.581	-2.765	-6.793	-5.276
UP-regulated	Prupe.2G291400	4.19	4.169	2.672	2.762	5.007	3.839		Down-regulated	Prupe.1G088800	-2.601	-1.516	-3.318	-2.487	-1.845	-2.414
UP-regulated	Prupe.2G004000	1.935	2.004	2.69	2.484	1.807	2.63		Down-regulated	Prupe.1G097600	-2.325	-3.649	-2.93	-4.369	-3.042	-2.447
UP-regulated	Prupe.2G194400	3.361	2.32	2.525	1.693	1.466	1.581		Down-regulated	Prupe.1G104100	-1.684	-3.041	-4.524	-4.138	-3.17	-1.882
UP-regulated	Prupe.5G029000	7.511	7.653	7.539	6.895	8.951	6.878		Down-regulated	Prupe.1G108800	-1.632	-1.905	-2.475	-2.178	-1.587	-1.143
UP-regulated	Prupe.7G079300	4.624	4.591	3.309	3.037	3.713	3.287		Down-regulated	Prupe.1G110700	-1.501	-1.508	-1.53	-1.439	-1.61	-1.286
UP-regulated	Prupe.2G292100	3.888	3.697	2.297	3.621	3.488	3.141		Down-regulated	Prupe.1G111900	-2.795	-2.394	-4.911	-3.489	-1.635	-2.872
UP-regulated	Prupe.4G068100	2.647	2.422	2.355	2.946	1.779	2.631		Down-regulated	Prupe.1G112000	-3.857	-2.553	-5.087	-3.218	-2.542	-2.314
UP-regulated	Prupe.7G231100	2.28	1.844	2.712	2.75	1.851	2.156		Down-regulated	Prupe.1G114300	-6.348	-4.523	-6.456	-6.367	-4.355	-6.551
UP-regulated	Prupe.8G234900	2.507	1.926	2.194	1.629	2.162	1.99		Down-regulated	Prupe.1G114500	-3.793	-2.224	-2.595	-3.064	-1.56	-2.74
UP-regulated	Prupe.2G256200	5.232	3.664	2.695	2.422	2.567	6.203		Down-regulated	Prupe.1G115200	-2.922	-3.579	-3.477	-5.148	-2.767	-2.457
UP-regulated	Prupe.1G424400	1.614	2.099	1.746	2.554	1.862	2.066		Down-regulated	Prupe.1G123900	-1.986	-2.094	-2.423	-2.195	-2.159	-1.789
UP-regulated	Prupe.2G191100	8.804	6.966	5.971	6.717	7.756	9.37		Down-regulated	Prupe.1G124300	-2.157	-2.423	-2.439	-2.402	-2.222	-3.011
UP-regulated	Prupe.5G167800	6.267	2.86	3.873	5.496	5.66	6.172		Down-regulated	Prupe.1G126200	-1.462	-2.202	-3.193	-3.727	-1.949	-1.206
UP-regulated	Prupe.8G142100	4.62	6.01	7.8	6.701	5.569	6.211		Down-regulated	Prupe.1G127000	-4.097	-6.24	-4.22	-2.428	-4.916	-2.433
UP-regulated	Prupe.6G208900	5.903	5.358	5.593	5.064	2.555	6.021		Down-regulated	Prupe.1G127100	-1.65	-3.385	-2.93	-1.435	-1.533	-1.699
UP-regulated	Prupe.1G549600	3.665	3.933	6.794	6.535	4.399	5.567		Down-regulated	Prupe.1G128800	-1.027	-1.642	-2.763	-1.858	-1.283	-2.09
UP-regulated	Prupe.5G208500	11.259	11.63	12.177	11.863	11.301	11.505		Down-regulated	Prupe.1G131700	-4.116	-3.277	-3.596	-4.998	-2.433	-3.191
UP-regulated	Prupe.3G274800	2.772	2.755	2.166	2.588	1.518	1.499		Down-regulated	Prupe.1G132600	-2.678	-8.077	-6.571	-8.066	-7.905	-4.006
UP-regulated	Prupe.3G227900	8.045	8.097	4.559	6.053	2.833	6.627		Down-regulated	Prupe.1G132900	-1.445	-0.935	-1.281	-1.649	-1.877	-1.405
UP-regulated	Prupe.4G034000	5.195	4.248	1.485	2.26	4.472	2.873		Down-regulated	Prupe.1G134500	-0.946	-1.216	-2.164	-1.861	-1.569	-1.675
UP-regulated	Prupe.1G051300	8.659	9.218	10.782	10.31	7.592	9.187		Down-regulated	Prupe.1G134700	-2.537	-2.236	-3.592	-3.838	-2.592	-2.033
UP-regulated	Prupe.1G323400	4.074	4.245	5.814	4.985	2.469	3.799		Down-regulated	Prupe.1G135600	-2.001	-2.952	-4.154	-5.248	-3.098	-1.575
UP-regulated	Prupe.1G405400	3.421	3.549	3.826	4.075	3.138	4.125		Down-regulated	Prupe.1G143100	-3.194	-3.162	-4.311	-4.123	-3.473	-2.299
UP-regulated	Prupe.1G417400	10.03	10.558	10.434	11.487	10.442	9.685		Down-regulated	Prupe.1G145600	-4.452	-2.008	-5.092	-7.868	-5.853	-1.609
UP-regulated	Prupe.2G192100	6.82	6.989	5.845	6.916	3.447	5.755		Down-regulated	Prupe.1G152200	-3.056	-2.352	-2.979	-2.011	-1.521	-3.725
UP-regulated	Prupe.3G006300	5.382	6.138	3.254	6.782	3.172	4.724		Down-regulated	Prupe.1G153700	-2.453	-1.647	-2.878	-1.852	-6.917	-6.848
UP-regulated	Prupe.3G042100	7.268	6.283	8.001	6.86	5.468	7.228		Down-regulated	Prupe.1G154200	-2.951	-3.411	-4.402	-4.19	-3.081	-2.376
UP-regulated	Prupe.3G227800	10.76	10.52	5.244	9.84	9.082	9.82		Down-regulated	Prupe.1G158800	-1.167	-1.239	-1.322	-1.095	-1.011	-1.27
UP-regulated	Prupe.4G126900	6.421	7.076	6.703	7.696	7.934	6.973		Down-regulated	Prupe.1G159400	-1.983	-1.218	-1.779	-2.788	-1.531	-1.974
UP-regulated	Prupe.4G136300	7.525	8.219	7.261	7.816	7.773	7.383		Down-regulated	Prupe.1G161100	-1.47	-1.548	-1.406	-1.487	-1.676	-1.175
UP-regulated	Prupe.5G031700	6.489	5.458	5.16	6.665	6.17	5.996		Down-regulated	Prupe.1G166000	-6.861	-6.889	-6.969	-6.88	-6.719	-6.101
UP-regulated	Prupe.5G077500	8.146	8.203	8.406	8.407	7.668	8.315		Down-regulated	Prupe.1G166600	-2.187	-2.269	-2.117	-1.979	-1.737	-1.293
UP-regulated	Prupe.6G085000	4.586	4.483	6.167	5.109	3.361	4.978		Down-regulated	Prupe.1G169400	-2.319	-2.204	-2.217	-2.509	-2.748	-1.917
UP-regulated	Prupe.6G188300	6.407	6.963	7.162	7.032	5.757	6.356		Down-regulated	Prupe.1G172400	-2.271	-4.879	-2.162	-3.885	-2.719	-2.366
UP-regulated	Prupe.6G303300	2.485	2.208	2.799	2.779	3.266	3.304		Down-regulated	Prupe.1G173100	-2.052	-2.302	-2.374	-2.647	-2.207	-1.344
UP-regulated	Prupe.7G128800	2.447	2.836	3.618	3.765	1.722	1.832		Down-regulated	Prupe.1G174300	-5.578	-3.764	-2.828	-5.595	-1.587	-2.912
UP-regulated	Prupe.7G216000	7.738	6.429	5.458	6.777	3.932	6.648		Down-regulated	Prupe.1G184400	-2.541	-1.668	-2.01	-1.759	-1.527	-1.985
UP-regulated	Prupe.8G016100	4.539	5.508	6.364	6.726	6.086	5.576		Down-regulated	Prupe.1G186100	-2.651	-3.074	-6.63	-2.709	-1.349	-1.876
UP-regulated	Prupe.8G164300	3.664	3.579	4.701	4.106	2.957	3.865		Down-regulated	Prupe.1G187700	-1.037	-1.138	-1.337	-1.268	-0.769	-1.232
UP-regulated	Prupe.1G031200	5.789	5.148	6.946	6.66	5.09	5.794		Down-regulated	Prupe.1G187800	-3.92	-3.917	-2.179	-5.749	-5.588	-5.932
UP-regulated	Prupe.2G307600	4.997	5.358	6.339	6.936	5.394	5.884		Down-regulated	Prupe.1G191600	-1.431	-1.235	-1.3	-1.33	-1.457	-1.34
UP-regulated	Prupe.6G256900	2.097	1.793	1.328	1.403	1.695	2.077		Down-regulated	Prupe.1G193200	-0.89	-0.906	-1.239	-1.507	-6.431	-4.924
UP-regulated	Prupe.7G212300	4.256	4.049	6.011	5.119	2.791	5.309		Down-regulated	Prupe.1G194300	-4.976	-5.471	-6.491	-5.741	-5.433	-2.517
UP-regulated	Prupe.8G058100	4.438	3.872	5.048	3.22	1.512	2.748		Down-regulated	Prupe.1G196700	-1.102	-1.475	-2.26	-1.723	-1.018	-1.375
UP-regulated	Prupe.1G454900	10.632	11.902	12.05	12.707	12.118	11.699		Down-regulated	Prupe.1G206400	-4.031	-8.932	-9.012	-8.922	-8.762	-9.106
UP-regulated	Prupe.1G560100	6.029	5.004	7.283	5.695	3.888	5.533		Down-regulated	Prupe.1G208300	-5.438	-4.65	-5.217	-6.452	-4.964	-4.309
UP-regulated	Prupe.1G587100	3.22	3.105	2.463	3.1	3.273	3.043		Down-regulated	Prupe.1G210800	-1.32	-1.043	-2.127	-1.42	-1.411	-1.108
UP-regulated	Prupe.2G202400	2.116	2.15	2.944	2.209	1.459	2.345		Down-regulated	Prupe.1G213200	-6.202	-6.707	-10.165	-6.398	-5.061	-6.673
UP-regulated	Prupe.3G178000	4.794	4.194	3.699	4.109	4.339	3.618		Down-regulated	Prupe.1G216000	-1.844	-1.895	-2.233	-1.996	-1.223	-1.345
UP-regulated	Prupe.3G310600	12.958	13.369	13.082	14.235	11.476	13.651		Down-regulated	Prupe.1G217400	-1.656	-1.389	-2.838	-1.486	-1.221	-1.214
UP-regulated	Prupe.4G138500	5.383	5.172	3.764	4.418	6.15	5.33		Down-regulated	Prupe.1G218900	-1.191	-1.247	-1.767	-1.643	-0.841	-2.001
UP-regulated	Prupe.6G134400	7.025	7.071	3.653	7.323	5.841	7.437		Down-regulated	Prupe.1G223400	-1.461	-1.23	-1.788	-1.547	-1.531	-1.221
UP-regulated	Prupe.7G001200	4.288	4.699	6.057	4.564	5.031	4.323		Down-regulated	Prupe.1G229500	-1.123	-1.879	-3.127	-2.781	-2.321	-1.32
UP-regulated	Prupe.7G013900	4.99	3.96	6.081	5.737	4.055	5.948		Down-regulated	Prupe.1G232600	-1.744	-1.626	-1.592	-0.966	-1.471	-1.7
UP-regulated	Prupe.7G217000	3.169	3.032	3.669	3.81	2.196	3.451		Down-regulated	Prupe.1G233100	-2.046	-1.805	-2.932	-3.02	-2.566	-1.768
UP-regulated	Prupe.8G174800	4.008	1.712	2.148	2.566	1.411	3.227		Down-regulated	Prupe.1G233700	-1.372	-1.781	-2.768	-2.339	-2.096	-1.298
UP-regulated	Prupe.3G043900	1.898	2.344	2.521	2.373	2.055	2.204		Down-regulated	Prupe.1G235300	-2.808	-2.613	-3.672	-3.265	-2.362	-2.482
UP-regulated	Prupe.7G093100	1.943	2.42	3.377	3.319	1.499	1.97		Down-regulated	Prupe.1G235600	-1.863	-2.39	-3.14	-2.783	-2.017	-1.699
UP-regulated	Prupe.8G256000	8.234	6.645	8.776	8.906	6.855	7.036		Down-regulated	Prupe.1G235800	-2.968	-2.471	-3.124	-3.461	-5.464	-1.788
UP-regulated	Prupe.1G152500	2.624	2.88	3.728	3.448	2.828	3.081		Down-regulated	Prupe.1G239900	-5.27	-8.709	-4.608	-4.848	-4.223	-4.214
UP-regulated	Prupe.1G223500	2.648	2.253	2.201	2.231	1.265	2.376		Down-regulated	Prupe.1G246400	-1.539	-2.288	-2.399	-2.893	-1.846	-1.348
UP-regulated	Prupe.1G290200	2.885	3.388	4.002	3.342	1.413	3.518		Down-regulated	Prupe.1G247500	-3.929	-4.498	-4.404	-4.252	-2.322	-3.557
UP-regulated	Prupe.3G308100	2.191	2.586	3.105	2.97	2.265	2.738		Down-regulated	Prupe.1G247600	-2.609	-4.841	-3.961	-4.537	-2.145	-3.656
UP-regulated	Prupe.4G050400	4.728	4.535	4.554	4.614	2.587	5.808		Down-regulated	Prupe.1G249700	-2.99	-4.109	-3.829	-5.017	-1.719	-3.188
UP-regulated	Prupe.2G036500	3.759	2.226	2.54	2.41	2.515	3.618		Down-regulated	Prupe.1G251600	-2.297	-2.887	-1.426	-1.177	-0.842	-1.107
UP-regulated	Prupe.8G088300	9.158	7.519	8.989	8.856	6.054	9.804		Down-regulated	Prupe.1G252800	-2.423	-2.226	-3.554	-3.645	-1.767	-2.871
UP-regulated	Prupe.1G486200	1.411	1.675	2.623	2.283	1.393	1.856		Down-regulated	Prupe.1G253700	-2.011	-2.182	-3.489	-1.883	-0.848	-1.738
UP-regulated	Prupe.5G104600	8.181	9.176	9.828	10.101	9.171	8.479		Down-regulated	Prupe.1G254000	-1.578	-2.56	-4.27	-3.675	-2.628	-1.295
UP-regulated	Prupe.6G105100	2.386	2.465	3.06	2.719	2.475	3.044		Down-regulated	Prupe.1G264100	-1.73	-2.719	-3.244	-2.653	-2.593	-1.696
UP-regulated	Prupe.7G254700	2.021	2.272	1.679	2.178	1.519	1.475		Down-regulated	Prupe.1G264200	-3.399	-1.969	-7.706	-7.616	-3.275	-1.165
UP-regulated	Prupe.1G070500	3.856	3.659	2.985	3.538	3.208	3.638		Down-regulated	Prupe.1G272300	-1.22	-2.792	-5.007	-4.211	-4.251	-1.438
UP-regulated	Prupe.1G272500	5.97	6.169	7.458	6.801	5.12	7.146		Down-regulated	Prupe.1G272400	-2.376	-1.924	-3.855	-3.798	-4.277	-1.528
UP-regulated	Prupe.3G252600	6.259	6.906	7.01	7.254	7.703	6.343		Down-regulated	Prupe.1G273100	-1.577	-1.429	-1.897	-2.232	-1.167	-1.344
UP-regulated	Prupe.4G083500	4.939	5.341	5.749	5.635	5.177	5.239		Down-regulated	Prupe.1G276700	-1.803	-3.065	-3.34	-2.887	-2.492	-1.845
UP-regulated	Prupe.5G088800	1.324	1.663	2.036	1.986	1.883	1.613		Down-regulated	Prupe.1G281400	-1.412	-3.192	-3.991	-3.863	-4.479	-2.023
UP-regulated	Prupe.5G217200	4.596	3.765	6.897	5.924	4.03	5.324		Down-regulated	Prupe.1G283300	-3.065	-2.618	-3.579	-2.684	-1.691	-1.988
UP-regulated	Prupe.6G341000	7.012	6.529	8.879	7.219	6.709	7.661		Down-regulated	Prupe.1G284600	-2.52	-2.859	-4.181	-3.376	-1.179	-2.306
UP-regulated	Prupe.8G028800	1.817	2.627	4.786	3.056	2.663	3.207		Down-regulated	Prupe.1G285800	-3.535	-3.945	-4.824	-3.773	-3.467	-3.551
UP-regulated	Prupe.2G302500	3.066	2.432	1.882	4.586	2.483	2.592		Down-regulated	Prupe.1G286600	-1.233	-1.313	-2.376	-2.042	-0.892	-1.583
UP-regulated	Prupe.1G223200	4.466	4.136	4.16	4.333	4.092	3.61		Down-regulated	Prupe.1G286900	-2.329	-2.485	-4.034	-4.267	-4.532	-1.332
UP-regulated	Prupe.1G393000	3.341	3.803	1.651	4.347	2.851	3.382		Down-regulated	Prupe.1G297600	-1.859	-1.992	-3.9	-3.81	-3.649	-3.993
UP-regulated	Prupe.2G177800	5.106	6.409	5.517	6.718	6.338	6.404		Down-regulated	Prupe.1G304800	-2.137	-2.554	-4.13	-4.085	-4.042	-1.738
UP-regulated	Prupe.2G231300	6.363	6.382	5.039	6.505	6.345	6.105		Down-regulated	Prupe.1G308500	-1.686	-2.228	-2.597	-2.161	-3.094	-1.174
UP-regulated	Prupe.2G265000	3.567	3.398	2.851	5.139	1.402	3.37		Down-regulated	Prupe.1G311100	-2.307	-2.424	-3.052	-2.093	-0.976	-2.35
UP-regulated	Prupe.3G002300	1.825	2.359	1.861	1.81	1.715	1.209		Down-regulated	Prupe.1G320600	-2.885	-3.133	-3.414	-3.733	-3.121	-1.982
UP-regulated	Prupe.3G098100	4.902	5.153	1.484	4.656	3.407	4.034		Down-regulated	Prupe.1G325800	-1.992	-1.274	-2.901	-1.79	-2.509	-1.896
UP-regulated	Prupe.5G074200	2.39	2.596	3.687	3.075	1.85	2.231		Down-regulated	Prupe.1G331300	-1.529	-1.48	-1.384	-1.449	-0.979	-1.087
UP-regulated	Prupe.5G117000	3.643	4.622	1.389	5.263	2.549	4.454		Down-regulated	Prupe.1G333900	-2.301	-3.536	-3.645	-2.988	-1.343	-2.251
UP-regulated	Prupe.6G168200	3.655	4.152	4.934	3.971	1.85	4.724		Down-regulated	Prupe.1G336400	-1.966	-1.934	-2.288	-1.513	-1.711	-2.111
UP-regulated	Prupe.6G286000	4.406	5.133	2.11	5.641	3.722	5.034		Down-regulated	Prupe.1G338000	-1.536	-1.668	-2.487	-2.761	-1.803	-2.078
UP-regulated	Prupe.6G295000	9.348	7.637	8.626	11.14	6.281	8.467		Down-regulated	Prupe.1G343500	-2.013	-1.807	-2.609	-2.371	-1.91	-1.656
UP-regulated	Prupe.6G295100	7.164	6.216	6.532	7.843	3.687	6.72		Down-regulated	Prupe.1G344600	-0.994	-0.899	-1.103	-1.361	-1.047	-1.256
UP-regulated	Prupe.8G265900	6.137	5.94	7.961	6.714	5.191	6.983		Down-regulated	Prupe.1G350700	-2.712	-3.287	-3.465	-4.336	-2.955	-1.959
UP-regulated	Prupe.7G155700	9.362	6.097	8.144	7.646	4.614	6.512		Down-regulated	Prupe.1G354300	-2.883	-3.165	-4.981	-3.947	-2.468	-1.981
UP-regulated	Prupe.1G261900	5.04	1.47	2.763	1.808	2.884	3.396		Down-regulated	Prupe.1G355700	-3.789	-1.553	-2.915	-1.426	-0.769	-2.795
UP-regulated	Prupe.1G296100	2.09	1.891	1.432	1.59	2.233	1.641		Down-regulated	Prupe.1G357100	-2.488	-3.308	-4.757	-3.693	-1.921	-2.816
UP-regulated	Prupe.1G360900	2.581	2.163	1.621	3.377	2.855	3.802		Down-regulated	Prupe.1G360400	-1.926	-2.071	-2.249	-1.748	-0.811	-2.556
UP-regulated	Prupe.1G455600	2.653	2.068	3.763	2.37	1.575	4.063		Down-regulated	Prupe.1G363400	-1.67	-1.691	-2.09	-2.081	-1.973	-1.502
UP-regulated	Prupe.4G046200	1.825	1.142	1.301	1.31	1.256	1.763		Down-regulated	Prupe.1G364800	-1.801	-1.709	-2.01	-1.718	-0.931	-1.932
UP-regulated	Prupe.6G152800	1.446	2.677	2.212	1.866	2.394	1.181		Down-regulated	Prupe.1G367800	-4.066	-6.297	-3.987	-5.457	-5.583	-3.202
UP-regulated	Prupe.1G153900	1.8	1.379	2.658	1.95	2.052	2.161		Down-regulated	Prupe.1G368000	-1.677	-1.744	-2.421	-1.895	-1.302	-1.293
UP-regulated	Prupe.7G255600	4.296	5.257	4.192	6.383	2.684	3.068		Down-regulated	Prupe.1G370300	-1.919	-3.135	-5.384	-3.29	-2.859	-1.249
UP-regulated	Prupe.8G030600	4.261	5.493	3.454	3.607	3.333	3.155		Down-regulated	Prupe.1G374200	-2.029	-1.873	-4.447	-2.101	-2.608	-1.455
UP-regulated	Prupe.5G139400	3.494	3.236	2.687	2.261	4.143	2.903		Down-regulated	Prupe.1G375300	-1.405	-1.953	-2.382	-1.939	-1.552	-1.835
UP-regulated	Prupe.1G303000	4.103	2.899	0.979	2.46	2.869	1.461		Down-regulated	Prupe.1G377200	-3.958	-2.564	-2.629	-4.544	-0.86	-2.398
UP-regulated	Prupe.4G289000	4.475	3.57	2.032	3.357	2.794	2.457		Down-regulated	Prupe.1G381200	-2.571	-2.784	-4.103	-3.713	-3.464	-1.201
UP-regulated	Prupe.6G185000	5.177	4.631	1.257	5.654	5.515	1.891		Down-regulated	Prupe.1G381400	-2.032	-1.56	-1.657	-1.724	-1.75	-1.594
UP-regulated	Prupe.1G185100	4.473	4.679	6.627	6.876	6.618	2.982		Down-regulated	Prupe.1G381900	-2.012	-1.277	-1.573	-1.802	-1.672	-1.745
UP-regulated	Prupe.1G365400	2.67	3.194	2.698	1.922	3.017	1.207		Down-regulated	Prupe.1G383400	-3.418	-6.715	-8.119	-6.325	-5.3	-4.59
UP-regulated	Prupe.1G537000	6.688	6.13	6.465	4.869	4.454	3.696		Down-regulated	Prupe.1G393700	-1.621	-1.641	-1.983	-2.109	-1.81	-1.867
UP-regulated	Prupe.1G550800	1.635	1.811	1.977	1.517	1.471	0.954		Down-regulated	Prupe.1G393900	-1.168	-1.22	-1.293	-1.244	-0.793	-1.328
UP-regulated	Prupe.3G254000	1.92	2.188	2.692	2.45	2.071	1.064		Down-regulated	Prupe.1G394200	-2.001	-2.605	-4.557	-3.822	-2.443	-1.306
UP-regulated	Prupe.4G141200	1.621	2.729	3.086	6.981	3.089	2.559		Down-regulated	Prupe.1G396800	-1.387	-1.416	-1.935	-1.475	-1.2	-1.554
UP-regulated	Prupe.5G216900	1.259	1.31	1.364	1.469	1.475	0.98		Down-regulated	Prupe.1G399900	-2.462	-2.782	-3.94	-2.513	-1.604	-4.062
UP-regulated	Prupe.5G225900	3.667	3.696	3.21	4.297	4.701	1.666		Down-regulated	Prupe.1G400100	-3.685	-2.541	-3.459	-1.415	-2.268	-3.553
UP-regulated	Prupe.6G182700	2.553	2.493	2.066	3.239	2.588	1.611		Down-regulated	Prupe.1G402300	-3.675	-1.387	-7.235	-5.283	-0.847	-2.665
UP-regulated	Prupe.7G076600	2.67	2.587	2.347	3.06	3.676	1.029		Down-regulated	Prupe.1G402400	-1.765	-1.413	-2.209	-1.996	-0.926	-1.546
UP-regulated	Prupe.7G081500	6.955	7.633	5.031	10.02	7.381	5.814		Down-regulated	Prupe.1G403600	-1.85	-1.573	-1.219	-1.257	-0.778	-1.443
UP-regulated	Prupe.8G053200	1.604	2.124	1.139	1.749	2.434	1.095		Down-regulated	Prupe.1G408600	-2.292	-3.092	-2.366	-2.526	-0.756	-2.273
UP-regulated	Prupe.4G051900	1.589	2.147	1.399	3.076	2.869	2.358		Down-regulated	Prupe.1G409300	-1.364	-1.514	-1.483	-1.159	-1.061	-1.487
UP-regulated	Prupe.4G168500	2.128	1.967	2.051	2.395	2.127	4.448		Down-regulated	Prupe.1G410500	-2.336	-3.116	-3.478	-2.677	-2.069	-3.484
UP-regulated	Prupe.4G248300	3.431	1.503	0.941	1.74	1.524	5.181		Down-regulated	Prupe.1G411100	-1.335	-1.047	-1.127	-1.282	-1.271	-1.094
UP-regulated	Prupe.7G048000	1.846	4.317	1.212	1.673	1.677	2.517		Down-regulated	Prupe.1G414300	-1.552	-1.919	-1.341	-2.31	-1.635	-1.658
UP-regulated	Prupe.8G043200	2.681	2.055	2.304	1.976	2.708	3.118		Down-regulated	Prupe.1G414800	-1.799	-1.998	-2.369	-2.424	-1.969	-3.368
UP-regulated	Prupe.8G118200	1.536	1.975	1.332	1.243	2.399	2.671		Down-regulated	Prupe.1G419600	-2.639	-3.585	-4.713	-4.258	-2.983	-1.774
UP-regulated	Prupe.1G135900	2.162	2.487	3.33	2.069	2.61	3.268		Down-regulated	Prupe.1G426900	-2.979	-2.18	-6.487	-3.942	-2.809	-1.812
UP-regulated	Prupe.1G394000	6.056	3.503	5.053	2.345	2.529	3.69		Down-regulated	Prupe.1G428000	-1.796	-2.009	-1.586	-2.349	-1.391	-1.814
UP-regulated	Prupe.6G239800	3.333	1.595	2.318	1.174	1.419	2.524		Down-regulated	Prupe.1G428300	-1.572	-4.12	-9.703	-6.757	-3.072	-1.295
UP-regulated	Prupe.1G124100	2.378	2.424	2.043	3.268	1.613	3.249		Down-regulated	Prupe.1G429200	-3.264	-4.817	-8.92	-5.974	-4.488	-4.826
UP-regulated	Prupe.1G207900	7.454	6.697	4.163	5.531	4.895	5.649		Down-regulated	Prupe.1G430500	-2.283	-2.165	-2.245	-3.23	-3.465	-1.658
UP-regulated	Prupe.1G404100	1.633	2.956	1.41	2.247	1.895	2.095		Down-regulated	Prupe.1G435800	-1.484	-2.069	-2.089	-1.777	-2.08	-1.287
UP-regulated	Prupe.1G562500	2.298	2.717	1.85	2.182	1.723	1.918		Down-regulated	Prupe.1G438300	-1.972	-1.519	-1.625	-1.157	-0.829	-1.822
UP-regulated	Prupe.1G005400	5.743	6.378	6.929	4.401	1.716	8.265		Down-regulated	Prupe.1G440400	-5.167	-5.858	-6.934	-4.672	-1.117	-6.446
UP-regulated	Prupe.1G021400	11.438	6.311	9.288	5.845	5.332	6.14		Down-regulated	Prupe.1G443900	-2.381	-3.156	-4.983	-5.018	-2.315	-2.035
UP-regulated	Prupe.1G067600	2.486	2.564	2.216	2.053	1.273	3.735		Down-regulated	Prupe.1G445700	-4.318	-4.057	-2.216	-3.218	-1.282	-3.629
UP-regulated	Prupe.1G089200	3.05	3.192	4.06	2.927	1.983	3.541		Down-regulated	Prupe.1G445800	-1.074	-2.118	-2.282	-2.776	-3.364	-1.643
UP-regulated	Prupe.1G121400	2.771	3.982	3.74	2.299	1.626	3.689		Down-regulated	Prupe.1G446100	-2.147	-3.945	-4.023	-2.106	-0.929	-2.255
UP-regulated	Prupe.1G132700	3.827	3.153	3.688	2.965	2.327	4.735		Down-regulated	Prupe.1G446300	-3.496	-2.435	-9.054	-4.257	-3.954	-4.008
UP-regulated	Prupe.1G272600	4.472	3.971	6.745	5.438	2.724	5.834		Down-regulated	Prupe.1G446400	-2.651	-1.252	-3.517	-3.369	-4.916	-2.345
UP-regulated	Prupe.1G274600	3.268	3.88	5.119	5.213	2.194	4.369		Down-regulated	Prupe.1G450000	-5.212	-3.068	-3.646	-1.922	-3.075	-1.427
UP-regulated	Prupe.1G303600	2.078	2.929	3.605	3.651	1.574	2.448		Down-regulated	Prupe.1G450800	-4.602	-6.21	-7.49	-7.346	-7.625	-5.969
UP-regulated	Prupe.1G327400	10.789	8.327	6.01	6.097	4.404	6.605		Down-regulated	Prupe.1G453400	-4.445	-3.412	-5.259	-6.339	-6.593	-3.435
UP-regulated	Prupe.1G334100	2.105	2.893	3.09	3.203	1.644	2.623		Down-regulated	Prupe.1G455700	-2.844	-2.155	-2.094	-2.581	-3.194	-1.142
UP-regulated	Prupe.1G361300	3.991	3.506	5.059	4.032	1.215	4.171		Down-regulated	Prupe.1G461400	-2.173	-2.57	-4.918	-4.118	-2.648	-1.439
UP-regulated	Prupe.1G365100	5.263	3.893	4.539	3.944	1.372	5.22		Down-regulated	Prupe.1G463400	-0.974	-1.534	-2.095	-1.704	-1.19	-1.379
UP-regulated	Prupe.2G083000	5.294	4.163	5.558	6.007	2.428	5.535		Down-regulated	Prupe.1G464000	-1.195	-1.766	-3.259	-1.582	-1.981	-1.172
UP-regulated	Prupe.2G174500	4.251	3.953	2.633	3.188	1.318	3.579		Down-regulated	Prupe.1G464700	-1.685	-1.294	-3.057	-2.302	-1.932	-2.9
UP-regulated	Prupe.3G010800	2.489	1.535	2.421	2.428	1.449	1.977		Down-regulated	Prupe.1G466000	-5.333	-4.647	-2.863	-3.493	-2.74	-2.233
UP-regulated	Prupe.3G042700	2.237	3.249	3.912	3.316	1.84	4.02		Down-regulated	Prupe.1G467200	-3.028	-3.016	-5.122	-4.039	-2.089	-1.935
UP-regulated	Prupe.3G106200	3.606	4.385	2.19	2.557	1.536	4.551		Down-regulated	Prupe.1G471300	-3.341	-1.775	-2.243	-1.324	-2.513	-3.05
UP-regulated	Prupe.3G106500	3.446	4.666	3.921	4.076	1.857	3.15		Down-regulated	Prupe.1G472100	-1.881	-2.035	-2.361	-1.732	-1.618	-1.522
UP-regulated	Prupe.3G193600	4.053	3.162	3.139	4.353	2.055	3.507		Down-regulated	Prupe.1G484100	-2.713	-2.416	-3.448	-2.119	-1.497	-4.962
UP-regulated	Prupe.3G244700	7.886	3.676	6.573	3.688	2.03	6.47		Down-regulated	Prupe.1G485200	-2.333	-2.737	-5.371	-4.659	-2.939	-1.809
UP-regulated	Prupe.3G279200	5.349	4.933	6.728	5.893	4.66	5.913		Down-regulated	Prupe.1G485400	-2.04	-3.542	-2.139	-1.954	-1.811	-3.294
UP-regulated	Prupe.4G140900	7.26	5.858	8.434	5.002	4.405	6.6		Down-regulated	Prupe.1G486900	-2.842	-2.817	-3.412	-2.811	-2.748	-2.485
UP-regulated	Prupe.4G197900	5.115	5.714	7.336	8.531	3.109	5.589		Down-regulated	Prupe.1G487100	-4.133	-2.587	-4.261	-1.865	-5.88	-3.359
UP-regulated	Prupe.4G282800	3.567	2.869	3.522	3.412	1.988	3.186		Down-regulated	Prupe.1G491700	-2.571	-3.619	-5	-4.857	-3.994	-1.77
UP-regulated	Prupe.5G039000	1.884	1.405	1.758	1.657	1.456	1.699		Down-regulated	Prupe.1G491800	-3.73	-3.229	-3.233	-2.628	-1.432	-3.102
UP-regulated	Prupe.5G067600	7.575	5.823	5.74	5.746	2.389	3.567		Down-regulated	Prupe.1G492800	-2.563	-1.961	-3.981	-4.108	-1.426	-3.025
UP-regulated	Prupe.5G074100	6.489	4.923	7.36	6.857	4.929	5.453		Down-regulated	Prupe.1G495400	-3.608	-3.081	-2.305	-2.927	-2.335	-2.581
UP-regulated	Prupe.5G135200	6.804	4.811	6.361	5.639	1.656	7.674		Down-regulated	Prupe.1G495600	-2.2	-2.14	-2.475	-2.218	-1.942	-1.475
UP-regulated	Prupe.5G145700	7.335	5.767	7.257	6.489	1.837	8.485		Down-regulated	Prupe.1G496800	-1.538	-2.938	-1.931	-1.434	-1.48	-1.452
UP-regulated	Prupe.5G148100	10.614	7.139	10.786	6.588	5.388	9.608		Down-regulated	Prupe.1G497000	-1.485	-2.621	-5.586	-4.5	-1.821	-2.493
UP-regulated	Prupe.5G175800	3.399	3.122	3.615	4.596	1.276	3.532		Down-regulated	Prupe.1G498000	-2.101	-2.877	-2.633	-3.189	-3.019	-1.408
UP-regulated	Prupe.5G198800	3.264	3.136	4.69	3.271	1.831	3.625		Down-regulated	Prupe.1G502700	-4.935	-4.962	-5.042	-4.953	-4.792	-5.137
UP-regulated	Prupe.6G069500	4.655	4.035	2.095	3.674	1.296	3.896		Down-regulated	Prupe.1G502900	-1.54	-1.707	-2.211	-1.411	-0.868	-1.813
UP-regulated	Prupe.6G208100	2.668	5.266	2.494	2.93	2.136	2.937		Down-regulated	Prupe.1G503700	-3.355	-3.728	-4.623	-4.127	-3.781	-2.603
UP-regulated	Prupe.6G219300	3.927	3.636	2.44	2.413	1.603	2.35		Down-regulated	Prupe.1G504400	-2.156	-2.306	-2.966	-2.375	-1.048	-2.3
UP-regulated	Prupe.6G222000	2.298	3.386	3.506	3.261	1.376	2.831		Down-regulated	Prupe.1G505200	-4.173	-3.029	-2.957	-3.92	-4.556	-2.138
UP-regulated	Prupe.6G247400	4.836	5.379	6.131	4.779	1.829	6.136		Down-regulated	Prupe.1G507800	-2.642	-1.697	-1.731	-2.289	-1.83	-2.247
UP-regulated	Prupe.7G094900	1.608	2.045	3.481	2.557	1.563	1.979		Down-regulated	Prupe.1G510100	-1.458	-1.291	-1.329	-1.424	-1.072	-1.407
UP-regulated	Prupe.7G107400	7.894	3.518	5.588	4.592	1.578	7.638		Down-regulated	Prupe.1G512300	-3.57	-4.739	-5.953	-3.263	-2.178	-4.151
UP-regulated	Prupe.7G107800	7.096	5.107	5.048	4.427	1.923	7.061		Down-regulated	Prupe.1G519500	-3.328	-2.245	-1.526	-2.531	-4.243	-2.137
UP-regulated	Prupe.7G110000	2.222	3.155	2.873	3.334	1.339	3.072		Down-regulated	Prupe.1G520900	-1.531	-1.939	-4.708	-2.383	-0.847	-2.523
UP-regulated	Prupe.7G140900	3.197	5.546	6.289	5.135	1.453	4.37		Down-regulated	Prupe.1G521700	-2.556	-1.766	-3.559	-4.243	-1.559	-1.821
UP-regulated	Prupe.8G030000	10.053	10.517	11.565	10.817	5.689	10.395		Down-regulated	Prupe.1G523400	-1.68	-1.343	-1.607	-1.364	-1.254	-1.397
UP-regulated	Prupe.8G058800	5.644	2.51	4.264	3.612	1.414	3.981		Down-regulated	Prupe.1G528500	-2.13	-2.179	-2.789	-2.28	-1.523	-1.882
UP-regulated	Prupe.8G123000	5.013	1.862	6.302	4.292	1.519	5.185		Down-regulated	Prupe.1G529100	-1.89	-2.631	-3.4	-2.654	-2.863	-2.079
UP-regulated	Prupe.8G127100	2.108	2.437	3.318	2.869	1.381	2.301		Down-regulated	Prupe.1G529400	-1.29	-3.341	-6.333	-3.923	-1.086	-3.418
UP-regulated	Prupe.8G145600	4.994	5.139	6.878	5.744	1.527	6.042		Down-regulated	Prupe.1G529500	-1.513	-2.395	-6.416	-4.598	-1.1	-4.941
UP-regulated	Prupe.2G017000	5.453	5.364	3.832	3.521	5.084	5.072		Down-regulated	Prupe.1G531800	-1.895	-1.691	-1.73	-1.785	-2.048	-1.511
UP-regulated	Prupe.3G002100	4.079	3.899	1.917	1.349	2.463	2.3		Down-regulated	Prupe.1G532000	-2.401	-3.268	-4.396	-3.863	-2.893	-1.644
UP-regulated	Prupe.4G254600	2.058	1.664	1.086	1.11	1.913	2.168		Down-regulated	Prupe.1G532100	-1.932	-2.178	-3.026	-2.498	-2.285	-1.837
UP-regulated	Prupe.8G112000	2.037	2.788	1.096	1.054	1.828	1.234		Down-regulated	Prupe.1G534600	-7.467	-7.494	-3.392	-4.035	-5.47	-1.765
UP-regulated	Prupe.8G146900	3.866	2.916	2.563	2.459	3.787	3.794		Down-regulated	Prupe.1G536100	-2.032	-1.712	-1.769	-1.973	-1.496	-2.086
UP-regulated	Prupe.2G012100	1.593	2.158	2.263	1.351	2.376	2.067		Down-regulated	Prupe.1G536200	-1.769	-1.977	-2.025	-2.217	-2.931	-2.772
UP-regulated	Prupe.2G035200	2.533	4.177	1.921	1.146	1.986	4.369		Down-regulated	Prupe.1G538400	-1.236	-1.542	-1.107	-1.138	-1.187	-1.14
UP-regulated	Prupe.3G215600	8.041	6.573	5.156	4.752	7.018	7.103		Down-regulated	Prupe.1G539400	-2.083	-2.062	-2.76	-2.085	-2.241	-2.063
UP-regulated	Prupe.4G092100	2.553	2.309	4.019	2.499	2.594	3.767		Down-regulated	Prupe.1G540700	-1.559	-3.015	-2.523	-2.708	-2.219	-1.728
UP-regulated	Prupe.7G051100	6.398	4.928	3.163	1.921	2.691	4.335		Down-regulated	Prupe.1G541000	-2.66	-2.064	-3.22	-3.051	-2.265	-1.391
UP-regulated	Prupe.8G247200	5.277	3.278	4.411	3.279	5.457	4.299		Down-regulated	Prupe.1G545100	-1.615	-1.629	-1.356	-2.002	-2.1	-1.609
UP-regulated	Prupe.1G092900	2.37	2.342	1.148	1.661	2.461	4.311		Down-regulated	Prupe.1G552400	-8.812	-8.838	-7.919	-6.225	-1.83	-10.871
UP-regulated	Prupe.1G129000	6.502	6.049	1.481	3.672	5.839	4.124		Down-regulated	Prupe.1G552600	-2.191	-2.971	-3.289	-1.668	-1.101	-4.576
UP-regulated	Prupe.1G231400	3.979	4.019	1.492	3.645	2.787	2.534		Down-regulated	Prupe.1G553400	-1.673	-5.867	-5.946	-5.857	-5.696	-4.177
UP-regulated	Prupe.2G215800	2.4	2.268	0.968	1.544	2.184	1.337		Down-regulated	Prupe.1G555100	-1.676	-1.506	-1.584	-1.747	-1.285	-1.717
UP-regulated	Prupe.2G251200	7.081	7.118	0.949	4.24	5.357	4.795		Down-regulated	Prupe.1G558300	-2.107	-2.05	-2.37	-1.384	-2.342	-4.161
UP-regulated	Prupe.2G251900	8.492	6.52	6.644	7.398	7.468	7.317		Down-regulated	Prupe.1G559600	-1.284	-1.046	-1.381	-1.342	-1.359	-1.241
UP-regulated	Prupe.3G027900	1.744	3.149	1.256	1.95	1.947	4.732		Down-regulated	Prupe.1G559900	-2.286	-1.961	-2.028	-1.366	-1.913	-1.645
UP-regulated	Prupe.3G110600	7.49	7.906	2.927	5.336	7.096	7.469		Down-regulated	Prupe.1G561100	-1.152	-1.205	-1.435	-0.988	-1.001	-1.634
UP-regulated	Prupe.3G145700	4.473	4.635	1.742	4.795	3.655	4.768		Down-regulated	Prupe.1G562600	-2.026	-1.773	-1.591	-1.504	-1.57	-1.459
UP-regulated	Prupe.3G187300	2.35	2.385	0.962	2.627	2.549	1.506		Down-regulated	Prupe.1G563000	-2.37	-2.548	-2.865	-2.782	-2.424	-2.009
UP-regulated	Prupe.3G216700	3.618	3.897	2.086	3.95	3.599	3.905		Down-regulated	Prupe.1G563500	-1.627	-1.506	-1.561	-1.636	-1.147	-1.444
UP-regulated	Prupe.4G159800	5.523	5.603	1.358	3.644	2.817	3.643		Down-regulated	Prupe.1G564000	-1.324	-1.571	-2.306	-1.921	-1.677	-1.454
UP-regulated	Prupe.5G044900	4.409	7.423	4.438	4.631	6.456	8.738		Down-regulated	Prupe.1G564700	-3.485	-1.342	-2.602	-1.919	-1.352	-1.685
UP-regulated	Prupe.5G063600	3.061	2.391	2.147	2.942	3.955	3.355		Down-regulated	Prupe.1G564800	-1.05	-1.28	-1.124	-0.984	-1.987	-1.068
UP-regulated	Prupe.5G086800	2.122	1.205	0.934	1.564	1.94	1.653		Down-regulated	Prupe.1G567700	-3.585	-3.613	-3.693	-3.604	-3.443	-3.787
UP-regulated	Prupe.5G108100	7.068	6.833	2.054	6.329	6.269	4.724		Down-regulated	Prupe.1G568000	-1.517	-2.209	-1.942	-2.1	-1.627	-1.363
UP-regulated	Prupe.5G108300	3.793	3.743	0.988	3.384	3.385	2.404		Down-regulated	Prupe.1G568100	-1.425	-1.362	-2.814	-1.558	-1.321	-1.51
UP-regulated	Prupe.5G120300	3.463	2.208	1.435	3.45	2.084	2.548		Down-regulated	Prupe.1G568800	-4.47	-4.496	-4.577	-4.487	-4.326	-2.808
UP-regulated	Prupe.5G195500	3.603	4.584	2.378	3.23	2.62	5.142		Down-regulated	Prupe.1G568900	-5.511	-7.241	-6.734	-6.531	-5.211	-5.414
UP-regulated	Prupe.5G233400	3.395	3.181	1.532	3.947	3.226	2.56		Down-regulated	Prupe.1G570900	-1.815	-2.124	-1.94	-2.183	-1.963	-1.666
UP-regulated	Prupe.6G042000	3.743	2.515	1.026	2.336	5.673	2.341		Down-regulated	Prupe.1G571000	-1.098	-1.423	-1.365	-1.101	-0.997	-1.254
UP-regulated	Prupe.6G189600	2.128	1.881	0.94	1.082	1.47	1.247		Down-regulated	Prupe.1G571800	-2.218	-2.099	-2.417	-2.492	-6.328	-4.669
UP-regulated	Prupe.6G242200	1.677	1.991	0.969	1.174	1.44	1.629		Down-regulated	Prupe.1G572400	-2.5	-1.987	-2.149	-1.672	-1.356	-2.341
UP-regulated	Prupe.7G023000	1.98	1.713	0.982	2.127	2.137	1.736		Down-regulated	Prupe.1G574000	-2.224	-3.051	-3.628	-2.851	-1.357	-2.242
UP-regulated	Prupe.8G100900	2.237	1.961	1.669	2.843	2.433	2.473		Down-regulated	Prupe.1G580100	-2.085	-2.112	-3.286	-2.169	-3.261	-2.148
UP-regulated	Prupe.8G116900	9.206	9.422	4.149	7.536	5.096	5.45		Down-regulated	Prupe.1G580300	-1.785	-2.256	-1.298	-3.256	-1.465	-3.127
UP-regulated	Prupe.8G119700	4.771	4.018	1.044	3.676	5.775	4.216		Down-regulated	Prupe.1G580800	-1.686	-1.625	-1.822	-1.712	-1.672	-1.509
UP-regulated	Prupe.8G201600	2.174	1.443	0.996	2.029	2.651	1.594		Down-regulated	Prupe.1G585400	-4.849	-4.248	-5.84	-6.418	-5.479	-4.603
UP-regulated	Prupe.8G205300	3.356	2.498	2.217	4.694	3.259	3.66		Down-regulated	Prupe.1G586400	-1.824	-2.262	-2.059	-1.408	-2.072	-1.864
UP-regulated	Prupe.8G247100	2.435	1.177	0.991	1.705	3.112	1.663		Down-regulated	Prupe.2G002800	-5.103	-1.932	-5.545	-5.117	-1.183	-2.394
UP-regulated	Prupe.1G002500	2.304	2.426	1.121	2.042	2.724	1.606		Down-regulated	Prupe.2G003700	-5.582	-5.503	-4.478	-4.876	-4.713	-5.985
UP-regulated	Prupe.1G004900	2.202	2.246	3.236	2.752	1.796	2.809		Down-regulated	Prupe.2G007300	-2.364	-2.519	-2.521	-2.999	-3.098	-1.506
UP-regulated	Prupe.1G016400	2.103	2.357	1.698	3.766	1.292	2.513		Down-regulated	Prupe.2G009900	-2.515	-1.811	-3.077	-3.208	-2.826	-1.067
UP-regulated	Prupe.1G016900	6.527	6.988	5.672	6.81	6.733	6.333		Down-regulated	Prupe.2G010900	-2.457	-3.022	-6.975	-9.051	-6.892	-3.106
UP-regulated	Prupe.1G017000	5.621	6.474	5.869	6.581	6.036	6.13		Down-regulated	Prupe.2G011300	-2.654	-6.082	-6.163	-6.073	-2.248	-1.698
UP-regulated	Prupe.1G018900	1.59	2.08	3.256	2.477	1.502	1.897		Down-regulated	Prupe.2G015900	-3.034	-3.261	-3.347	-2.003	-14.393	-16.595
UP-regulated	Prupe.1G019900	9.726	9.714	11.136	11.17	8.426	11.107		Down-regulated	Prupe.2G016100	-2.061	-1.998	-2.743	-1.968	-1.845	-1.306
UP-regulated	Prupe.1G020600	4.482	4.478	6.137	5.727	4.086	5.901		Down-regulated	Prupe.2G016800	-1.57	-2.195	-2.022	-3.757	-3.528	-1.744
UP-regulated	Prupe.1G022800	2.328	2.403	3.355	3.052	2.409	2.48		Down-regulated	Prupe.2G017500	-2.296	-3.002	-3.992	-4.022	-2.82	-1.591
UP-regulated	Prupe.1G025600	9.213	9.835	9.049	9.901	9.958	9.575		Down-regulated	Prupe.2G023700	-4.301	-4.959	-5.495	-4.086	-1.446	-3.385
UP-regulated	Prupe.1G026300	3.571	2.888	3.982	3.941	3.952	3.451		Down-regulated	Prupe.2G027600	-1.095	-1.001	-1.373	-1.745	-1.062	-1.098
UP-regulated	Prupe.1G027000	1.453	1.789	1.173	1.459	1.565	1.045		Down-regulated	Prupe.2G027900	-1.242	-2.224	-4.413	-4.438	-2.229	-1.674
UP-regulated	Prupe.1G027600	6.109	5.435	5.901	4.762	1.627	4.435		Down-regulated	Prupe.2G037500	-2.334	-2.408	-2.88	-1.688	-1.861	-2.048
UP-regulated	Prupe.1G028800	12.34	11.271	11.278	10.745	12.277	14.662		Down-regulated	Prupe.2G038400	-1.153	-1.392	-1.918	-1.097	-2.16	-1.918
UP-regulated	Prupe.1G030700	2.35	2.534	5.409	4.852	4.525	4.389		Down-regulated	Prupe.2G040100	-1.47	-2.439	-3.869	-3.661	-3.059	-2.12
UP-regulated	Prupe.1G030800	2.167	1.866	3.072	2.824	2.17	2.3		Down-regulated	Prupe.2G045700	-2.094	-2.908	-7.559	-5.318	-2.869	-1.804
UP-regulated	Prupe.1G033700	2.033	2.875	1.98	2.441	3.306	1.2		Down-regulated	Prupe.2G048200	-2.53	-1.299	-3.163	-2.955	-0.956	-3.152
UP-regulated	Prupe.1G033900	5.085	5.1	6.408	6.415	5.657	4.803		Down-regulated	Prupe.2G048900	-3.002	-1.211	-7.098	-3.764	-12.875	-13.22
UP-regulated	Prupe.1G034700	5.131	4.477	4.704	5.926	4.281	4.904		Down-regulated	Prupe.2G058000	-2.809	-3.022	-2.875	-1.706	-4.166	-2.242
UP-regulated	Prupe.1G035500	2.242	3.301	2.997	2.454	2.304	1.862		Down-regulated	Prupe.2G065700	-2.038	-1.459	-3.206	-2.506	-3.208	-1.367
UP-regulated	Prupe.1G035700	2.871	2.579	7.113	7.661	3.126	3.455		Down-regulated	Prupe.2G067200	-3.339	-1.813	-3.439	-4.265	-4.104	-4.449
UP-regulated	Prupe.1G036400	6.621	5.309	8.795	9.762	5.956	5.044		Down-regulated	Prupe.2G072100	-1.893	-1.652	-3.348	-2.455	-1.707	-1.616
UP-regulated	Prupe.1G038200	8.624	8.344	9.189	9.538	8.272	9.554		Down-regulated	Prupe.2G079900	-4.796	-3.404	-3.679	-4.283	-2.822	-3.705
UP-regulated	Prupe.1G038400	9.887	11.925	12.447	10.706	10.181	12.554		Down-regulated	Prupe.2G080800	-1.119	-3.698	-2.165	-1.445	-2.782	-4.438
UP-regulated	Prupe.1G039600	2.782	1.588	3.63	2.931	1.747	2.996		Down-regulated	Prupe.2G083400	-2.851	-2.697	-3.42	-2.851	-1.573	-2.883
UP-regulated	Prupe.1G042000	1.336	1.195	4.712	4.752	3.617	4.824		Down-regulated	Prupe.2G092600	-6.192	-4.375	-6.3	-6.21	-2.024	-3.539
UP-regulated	Prupe.1G045600	2.733	3.322	3.032	3.111	2.002	1.94		Down-regulated	Prupe.2G094400	-7.242	-6.12	-4.59	-5.294	-7.397	-6.053
UP-regulated	Prupe.1G046500	5.279	6.011	5.639	6.644	5.105	5.505		Down-regulated	Prupe.2G096800	-5.072	-2.938	-7.04	-6.951	-3.332	-5.274
UP-regulated	Prupe.1G048800	2.071	2.559	3.9	3.125	1.67	4.096		Down-regulated	Prupe.2G097900	-2.671	-2.445	-1.573	-1.499	-1.495	-1.828
UP-regulated	Prupe.1G049000	1.616	2.412	3.224	2.432	1.308	2.413		Down-regulated	Prupe.2G112200	-2.121	-2.269	-3.903	-4.396	-2.624	-2.004
UP-regulated	Prupe.1G049700	7.862	6.68	8.989	11.277	7.864	7.872		Down-regulated	Prupe.2G126100	-1.933	-3.192	-14.701	-6.999	-5.398	-4.387
UP-regulated	Prupe.1G053300	2.853	3.475	5.372	4.495	2.281	2.512		Down-regulated	Prupe.2G128600	-5.469	-4.983	-11.062	-10.973	-3.258	-5.534
UP-regulated	Prupe.1G054100	5.904	5.36	5.609	5.403	4.356	8.347		Down-regulated	Prupe.2G135600	-4.017	-4.341	-5.757	-4.656	-7.503	-6.257
UP-regulated	Prupe.1G057500	1.332	1.509	1.998	2.025	2.705	2.009		Down-regulated	Prupe.2G138600	-2.141	-2.752	-4.218	-4.148	-2.126	-2.373
UP-regulated	Prupe.1G058700	6.734	6.504	6.486	6.28	5.978	6.455		Down-regulated	Prupe.2G144600	-1.222	-2.486	-5.998	-1.456	-1.194	-3.25
UP-regulated	Prupe.1G066500	3.568	3.407	3.159	4.04	4.205	4.653		Down-regulated	Prupe.2G144700	-3.207	-4.723	-5.914	-3.596	-0.937	-4.145
UP-regulated	Prupe.1G069800	2.344	3.034	3.559	3.046	3.401	2.604		Down-regulated	Prupe.2G145500	-1.955	-0.979	-4.169	-2.254	-1.546	-1.469
UP-regulated	Prupe.1G070100	1.538	1.497	1.796	2.083	1.264	2.407		Down-regulated	Prupe.2G146300	-3.447	-4.304	-8.3	-4.938	-2.209	-2.767
UP-regulated	Prupe.1G072100	3.681	4.068	5.971	5.472	3.298	5.855		Down-regulated	Prupe.2G147300	-1.836	-2.552	-1.464	-2.624	-2.297	-2.668
UP-regulated	Prupe.1G076400	1.259	1.2	1.55	1.244	1.241	1.249		Down-regulated	Prupe.2G147700	-1.688	-2.843	-2.482	-2.647	-3.361	-1.247
UP-regulated	Prupe.1G080700	3.237	1.505	1.527	3.199	2.074	2.075		Down-regulated	Prupe.2G148200	-1.696	-1.897	-1.763	-2.534	-2.032	-1.215
UP-regulated	Prupe.1G081700	2.68	1.655	2.922	2.852	1.635	2.211		Down-regulated	Prupe.2G153500	-2.629	-2.428	-3.985	-4.874	-6.577	-2.483
UP-regulated	Prupe.1G086100	4.309	2.854	3.435	4.544	3.48	2.884		Down-regulated	Prupe.2G156800	-1.274	-1.24	-1.563	-1.454	-1.203	-1.124
UP-regulated	Prupe.1G090300	1.876	2.321	2.784	2.692	1.923	1.892		Down-regulated	Prupe.2G159800	-1.392	-1.707	-2.49	-2.023	-1.231	-1.706
UP-regulated	Prupe.1G092500	2.48	1.853	1.996	2.434	1.695	1.812		Down-regulated	Prupe.2G160500	-2.123	-1.628	-4.333	-2.935	-2.71	-3.326
UP-regulated	Prupe.1G093000	2.715	2.418	1.164	1.552	2.111	4.363		Down-regulated	Prupe.2G161300	-1.177	-1.035	-4.332	-3.12	-2.263	-3.996
UP-regulated	Prupe.1G093600	5.992	5.358	4.734	5.924	6.315	4.804		Down-regulated	Prupe.2G163100	-1.231	-5.108	-3.331	-3.227	-3.082	-3.438
UP-regulated	Prupe.1G094400	4.847	3.7	6.962	4.515	4.107	6.21		Down-regulated	Prupe.2G164900	-3.01	-5.876	-4.415	-3.318	-1.123	-5.137
UP-regulated	Prupe.1G095900	4.414	4.26	1.512	4.354	4.512	3.627		Down-regulated	Prupe.2G169200	-2.617	-4.96	-12.271	-7.013	-8.578	-8.507
UP-regulated	Prupe.1G097200	1.959	2.112	1.534	1.6	2.364	1.693		Down-regulated	Prupe.2G170800	-1.5	-1.753	-3.371	-1.357	-2	-2.281
UP-regulated	Prupe.1G098000	10.498	9.495	9.919	10.104	12.192	9.855		Down-regulated	Prupe.2G171500	-2.521	-3.093	-7.162	-6.07	-3.743	-4.45
UP-regulated	Prupe.1G098900	6.99	5.945	7.172	6.309	4.575	6.809		Down-regulated	Prupe.2G176700	-2.175	-3.616	-4.701	-3.973	-8.762	-7.252
UP-regulated	Prupe.1G100800	8.633	7.018	9.361	8.698	5.49	8.835		Down-regulated	Prupe.2G176900	-1.795	-2.898	-9.612	-5.529	-3.17	-4.834
UP-regulated	Prupe.1G101700	2.324	1.971	1.756	2.043	1.974	2.053		Down-regulated	Prupe.2G178700	-2.004	-4.732	-6.399	-3.99	-1.569	-2.409
UP-regulated	Prupe.1G102900	9.314	9.217	7.578	9.08	10.61	6.276		Down-regulated	Prupe.2G181700	-1.437	-1.426	-2.333	-2.668	-2.09	-2.113
UP-regulated	Prupe.1G104500	1.563	1.623	2.409	2.275	1.352	1.973		Down-regulated	Prupe.2G181800	-2.4	-2.573	-3.671	-3.315	-1.366	-3.185
UP-regulated	Prupe.1G107700	2.645	2.705	3.29	2.885	1.902	2.881		Down-regulated	Prupe.2G183500	-2.014	-3.138	-3.869	-3.407	-0.927	-2.064
UP-regulated	Prupe.1G110100	3.046	2.8	1.981	2.586	1.987	4.923		Down-regulated	Prupe.2G188400	-6.405	-6.433	-6.513	-6.423	-2.822	-6.607
UP-regulated	Prupe.1G119600	3.66	2.557	2.022	2.237	1.9	2.194		Down-regulated	Prupe.2G188500	-4.347	-3.388	-3.041	-1.774	-1.8	-1.681
UP-regulated	Prupe.1G119800	3.821	3.842	3.549	5.323	3.761	4.321		Down-regulated	Prupe.2G192800	-2.751	-3.391	-4.94	-3.945	-2.994	-2.02
UP-regulated	Prupe.1G120000	5.582	3.292	4.488	3.62	3.158	8.186		Down-regulated	Prupe.2G197000	-1.913	-1.696	-4.697	-2.537	-1.237	-2.612
UP-regulated	Prupe.1G120100	4.129	4.473	5.06	5.434	4.354	5.349		Down-regulated	Prupe.2G203700	-1.768	-1.734	-1.953	-1.95	-1.098	-1.257
UP-regulated	Prupe.1G120700	11.488	9.869	11.729	10.146	7.031	12.061		Down-regulated	Prupe.2G206000	-1.541	-1.551	-1.533	-1.503	-1.439	-1.416
UP-regulated	Prupe.1G121000	13.472	11.47	13.409	11.549	8.223	14.559		Down-regulated	Prupe.2G208800	-1.952	-2.297	-2.681	-2.618	-1.624	-1.422
UP-regulated	Prupe.1G121100	11.824	11.309	12.794	11.305	7.555	13.398		Down-regulated	Prupe.2G212000	-2.91	-2.555	-3.993	-3.616	-2.285	-2.663
UP-regulated	Prupe.1G121300	11.866	11.665	12.468	11.129	6.584	14.268		Down-regulated	Prupe.2G213400	-6.454	-2.764	-4.953	-4.133	-2.592	-5.053
UP-regulated	Prupe.1G121800	10.735	9.902	11.467	10.761	9.773	9.023		Down-regulated	Prupe.2G216900	-3.845	-2.41	-5.475	-2.376	-1.322	-2.872
UP-regulated	Prupe.1G123100	6.45	6.034	7.777	6.823	6.323	6.099		Down-regulated	Prupe.2G219600	-3.214	-3.299	-3.106	-5.425	-1.86	-1.985
UP-regulated	Prupe.1G123300	8.957	9.649	8.005	8.884	8.358	7.991		Down-regulated	Prupe.2G228600	-4.729	-6.314	-5.399	-9.167	-9.006	-9.351
UP-regulated	Prupe.1G124400	8.835	9.002	4.341	8.619	9.885	7.78		Down-regulated	Prupe.2G230300	-2.502	-1.755	-3.369	-2.987	-1.811	-2.042
UP-regulated	Prupe.1G137800	9.994	7.703	9.672	9.606	8.878	8.817		Down-regulated	Prupe.2G231500	-4.77	-1.949	-4.877	-4.787	-4.626	-2.1
UP-regulated	Prupe.1G138200	1.925	2.181	2.454	2.3	2.051	1.995		Down-regulated	Prupe.2G232000	-2.645	-2.952	-6.352	-5.57	-2.732	-1.554
UP-regulated	Prupe.1G138800	4.856	3.448	4.816	3.255	4.274	4.589		Down-regulated	Prupe.2G233700	-4.117	-2.559	-5.406	-3.918	-1.967	-4.55
UP-regulated	Prupe.1G141500	5.324	5.541	5.841	5.542	5.078	5.408		Down-regulated	Prupe.2G234200	-1.846	-3.107	-2.915	-4.595	-4.173	-5.098
UP-regulated	Prupe.1G141900	3.435	3.75	2.445	4.211	3.689	2.939		Down-regulated	Prupe.2G235900	-1.401	-1.618	-2.32	-2.134	-1.364	-1.992
UP-regulated	Prupe.1G144800	4.412	3.978	4.27	4.227	2.574	4.435		Down-regulated	Prupe.2G237000	-3.233	-3.076	-7.068	-7.228	-5.164	-2.253
UP-regulated	Prupe.1G145900	3.203	3.088	2.231	4.75	2.649	3.334		Down-regulated	Prupe.2G237500	-1.621	-2.264	-3.718	-4.004	-2.312	-1.608
UP-regulated	Prupe.1G146300	5.249	4.373	4.723	5.901	3.768	4.21		Down-regulated	Prupe.2G243900	-1.58	-2.815	-2.489	-2.652	-2.781	-1.577
UP-regulated	Prupe.1G149400	1.778	1.842	1.699	2.895	3.528	1.088		Down-regulated	Prupe.2G253400	-3.483	-3.864	-3.172	-1.443	-1.923	-3.511
UP-regulated	Prupe.1G155100	4.995	4.72	4.122	5.25	4.606	4.988		Down-regulated	Prupe.2G254200	-2.532	-3.456	-3.9	-4.284	-3.059	-1.923
UP-regulated	Prupe.1G158200	9.471	9.854	12.524	12.319	10.89	10.042		Down-regulated	Prupe.2G254700	-5.459	-5.487	-2.686	-4.584	-3.841	-2.058
UP-regulated	Prupe.1G159700	1.87	2.163	2.879	2.455	1.929	2.33		Down-regulated	Prupe.2G257000	-7.073	-5.78	-7.181	-4.836	-3.288	-5.575
UP-regulated	Prupe.1G165300	1.395	2.214	1.737	1.783	1.548	2.149		Down-regulated	Prupe.2G263000	-1.774	-3.46	-4.641	-3.275	-1.876	-2.261
UP-regulated	Prupe.1G167300	2.575	2.572	3.117	3.111	2.094	2.59		Down-regulated	Prupe.2G263600	-3.847	-4.117	-5.292	-3.658	-2.098	-3.298
UP-regulated	Prupe.1G179900	3.431	3.16	3.014	4.745	2.874	4.282		Down-regulated	Prupe.2G266000	-2.979	-3.339	-4.175	-4.491	-2.97	-2.343
UP-regulated	Prupe.1G184900	3.053	2.609	2.219	1.606	2.272	1.979		Down-regulated	Prupe.2G267800	-1.586	-1.556	-1.531	-1.572	-1.557	-1.081
UP-regulated	Prupe.1G187200	4.847	4.944	3.871	5.304	5.354	3.94		Down-regulated	Prupe.2G268900	-3.109	-3.608	-3.237	-1.802	-1.219	-2.515
UP-regulated	Prupe.1G190000	1.653	1.83	3.863	3.544	1.696	2.251		Down-regulated	Prupe.2G275400	-1.575	-0.995	-1.387	-1.177	-1.241	-1.692
UP-regulated	Prupe.1G196200	5.952	6.294	2.492	5.717	6.15	5.097		Down-regulated	Prupe.2G276100	-1.66	-0.994	-2.572	-2.469	-0.776	-1.862
UP-regulated	Prupe.1G199700	4.233	4.177	3.509	4.007	3.845	2.671		Down-regulated	Prupe.2G276200	-2.207	-2.957	-4.538	-4.321	-0.807	-2.915
UP-regulated	Prupe.1G203000	1.277	2.126	2.783	2.42	2.158	2.428		Down-regulated	Prupe.2G276400	-2.11	-2.281	-3.607	-3.324	-2.466	-1.699
UP-regulated	Prupe.1G205400	3.637	3.003	3.347	4.972	9.217	7.868		Down-regulated	Prupe.2G278000	-2.353	-2.694	-3.692	-3.107	-1.087	-2.495
UP-regulated	Prupe.1G211000	2.462	2.598	1.035	1.729	2.569	1.367		Down-regulated	Prupe.2G278700	-6.104	-6.258	-8.234	-6.208	-3.456	-6.88
UP-regulated	Prupe.1G211200	1.95	1.792	1.322	2.351	1.615	2.089		Down-regulated	Prupe.2G279800	-6.901	-9.01	-7.246	-5.404	-1.885	-7.863
UP-regulated	Prupe.1G211700	3.345	2.72	2.23	2.395	2.753	2.855		Down-regulated	Prupe.2G279900	-2.187	-3.089	-3.974	-3.276	-2.864	-2.522
UP-regulated	Prupe.1G211900	3.619	4.4	5.795	4.876	3.331	5.249		Down-regulated	Prupe.2G282400	-1.974	-2.607	-3.527	-3.748	-2.563	-1.357
UP-regulated	Prupe.1G212100	2.614	2.926	1.91	2.251	2.944	2.247		Down-regulated	Prupe.2G288500	-1.013	-1.627	-6.162	-6.073	-5.912	-6.257
UP-regulated	Prupe.1G213600	3.98	3.402	4.891	4.111	2.111	4.221		Down-regulated	Prupe.2G290800	-1.556	-1.067	-1.34	-1.604	-1.456	-1.536
UP-regulated	Prupe.1G214700	2.957	3.124	4.587	3.461	2.01	3.854		Down-regulated	Prupe.2G291600	-2.344	-2.37	-2.451	-2.36	-2.199	-2.544
UP-regulated	Prupe.1G218100	3.909	4.778	5.157	5.248	4.084	3.352		Down-regulated	Prupe.2G292700	-1.318	-1.808	-1.886	-1.883	-1.56	-1.161
UP-regulated	Prupe.1G218500	10.235	10.12	2.639	5.883	8.158	7.405		Down-regulated	Prupe.2G294800	-0.991	-1.759	-1.691	-1.702	-1.811	-1.14
UP-regulated	Prupe.1G221100	4.919	3.415	2.984	5.045	3.3	5.965		Down-regulated	Prupe.2G297200	-2.042	-2.376	-3.135	-3.309	-2.188	-1.42
UP-regulated	Prupe.1G222200	6.662	5.658	3.979	4.418	3.74	6.136		Down-regulated	Prupe.2G301000	-4.265	-5.879	-8.811	-7.759	-5.702	-5.046
UP-regulated	Prupe.1G225100	6.298	5.846	8.208	6.097	4.565	5.861		Down-regulated	Prupe.2G301800	-3.809	-1.137	-3.111	-2.117	-4.188	-1.104
UP-regulated	Prupe.1G225600	2.763	2.428	1.003	2.959	2.541	1.894		Down-regulated	Prupe.2G304900	-2.066	-2.572	-4.544	-4.018	-3.057	-1.692
UP-regulated	Prupe.1G226100	1.88	1.664	2.729	1.191	1.96	1.448		Down-regulated	Prupe.2G306800	-2.975	-3.228	-3.893	-2.863	-2.829	-2.972
UP-regulated	Prupe.1G226500	11.311	9.953	12.713	12.44	10.304	10.261		Down-regulated	Prupe.2G306900	-5.191	-3.06	-6.301	-4.175	-4.908	-3.162
UP-regulated	Prupe.1G230200	1.734	1.925	1.933	1.535	1.842	1.427		Down-regulated	Prupe.2G309600	-1.756	-1.202	-1.157	-1.561	-1.03	-2.975
UP-regulated	Prupe.1G230900	10.035	10.057	10.784	11.587	11.097	9.527		Down-regulated	Prupe.2G311400	-2.437	-2.26	-1.955	-2.145	-2.532	-2.247
UP-regulated	Prupe.1G231300	7.889	8.735	11.128	10.413	8.615	9.461		Down-regulated	Prupe.2G311600	-1.424	-1.407	-2.228	-1.498	-0.976	-1.577
UP-regulated	Prupe.1G236800	6.054	5.268	3.382	5.22	4.528	4.998		Down-regulated	Prupe.2G314500	-1.564	-1.797	-2.075	-2.128	-2.152	-1.128
UP-regulated	Prupe.1G239600	2.266	2.925	4.136	2.755	1.779	5.262		Down-regulated	Prupe.2G316000	-2.719	-1.793	-3.801	-2.949	-0.933	-2.544
UP-regulated	Prupe.1G244500	1.926	2.79	3.433	2.747	2.264	2.287		Down-regulated	Prupe.2G319800	-1.323	-1.653	-2.011	-1.467	-1.428	-1.524
UP-regulated	Prupe.1G245200	7.111	5.988	6.81	5.615	6.295	7.462		Down-regulated	Prupe.2G324100	-2.508	-2.965	-3.988	-4.721	-3.004	-1.451
UP-regulated	Prupe.1G248900	2.12	2.395	2.422	2.371	1.761	2.125		Down-regulated	Prupe.2G327000	-5.109	-2.664	-4.711	-3.125	-2.525	-3.8
UP-regulated	Prupe.1G252100	2.391	2.249	1.993	1.945	2.489	2.202		Down-regulated	Prupe.3G001100	-4.936	-3.127	-5.044	-3.083	-4.793	-1.27
UP-regulated	Prupe.1G252200	3.426	2.996	3.49	4.057	3.547	3.936		Down-regulated	Prupe.3G001600	-1.704	-2.006	-1.566	-2.238	-2.224	-1.393
UP-regulated	Prupe.1G253100	2.253	2.454	1.803	3.254	2.04	1.96		Down-regulated	Prupe.3G001800	-3.175	-4.662	-11.382	-11.292	-9.273	-4.124
UP-regulated	Prupe.1G255000	1.98	2.176	1.886	3.936	2.039	2.561		Down-regulated	Prupe.3G002400	-2.969	-3.283	-4.929	-5.714	-3.145	-2.245
UP-regulated	Prupe.1G255500	2.607	1.961	2.827	1.947	2.196	3.179		Down-regulated	Prupe.3G003300	-2.279	-2.93	-4.045	-3.085	-2.311	-2.028
UP-regulated	Prupe.1G256900	5.879	6.121	6.628	5.228	5.355	6.278		Down-regulated	Prupe.3G004900	-4.843	-6.553	-7.447	-5.573	-2.862	-5.416
UP-regulated	Prupe.1G257000	2.097	3.127	2.579	2.049	3.105	2.133		Down-regulated	Prupe.3G006700	-3.379	-2.529	-6.077	-3.694	-3.917	-2.952
UP-regulated	Prupe.1G257200	3.986	3.867	1.634	3.144	3.419	3.27		Down-regulated	Prupe.3G007200	-2.317	-1.887	-3.909	-3.472	-1.419	-1.884
UP-regulated	Prupe.1G257700	2.372	2.737	1.812	1.24	1.521	1.7		Down-regulated	Prupe.3G008400	-3.831	-10.21	-10.291	-10.201	-10.04	-8.527
UP-regulated	Prupe.1G258800	4.638	4.928	5.016	3.61	3.747	4.73		Down-regulated	Prupe.3G008900	-1.342	-1.775	-3.027	-2.784	-2.327	-2.196
UP-regulated	Prupe.1G260400	14.452	14.28	6.429	8.868	11.475	10.867		Down-regulated	Prupe.3G017700	-2.265	-2.226	-2.854	-2.89	-2.322	-1.703
UP-regulated	Prupe.1G261100	5.289	5.204	2.359	5.648	4.786	4.771		Down-regulated	Prupe.3G017900	-4.824	-4.03	-5.853	-4.731	-3.479	-4.625
UP-regulated	Prupe.1G261200	5.57	7.476	5.355	9.421	5.304	6.78		Down-regulated	Prupe.3G020900	-1.854	-1.996	-1.532	-1.203	-0.84	-1.9
UP-regulated	Prupe.1G263400	2.556	2.974	4.353	4.525	3.827	4.233		Down-regulated	Prupe.3G022200	-1.924	-0.965	-1.53	-1.141	-1.144	-1.109
UP-regulated	Prupe.1G265600	10.053	9.788	10.641	8.938	7.24	11.574		Down-regulated	Prupe.3G024500	-3.011	-2.676	-2.498	-6.851	-1.518	-7.035
UP-regulated	Prupe.1G268300	1.555	1.805	1.487	1.306	1.296	1.129		Down-regulated	Prupe.3G028700	-2.521	-2.625	-3.942	-3.323	-1.187	-2.469
UP-regulated	Prupe.1G269300	3.412	3.824	4.242	4.217	4.236	4.132		Down-regulated	Prupe.3G030600	-2.323	-2.548	-4.92	-4.627	-5.584	-1.875
UP-regulated	Prupe.1G270700	1.445	1.584	1.194	1.448	1.452	1.035		Down-regulated	Prupe.3G031000	-1.714	-2.044	-2.959	-2.133	-0.997	-1.077
UP-regulated	Prupe.1G271300	2.66	2.445	3.038	2.688	2.599	2.533		Down-regulated	Prupe.3G035600	-5.762	-5.078	-5.052	-4.529	-6.615	-5.502
UP-regulated	Prupe.1G275700	2.912	2.343	1.09	2.414	3.078	2.026		Down-regulated	Prupe.3G040600	-5.078	-5.285	-7.194	-6.341	-3.748	-4.233
UP-regulated	Prupe.1G279300	1.749	1.21	1.682	1.381	1.78	1.11		Down-regulated	Prupe.3G046800	-2.679	-2.982	-5.115	-4.887	-2.513	-2.27
UP-regulated	Prupe.1G280600	3.264	3.546	3.938	4.183	4.149	3.078		Down-regulated	Prupe.3G057400	-2.462	-2.163	-3.862	-3.368	-3.551	-1.884
UP-regulated	Prupe.1G288800	1.66	1.389	1.446	1.949	2.163	1.656		Down-regulated	Prupe.3G057600	-2.502	-2.706	-2.459	-2.172	-0.986	-3.191
UP-regulated	Prupe.1G290400	8.462	5.11	7.622	6.025	3.929	8.284		Down-regulated	Prupe.3G058900	-2.564	-2.142	-4.829	-2.781	-2.944	-1.764
UP-regulated	Prupe.1G292400	6.918	6.731	2.169	4.512	6.504	5.427		Down-regulated	Prupe.3G069100	-1.617	-2.142	-3.257	-3.007	-3.142	-2.394
UP-regulated	Prupe.1G292500	3.576	3.039	1.334	2.466	3.182	1.218		Down-regulated	Prupe.3G070900	-4.14	-2.357	-3.597	-3.629	-1.854	-2.869
UP-regulated	Prupe.1G293100	7.121	7.187	7.126	6.852	3.813	6.522		Down-regulated	Prupe.3G071000	-2.127	-2.02	-4.17	-3.145	-2.567	-2.006
UP-regulated	Prupe.1G294500	3.367	3.51	1.412	3.664	3.826	2.612		Down-regulated	Prupe.3G074800	-4.193	-5.602	-10.263	-9.243	-6.334	-3.699
UP-regulated	Prupe.1G294700	2.935	3.565	2.888	3.81	4.343	3.019		Down-regulated	Prupe.3G074900	-2.814	-3.567	-5.599	-4.2	-2.746	-3.641
UP-regulated	Prupe.1G294800	2.24	2.774	3.231	3.526	3.897	2.246		Down-regulated	Prupe.3G075000	-3.073	-2.32	-5.563	-1.089	-4.735	-2.76
UP-regulated	Prupe.1G295900	2.051	2.546	3.514	3.879	2.748	2.014		Down-regulated	Prupe.3G077300	-2.434	-3.256	-4.143	-4.414	-2.153	-1.066
UP-regulated	Prupe.1G296000	3.236	3.955	4.487	4.46	4.041	3.006		Down-regulated	Prupe.3G077800	-3.744	-3.167	-4.384	-3.574	-4.718	-2.95
UP-regulated	Prupe.1G298800	4.976	4.963	6.553	5.452	4.781	6.791		Down-regulated	Prupe.3G078400	-2.878	-3.647	-4.744	-2.604	-3.157	-4.179
UP-regulated	Prupe.1G301900	7.013	5.825	9.199	7.558	5.708	8.188		Down-regulated	Prupe.3G079300	-4.412	-7.255	-7.335	-7.246	-7.085	-7.429
UP-regulated	Prupe.1G302400	12.009	9.985	10.929	9.74	4.9	12.929		Down-regulated	Prupe.3G079400	-2.592	-3.073	-2.465	-3.781	-2.352	-2.433
UP-regulated	Prupe.1G305100	1.211	1.502	1.444	2.049	1.467	1.143		Down-regulated	Prupe.3G079500	-2.358	-2.314	-2.242	-2.743	-0.917	-1.417
UP-regulated	Prupe.1G305500	1.678	2.609	3.537	2.287	1.998	3.196		Down-regulated	Prupe.3G081700	-1.274	-1.215	-1.38	-1.304	-1.334	-1.132
UP-regulated	Prupe.1G307800	5.468	6.831	7.079	5.593	4.638	5.483		Down-regulated	Prupe.3G081900	-1.86	-1.378	-4.866	-4.776	-4.615	-4.96
UP-regulated	Prupe.1G309300	4.889	5.598	5.615	5.544	5.846	5.095		Down-regulated	Prupe.3G088400	-2.234	-2.209	-2.674	-3.152	-2.564	-2.525
UP-regulated	Prupe.1G311400	2.073	4.436	4.521	4.109	1.246	3.795		Down-regulated	Prupe.3G088600	-1.247	-1.916	-1.498	-1.483	-1.173	-1.068
UP-regulated	Prupe.1G314600	4.547	4.817	1.425	3.665	3.709	3.672		Down-regulated	Prupe.3G092600	-1.19	-1.522	-1.571	-1.275	-1.07	-1.306
UP-regulated	Prupe.1G318700	2.661	2.332	3.82	3.55	1.345	3.306		Down-regulated	Prupe.3G104500	-1.605	-3.665	-4.601	-4.926	-4.022	-1.084
UP-regulated	Prupe.1G318800	2.654	2.998	3.673	3.312	1.529	1.861		Down-regulated	Prupe.3G106100	-1.306	-1.031	-1.62	-1.286	-0.958	-1.419
UP-regulated	Prupe.1G319000	2.636	3.191	1.343	3.957	2.284	2.882		Down-regulated	Prupe.3G113500	-2.999	-3.733	-3.848	-2.773	-1.617	-3.419
UP-regulated	Prupe.1G319700	2.334	2.497	1.975	1.936	1.67	2.559		Down-regulated	Prupe.3G119900	-3	-4.163	-5.42	-1.951	-8.024	-8.368
UP-regulated	Prupe.1G320500	2.234	3.329	3.712	3.271	2.877	3.072		Down-regulated	Prupe.3G121600	-1.484	-2.167	-2.132	-1.777	-1.319	-1.145
UP-regulated	Prupe.1G321600	3.614	3.654	2.282	4.802	3.271	3.476		Down-regulated	Prupe.3G125700	-2.201	-1.69	-4.577	-1.227	-1.627	-1.759
UP-regulated	Prupe.1G321900	8.145	7.73	8.171	7.715	6.229	7.897		Down-regulated	Prupe.3G131000	-1.348	-2.165	-1.874	-1.043	-0.884	-1.635
UP-regulated	Prupe.1G322500	3.763	3.904	1.449	4.079	4.639	2.558		Down-regulated	Prupe.3G132900	-2.001	-3.074	-4.652	-5.012	-2.907	-1.622
UP-regulated	Prupe.1G323000	1.807	1.758	1.936	1.887	2.863	1.469		Down-regulated	Prupe.3G137600	-1.435	-1.264	-1.379	-1.63	-1.362	-1.331
UP-regulated	Prupe.1G324300	2.767	2.451	1.713	1.79	2.908	1.999		Down-regulated	Prupe.3G140100	-3.111	-3.903	-1.164	-1.665	-8.628	-9.15
UP-regulated	Prupe.1G328600	9.228	9.172	8.834	9.803	6.393	8.827		Down-regulated	Prupe.3G140300	-2.694	-3.267	-4.473	-4.474	-3.292	-1.808
UP-regulated	Prupe.1G328800	8.159	8.815	7.787	8.227	6.975	7.973		Down-regulated	Prupe.3G141400	-3.306	-3.235	-4.048	-3.151	-1.303	-3.394
UP-regulated	Prupe.1G331100	3.339	2.314	1.549	2.629	2.689	2.152		Down-regulated	Prupe.3G143400	-3.909	-4.832	-6.937	-5.302	-2.868	-3.293
UP-regulated	Prupe.1G332000	3.773	2.918	1.395	1.757	3.01	1.935		Down-regulated	Prupe.3G143800	-3.26	-3.863	-3.414	-2.145	-3.001	-3.181
UP-regulated	Prupe.1G332500	7.709	8.107	5.951	8.551	6.598	7.134		Down-regulated	Prupe.3G152600	-2.708	-1.982	-3.97	-4.872	-1.579	-3.61
UP-regulated	Prupe.1G334000	3.35	3.045	3.422	4.643	1.927	3.392		Down-regulated	Prupe.3G152700	-3.069	-3.06	-2.914	-3.021	-4.449	-3.797
UP-regulated	Prupe.1G348000	10.107	10.942	9.78	10.558	10.28	10.268		Down-regulated	Prupe.3G156100	-1.009	-1.583	-1.629	-1.869	-1.11	-1.415
UP-regulated	Prupe.1G348700	1.835	1.868	3.833	3.322	2.209	3.378		Down-regulated	Prupe.3G156600	-2.166	-2.768	-1.912	-1.738	-2.838	-2.567
UP-regulated	Prupe.1G349500	8.107	7.022	7.26	7.213	5.54	8.296		Down-regulated	Prupe.3G159500	-3.538	-1.908	-5.449	-3.497	-5.198	-5.544
UP-regulated	Prupe.1G350900	2.034	2.496	2.788	2.285	1.925	2.597		Down-regulated	Prupe.3G161500	-3.158	-3.478	-5.714	-3.916	-3.155	-2.451
UP-regulated	Prupe.1G353300	5.651	6.084	8.006	6.905	4.459	6.692		Down-regulated	Prupe.3G164800	-2.58	-2.638	-1.558	-1.769	-2.103	-3.429
UP-regulated	Prupe.1G354400	8.09	11.2	10.688	10.165	8.051	7.57		Down-regulated	Prupe.3G165100	-5.18	-2.368	-2.455	-5.199	-3.182	-3.52
UP-regulated	Prupe.1G355900	4.669	4.451	2.696	3.503	3.986	3.416		Down-regulated	Prupe.3G165500	-1.653	-1.151	-1.72	-1.722	-1.008	-1.484
UP-regulated	Prupe.1G356000	6.004	5.527	6.5	6.335	3.637	5.527		Down-regulated	Prupe.3G168200	-3.456	-2.575	-2.869	-1.948	-3.309	-2.334
UP-regulated	Prupe.1G356500	4.161	4.911	5.038	5.359	3.499	3.17		Down-regulated	Prupe.3G169100	-3.297	-3.968	-6.449	-4.551	-3.386	-3.083
UP-regulated	Prupe.1G358100	1.374	1.417	3.057	2.403	2.622	2.811		Down-regulated	Prupe.3G172700	-3.259	-1.709	-3.445	-3.267	-2.335	-2.793
UP-regulated	Prupe.1G359300	2.45	2.238	1.884	2.614	3.564	2.426		Down-regulated	Prupe.3G173200	-1.442	-1.506	-2.455	-2.393	-0.91	-1.732
UP-regulated	Prupe.1G360200	3.143	2.215	1.495	1.699	2.701	1.911		Down-regulated	Prupe.3G173300	-1.137	-1.348	-2.977	-2.935	-1.527	-1.99
UP-regulated	Prupe.1G362100	8.151	7.151	7.806	7.999	6.254	8.097		Down-regulated	Prupe.3G176300	-2.98	-3.356	-5.159	-4.503	-2.072	-1.396
UP-regulated	Prupe.1G362600	6.323	6.567	1.261	3.447	4.198	4.123		Down-regulated	Prupe.3G178400	-2.792	-3.631	-4.584	-4.872	-2.675	-2.225
UP-regulated	Prupe.1G365700	2.694	3.357	3.202	3.124	2.834	2.957		Down-regulated	Prupe.3G180000	-1.402	-1.681	-1.543	-1.139	-1.278	-1.239
UP-regulated	Prupe.1G371600	2.297	1.968	2.323	2.437	1.998	2.125		Down-regulated	Prupe.3G180600	-2.06	-3.955	-7.206	-8.972	-8.811	-3.906
UP-regulated	Prupe.1G373300	3.822	3.201	2.876	3.302	3.361	2.213		Down-regulated	Prupe.3G184300	-1.328	-2.242	-2.712	-2.522	-2.17	-1.303
UP-regulated	Prupe.1G385900	6.601	6.932	1.741	4.832	3.922	5.011		Down-regulated	Prupe.3G185100	-1.462	-2.723	-8.479	-2.772	-0.946	-9.535
UP-regulated	Prupe.1G386200	4.559	4.817	2.515	3.273	2.82	3.24		Down-regulated	Prupe.3G188600	-1.897	-1.601	-9.396	-7.986	-3.456	-2.233
UP-regulated	Prupe.1G386300	5.238	5.292	2.235	3.875	4.145	3.931		Down-regulated	Prupe.3G189400	-3.57	-3.697	-5.055	-6.41	-3.161	-2.828
UP-regulated	Prupe.1G386900	2.648	4.052	3.561	3.97	2.916	3.366		Down-regulated	Prupe.3G189600	-2.993	-1.822	-1.942	-2.236	-1.81	-2.224
UP-regulated	Prupe.1G387000	1.701	2.062	3.35	3.299	2.354	2.403		Down-regulated	Prupe.3G190900	-4.976	-4.034	-4.775	-1.622	-2.941	-8.05
UP-regulated	Prupe.1G392600	1.903	1.411	2.366	2.09	1.344	1.619		Down-regulated	Prupe.3G192200	-2.695	-3.157	-4.7	-4.816	-2.711	-2.393
UP-regulated	Prupe.1G396300	1.716	1.89	2.078	2.251	2.214	1.667		Down-regulated	Prupe.3G193300	-5.09	-3.266	-2.316	-5.108	-4.947	-5.292
UP-regulated	Prupe.1G397100	1.716	1.587	2.002	1.728	1.236	2.337		Down-regulated	Prupe.3G197400	-3.772	-3.724	-4.405	-5.115	-5.76	-2.268
UP-regulated	Prupe.1G397700	4.998	3.094	3.48	3.777	3.212	5.439		Down-regulated	Prupe.3G197900	-2.947	-2.423	-5.06	-6.289	-5.127	-2.768
UP-regulated	Prupe.1G402700	7.54	7.707	7.637	8.473	7.383	6.754		Down-regulated	Prupe.3G199200	-3.47	-3.046	-3.476	-1.883	-1.213	-4.261
UP-regulated	Prupe.1G403000	5.287	4.047	4.022	4.782	4.936	3.932		Down-regulated	Prupe.3G199800	-4.625	-7.537	-5.766	-5.676	-7.367	-7.712
UP-regulated	Prupe.1G404300	2.942	3.518	4.471	4.784	3.879	3.722		Down-regulated	Prupe.3G201800	-4.693	-6.2	-7.865	-4.667	-4.507	-3.939
UP-regulated	Prupe.1G409700	6.7	5.69	4.951	7.578	5.316	5.673		Down-regulated	Prupe.3G202400	-4.565	-3.389	-5.761	-4.432	-3.262	-3.643
UP-regulated	Prupe.1G409800	4.361	5.239	2.751	7.132	4.193	5.954		Down-regulated	Prupe.3G202500	-1.967	-3.043	-4.148	-4.164	-1.979	-1.867
UP-regulated	Prupe.1G410300	4.371	4.159	5.18	4.495	2.93	3.421		Down-regulated	Prupe.3G205900	-1.714	-1.308	-4.652	-4.802	-1.481	-1.07
UP-regulated	Prupe.1G418300	2.01	2.147	1.284	2.025	2	1.625		Down-regulated	Prupe.3G209900	-1.932	-1.769	-3.277	-2.667	-2.208	-3.147
UP-regulated	Prupe.1G419500	1.562	2.572	3.258	3.931	2.653	2.234		Down-regulated	Prupe.3G210100	-1.055	-2.099	-4.559	-3.766	-4.121	-1.176
UP-regulated	Prupe.1G420000	5.115	4.904	3.657	4.487	2.234	3.487		Down-regulated	Prupe.3G212200	-3.173	-3.374	-3.399	-2.432	-2.748	-2.3
UP-regulated	Prupe.1G420700	3.706	2.972	2.406	2.339	3.497	3.094		Down-regulated	Prupe.3G213400	-1.112	-2.556	-4.312	-3.545	-2.907	-2.086
UP-regulated	Prupe.1G421500	2.896	4.181	3.829	3.335	2.684	3.953		Down-regulated	Prupe.3G213700	-2.359	-2.356	-3.514	-3.292	-2.49	-2.205
UP-regulated	Prupe.1G423300	3.531	3.392	2.397	2.852	2.127	2.982		Down-regulated	Prupe.3G217500	-1.926	-1.561	-2.542	-2.45	-1.39	-2.247
UP-regulated	Prupe.1G426200	1.491	1.297	1.442	1.573	1.513	1.171		Down-regulated	Prupe.3G218700	-1.763	-1.779	-3.544	-3.075	-2.222	-3.123
UP-regulated	Prupe.1G427700	11.208	12.262	13.037	11.905	7.151	6.44		Down-regulated	Prupe.3G222900	-1.615	-1.471	-1.77	-4.246	-5.101	-3.63
UP-regulated	Prupe.1G429900	4.256	4.402	1.12	4.098	3.531	3.395		Down-regulated	Prupe.3G225700	-3.641	-6.824	-6.438	-7.133	-8.972	-5.924
UP-regulated	Prupe.1G433300	10.281	10.875	10.912	10.603	9.68	11.495		Down-regulated	Prupe.3G231100	-1.665	-1.92	-3.344	-3.613	-2.31	-2.061
UP-regulated	Prupe.1G433400	6.804	7.445	6.975	6.021	7.287	7.297		Down-regulated	Prupe.3G233400	-2.179	-2.908	-3.986	-3.891	-2.927	-2.77
UP-regulated	Prupe.1G435400	1.231	1.786	2.546	1.779	1.641	2.441		Down-regulated	Prupe.3G242700	-2.478	-3.611	-4.48	-4.478	-3.288	-2.081
UP-regulated	Prupe.1G435900	2.452	2.928	3.477	3.12	2.65	2.93		Down-regulated	Prupe.3G254700	-2.977	-1.841	-1.893	-2.192	-0.996	-3.131
UP-regulated	Prupe.1G436200	4.861	4.633	4.296	4.602	4.512	4.758		Down-regulated	Prupe.3G254900	-2.657	-3.479	-7.099	-5.593	-2.861	-2.085
UP-regulated	Prupe.1G439700	8.209	6.575	7.048	8.573	5.79	7.758		Down-regulated	Prupe.3G257100	-2.246	-3.029	-4.077	-3.968	-2.03	-1.67
UP-regulated	Prupe.1G439800	1.614	2.043	2.024	1.353	2.026	1.208		Down-regulated	Prupe.3G261600	-1.935	-2.347	-2.87	-2.337	-1.872	-1.447
UP-regulated	Prupe.1G441200	2.155	2.096	5.618	4.958	5.5	5.137		Down-regulated	Prupe.3G262300	-1.606	-1.675	-1.913	-1.725	-1.263	-1.702
UP-regulated	Prupe.1G441600	6.881	6.164	8.829	7.149	4.877	8.369		Down-regulated	Prupe.3G264400	-0.961	-1.925	-1.749	-1.601	-0.985	-1.481
UP-regulated	Prupe.1G441800	6.885	7.435	7.096	8.44	4.879	6.686		Down-regulated	Prupe.3G267300	-1.757	-1.721	-1.753	-1.899	-2.23	-1.47
UP-regulated	Prupe.1G445000	8.084	6.757	7.644	6.996	2.847	7.403		Down-regulated	Prupe.3G269300	-2.017	-2.947	-4.693	-4.746	-2.805	-1.346
UP-regulated	Prupe.1G449200	3.877	5.181	5.846	5.334	3.187	5.33		Down-regulated	Prupe.3G273500	-2.697	-2.462	-2.892	-2.021	-1.202	-3.037
UP-regulated	Prupe.1G451100	2.59	1.983	3.047	3.617	1.99	3.142		Down-regulated	Prupe.3G275800	-1.186	-1.122	-2.088	-1.436	-1.297	-1.122
UP-regulated	Prupe.1G455900	1.895	1.533	1.96	1.749	2.068	1.79		Down-regulated	Prupe.3G287200	-2.554	-3.027	-4.93	-2.865	-5.243	-2.164
UP-regulated	Prupe.1G457900	5.488	6.022	5.427	6.94	4.592	5.453		Down-regulated	Prupe.3G288600	-3.701	-3.529	-4.736	-4.258	-1.677	-3.943
UP-regulated	Prupe.1G458500	4.243	5.622	3.69	4.492	4.701	4.65		Down-regulated	Prupe.3G288900	-2.739	-2.327	-3.517	-3.607	-3.849	-3.192
UP-regulated	Prupe.1G460000	3.898	4.442	1.372	4.356	3.165	3.541		Down-regulated	Prupe.3G289900	-1.54	-3.702	-4.809	-3.526	-1.52	-3.274
UP-regulated	Prupe.1G460200	1.342	1.129	1.308	1.064	1.418	1.134		Down-regulated	Prupe.3G291000	-2.876	-2.754	-3.01	-3.66	-2.827	-2.079
UP-regulated	Prupe.1G465600	5.172	8.316	9.74	7.384	6.445	8.878		Down-regulated	Prupe.3G295600	-5.922	-4.265	-13.162	-12.073	-10.326	-4.443
UP-regulated	Prupe.1G468900	7.689	7.052	5.412	6.691	6.704	5.657		Down-regulated	Prupe.3G298300	-1.273	-2.923	-3.481	-2.182	-1.585	-2.336
UP-regulated	Prupe.1G469700	6.746	8.82	11.549	7.179	6.308	8.792		Down-regulated	Prupe.3G302100	-2.802	-0.92	-2.911	-2.822	-2.661	-2.042
UP-regulated	Prupe.1G475800	5.553	7.318	10.249	7.413	8.829	9.896		Down-regulated	Prupe.3G306600	-2.391	-3.107	-4.748	-4.119	-1.675	-1.927
UP-regulated	Prupe.1G478500	3.68	1.933	2.955	2.643	3.194	2.341		Down-regulated	Prupe.3G308500	-2.456	-1.37	-1.92	-2.742	-2.576	-1.484
UP-regulated	Prupe.1G482300	1.846	3.078	3.621	3.548	1.234	2.558		Down-regulated	Prupe.3G310400	-3.051	-2.042	-5.735	-3.561	-1.878	-2.667
UP-regulated	Prupe.1G486000	6.089	6.31	5.226	6.969	5.986	5.926		Down-regulated	Prupe.3G311300	-2.295	-1.415	-2.575	-3.385	-3.476	-1.106
UP-regulated	Prupe.1G488100	8.986	9.297	9.768	8.398	5.785	7.706		Down-regulated	Prupe.3G312700	-1.344	-1.995	-2.736	-2.001	-1.486	-1.449
UP-regulated	Prupe.1G488200	6.049	10.825	7.02	6.428	6.133	7.021		Down-regulated	Prupe.4G000100	-2.513	-3.468	-4.535	-5.231	-3.105	-2.157
UP-regulated	Prupe.1G488300	6.36	8.389	5.83	4.672	4.414	7.024		Down-regulated	Prupe.4G002200	-1.334	-1.277	-1.502	-1.01	-0.909	-1.195
UP-regulated	Prupe.1G491300	5.618	6.324	5.159	5.352	4.487	3.785		Down-regulated	Prupe.4G002400	-2.647	-3.1	-2.24	-3.191	-3.265	-1.516
UP-regulated	Prupe.1G494400	3.545	3.195	1.001	1.658	3.232	1.97		Down-regulated	Prupe.4G006700	-2.214	-2.286	-2.606	-2.457	-1.964	-1.963
UP-regulated	Prupe.1G496500	2.556	2.379	2.957	2.713	1.343	2.31		Down-regulated	Prupe.4G006900	-3.867	-3.039	-4.947	-4.608	-3.583	-2.454
UP-regulated	Prupe.1G498400	14.312	12.82	13.949	13.2	8.128	15.129		Down-regulated	Prupe.4G008900	-1.542	-1.54	-2.793	-2.121	-0.898	-1.781
UP-regulated	Prupe.1G498600	11.392	10.693	11.996	11.343	6.725	13.018		Down-regulated	Prupe.4G010900	-2.746	-1.3	-2.675	-1.932	-2.7	-1.699
UP-regulated	Prupe.1G498700	13.662	12.604	13.61	12.722	7.582	14.529		Down-regulated	Prupe.4G013000	-2.332	-2.584	-2.885	-2.892	-1.838	-1.424
UP-regulated	Prupe.1G498800	13.734	12.216	13.306	12.423	7.777	14.607		Down-regulated	Prupe.4G015800	-2.512	-1.72	-4.409	-8.871	-4.269	-4.614
UP-regulated	Prupe.1G498900	13.768	12.863	12.253	11.632	6.949	14.693		Down-regulated	Prupe.4G018100	-1.783	-1.509	-1.327	-1.259	-1.066	-1.572
UP-regulated	Prupe.1G503100	7.802	9.343	10.02	8.889	7.249	8.536		Down-regulated	Prupe.4G018800	-1.545	-1.849	-3.57	-2.585	-1.159	-1.189
UP-regulated	Prupe.1G511600	6.281	7.283	8.244	6.619	4.204	8.14		Down-regulated	Prupe.4G019700	-3.446	-4.747	-5.145	-5.157	-2.75	-3.387
UP-regulated	Prupe.1G512200	4.181	6.15	7.709	5.907	3.575	6.841		Down-regulated	Prupe.4G022600	-1.251	-1.006	-1.185	-1.268	-1.236	-1.067
UP-regulated	Prupe.1G518600	4.552	5.004	5.287	5.639	4.626	5.05		Down-regulated	Prupe.4G023200	-3.659	-1.67	-5.048	-4.992	-3.807	-3.262
UP-regulated	Prupe.1G519800	1.865	2.311	2.358	1.07	1.737	2.429		Down-regulated	Prupe.4G024100	-1.513	-1.057	-1.569	-1.275	-1.59	-1.472
UP-regulated	Prupe.1G522800	2.421	2.207	1.172	4.269	2.85	2.609		Down-regulated	Prupe.4G027500	-2.802	-0.963	-2.911	-2.822	-2.661	-3.005
UP-regulated	Prupe.1G524700	3.748	3.807	2.993	4.25	2.855	3.174		Down-regulated	Prupe.4G028500	-7.817	-1.19	-7.924	-7.835	-7.674	-8.019
UP-regulated	Prupe.1G536500	1.966	1.924	1.922	2.744	2.444	1.806		Down-regulated	Prupe.4G029200	-2.37	-2.984	-3.82	-4.079	-2.913	-1.622
UP-regulated	Prupe.1G536700	9.77	6.853	7.877	6.281	6.975	8.659		Down-regulated	Prupe.4G035600	-1.928	-2.164	-3.631	-3.604	-1.043	-2.208
UP-regulated	Prupe.1G542400	3.924	3.209	5.027	3.63	1.7	4.911		Down-regulated	Prupe.4G037800	-2.179	-2.886	-4.074	-2.909	-0.948	-3.374
UP-regulated	Prupe.1G543900	3.063	4.289	4.491	4.581	2.272	2.933		Down-regulated	Prupe.4G041000	-1.967	-2.6	-2.888	-3.176	-4.079	-1.437
UP-regulated	Prupe.1G545600	6.54	6.693	6.125	6.71	6.549	4.628		Down-regulated	Prupe.4G041300	-1.976	-3.374	-3.809	-2.962	-1.646	-3.8
UP-regulated	Prupe.1G548600	4.782	5.686	5.022	4.713	5.4	5.144		Down-regulated	Prupe.4G044600	-1.39	-1.254	-1.364	-0.962	-0.835	-1.067
UP-regulated	Prupe.1G551900	1.291	2.29	3.071	1.993	1.26	2.446		Down-regulated	Prupe.4G045100	-1.751	-1.397	-1.917	-4.29	-5.091	-1.573
UP-regulated	Prupe.1G556200	5.96	5.684	6.608	5.809	3.342	6.516		Down-regulated	Prupe.4G045700	-3.28	-2.503	-6.573	-6.49	-6.325	-5.084
UP-regulated	Prupe.1G556500	4.519	5.218	1.846	6.345	3.046	5.605		Down-regulated	Prupe.4G048800	-2.817	-3.923	-5.33	-5.007	-3.73	-2.884
UP-regulated	Prupe.1G558600	2.145	2.794	2.937	3.929	1.653	3.265		Down-regulated	Prupe.4G054300	-1.985	-1.79	-1.242	-2.041	-2.645	-1.233
UP-regulated	Prupe.1G562300	7.696	5.034	5.278	5.876	4.311	7.255		Down-regulated	Prupe.4G055900	-1.647	-1.734	-2.411	-2.017	-1.055	-1.829
UP-regulated	Prupe.1G573600	4.861	4.124	4.906	4.839	3.901	5.166		Down-regulated	Prupe.4G057700	-2.203	-2.361	-2.04	-1.767	-1.175	-2.375
UP-regulated	Prupe.1G579200	7.252	5.795	7.081	6.45	3.937	7.079		Down-regulated	Prupe.4G060700	-2.528	-2.591	-4.568	-3.341	-1.716	-2.948
UP-regulated	Prupe.2G000500	5.314	5.124	6.48	5.202	2.513	4.357		Down-regulated	Prupe.4G062600	-1.087	-3.019	-3.793	-2.495	-1.489	-1.116
UP-regulated	Prupe.2G000900	10.805	11.294	11.44	12.26	11.208	11.347		Down-regulated	Prupe.4G063000	-3.237	-2.931	-7.049	-3.084	-2.235	-2.7
UP-regulated	Prupe.2G001300	3.319	1.916	2.725	2.023	2.998	2.858		Down-regulated	Prupe.4G066800	-2.364	-2.42	-5.347	-5.258	-5.098	-5.442
UP-regulated	Prupe.2G001800	3.629	3.725	5.655	4.845	3.615	4.216		Down-regulated	Prupe.4G068400	-1.191	-1.288	-1.331	-1.264	-1.034	-1.284
UP-regulated	Prupe.2G001900	9.517	7.59	9.741	10.494	8.489	8.109		Down-regulated	Prupe.4G069300	-1.875	-3.014	-1.464	-4.445	-3.767	-2.641
UP-regulated	Prupe.2G002000	1.53	1.24	2.451	3.147	1.577	2.22		Down-regulated	Prupe.4G069500	-1.907	-2.283	-2.474	-2.169	-0.848	-2.553
UP-regulated	Prupe.2G003400	2.136	2.122	2.37	1.945	1.231	1.807		Down-regulated	Prupe.4G071200	-3.557	-3.769	-2.739	-4.086	-4.514	-3.813
UP-regulated	Prupe.2G005300	6.425	6.412	7.859	6.966	5.709	5.845		Down-regulated	Prupe.4G072200	-2.453	-2.754	-3.766	-3.816	-3.499	-2.271
UP-regulated	Prupe.2G005400	7.583	7.877	10.976	9.341	9.491	10.605		Down-regulated	Prupe.4G073100	-1.28	-1.414	-1.239	-1.454	-1.063	-1.364
UP-regulated	Prupe.2G006200	3.965	4.53	1.513	4.687	4.74	2.88		Down-regulated	Prupe.4G078300	-1.83	-2.134	-4.71	-4.081	-2.941	-2.399
UP-regulated	Prupe.2G006400	6.399	5.829	3.085	6.909	6.347	5.585		Down-regulated	Prupe.4G078400	-2.085	-3.161	-2.575	-3.478	-7.17	-2.856
UP-regulated	Prupe.2G008400	6.52	6.391	6.748	6.537	6.464	6.301		Down-regulated	Prupe.4G085600	-1.283	-1.724	-2.666	-1.896	-0.928	-1.679
UP-regulated	Prupe.2G019500	4.64	3.893	1.925	4.818	2.289	3.627		Down-regulated	Prupe.4G088000	-3.612	-2.793	-4.329	-4.496	-4.638	-1.87
UP-regulated	Prupe.2G021800	4.25	4.93	5.624	5.34	4.402	4.201		Down-regulated	Prupe.4G089000	-4.146	-3.943	-8.893	-7.649	-3.578	-5.914
UP-regulated	Prupe.2G021900	3.822	3.437	4.313	4.148	3.223	4.589		Down-regulated	Prupe.4G091800	-1.439	-1.554	-1.39	-1.485	-1.084	-1.461
UP-regulated	Prupe.2G029500	2.855	2.592	3.071	2.807	2.575	3.242		Down-regulated	Prupe.4G096400	-4.29	-3.956	-5.876	-5.804	-5.917	-3.779
UP-regulated	Prupe.2G029800	3.401	3.172	4.482	4.433	2.08	2.523		Down-regulated	Prupe.4G096600	-1.538	-1.59	-1.948	-1.887	-1.582	-1.874
UP-regulated	Prupe.2G029900	3.407	2.973	4.08	3.931	2.151	2.437		Down-regulated	Prupe.4G096700	-2.962	-3.24	-4.919	-4.101	-3.383	-3.688
UP-regulated	Prupe.2G030600	1.616	2.03	1.205	2.604	1.575	1.997		Down-regulated	Prupe.4G096800	-2.838	-2.603	-3.153	-4.272	-3.635	-3.625
UP-regulated	Prupe.2G031700	2.675	2.591	4.356	3.988	2.374	2.379		Down-regulated	Prupe.4G099600	-2.997	-3.284	-5.294	-4.769	-3.044	-2.576
UP-regulated	Prupe.2G031900	6.336	5.855	9.843	6.782	4.183	6.696		Down-regulated	Prupe.4G103400	-2.495	-2.886	-4.331	-4.369	-2.892	-2.087
UP-regulated	Prupe.2G032000	2.616	3.328	3.732	3.202	1.711	1.997		Down-regulated	Prupe.4G105200	-2.37	-3.171	-4.948	-4.45	-2.839	-2.091
UP-regulated	Prupe.2G033300	5.765	5.367	5.631	5.226	3.474	5.545		Down-regulated	Prupe.4G105400	-1.307	-1.435	-1.954	-1.573	-0.927	-2.338
UP-regulated	Prupe.2G033400	4.965	4.78	5.549	4.765	2.844	5.025		Down-regulated	Prupe.4G107300	-1.507	-1.652	-1.854	-2.019	-1.99	-1.274
UP-regulated	Prupe.2G033700	1.989	1.599	2.667	5.964	3.13	1.797		Down-regulated	Prupe.4G108500	-1.115	-2.319	-2.083	-3.01	-1.845	-1.595
UP-regulated	Prupe.2G037200	1.948	2.699	2.234	2.28	2.546	2.011		Down-regulated	Prupe.4G112500	-1.517	-1.688	-2.167	-1.623	-1.257	-1.575
UP-regulated	Prupe.2G041200	4.605	4.082	2.925	4.705	3.946	3.47		Down-regulated	Prupe.4G118600	-0.915	-1.118	-3.013	-1.869	-3.28	-2.196
UP-regulated	Prupe.2G045500	10.322	10.422	10.975	10.461	9.695	11.096		Down-regulated	Prupe.4G120300	-3.788	-3.356	-4.433	-5.072	-2.916	-3.244
UP-regulated	Prupe.2G046000	3.412	2.146	3.163	2.696	3.936	4.574		Down-regulated	Prupe.4G120400	-2.095	-3.078	-3.077	-3.533	-5.757	-2.436
UP-regulated	Prupe.2G046100	2.768	3.728	5.416	5.092	5.185	6.247		Down-regulated	Prupe.4G121000	-1.975	-2.23	-3.706	-2.995	-2.231	-1.984
UP-regulated	Prupe.2G046400	1.422	1.318	4.624	4.227	3.617	3.992		Down-regulated	Prupe.4G130400	-2.824	-3.597	-4.105	-5	-3.131	-2.054
UP-regulated	Prupe.2G046500	4.134	3.132	8.32	7.392	7.906	8.29		Down-regulated	Prupe.4G130500	-3.902	-3.432	-5.35	-3.565	-4.04	-4.39
UP-regulated	Prupe.2G046700	3.291	2.245	3.267	4.378	7.418	7.771		Down-regulated	Prupe.4G131400	-0.914	-1.008	-2.953	-10.654	-10.493	-4.523
UP-regulated	Prupe.2G046900	2.041	2.286	3.667	3.001	1.342	1.994		Down-regulated	Prupe.4G131900	-2.043	-3.567	-3.824	-4.564	-6.233	-1.109
UP-regulated	Prupe.2G047000	2.676	1.726	5.172	4.878	4.353	4.914		Down-regulated	Prupe.4G134100	-6.983	-8.747	-6.606	-6.323	-4.408	-7.508
UP-regulated	Prupe.2G048700	1.64	1.763	7.741	7.812	6.529	6.374		Down-regulated	Prupe.4G135500	-2.987	-3.032	-2.031	-1.152	-1.129	-2.495
UP-regulated	Prupe.2G059600	1.903	2.696	3.934	2.876	3.098	2.503		Down-regulated	Prupe.4G137100	-4.004	-3.315	-5.797	-4.771	-3.921	-2.131
UP-regulated	Prupe.2G062900	1.952	1.897	1.477	1.694	1.751	1.317		Down-regulated	Prupe.4G138000	-1.391	-1.469	-1.768	-1.56	-1.085	-1.449
UP-regulated	Prupe.2G063400	3.781	3.538	9.252	9.218	9.636	9.094		Down-regulated	Prupe.4G144400	-1.61	-1.995	-3.975	-3.778	-2.974	-1.084
UP-regulated	Prupe.2G066400	3.041	3.212	3.915	4.084	4.334	3.386		Down-regulated	Prupe.4G146600	-2.739	-2.182	-3.509	-2.557	-2.029	-2.746
UP-regulated	Prupe.2G069300	2.245	2.02	2.404	1.967	1.383	2.386		Down-regulated	Prupe.4G148000	-2.422	-1.99	-1.819	-2.039	-2.06	-1.956
UP-regulated	Prupe.2G071800	6.946	6.263	7.822	7.643	7.154	8.44		Down-regulated	Prupe.4G148800	-1.929	-1.816	-2.511	-2.521	-2.904	-1.997
UP-regulated	Prupe.2G086100	5.399	5.126	1.82	5.386	4.257	5.364		Down-regulated	Prupe.4G151600	-4.667	-2.847	-4.775	-4.686	-4.525	-4.87
UP-regulated	Prupe.2G088900	3.115	3.081	1.419	4.604	2.469	3.23		Down-regulated	Prupe.4G153400	-3.943	-3.956	-6.753	-5.766	-3.538	-3.387
UP-regulated	Prupe.2G089000	2.643	2.888	1.611	3.852	1.855	3.017		Down-regulated	Prupe.4G153500	-2.022	-1.761	-1.621	-1.742	-1.431	-1.693
UP-regulated	Prupe.2G091600	1.254	1.959	2.913	2.417	2.945	3.081		Down-regulated	Prupe.4G153600	-3.34	-3.121	-4.164	-4.727	-3.459	-1.86
UP-regulated	Prupe.2G098500	5.563	6.472	4.062	4.4	5.317	5.634		Down-regulated	Prupe.4G155300	-2.814	-3.483	-7.371	-3.824	-1.657	-1.835
UP-regulated	Prupe.2G103300	5.421	5.956	2.149	2.731	3.644	2.771		Down-regulated	Prupe.4G156800	-1.64	-1.534	-1.583	-1.54	-1.419	-1.678
UP-regulated	Prupe.2G103400	5.894	6.29	4.833	4.059	3.817	4.143		Down-regulated	Prupe.4G157800	-2.508	-3.479	-1.243	-1.405	-1.576	-2.46
UP-regulated	Prupe.2G106400	2.614	2.52	2.274	2.258	1.641	4.597		Down-regulated	Prupe.4G162700	-2.123	-1.616	-2.178	-2.025	-2.312	-1.674
UP-regulated	Prupe.2G108200	6.549	6.311	7.502	8.112	7.063	6.123		Down-regulated	Prupe.4G164900	-2.354	-1.725	-1.867	-1.738	-1.906	-1.489
UP-regulated	Prupe.2G108300	8.63	9.234	8.342	9.049	8.516	8.165		Down-regulated	Prupe.4G165000	-3.869	-3.852	-2.512	-6.28	-6.119	-4.613
UP-regulated	Prupe.2G110400	4.003	2.94	4.7	6.853	7.014	5.005		Down-regulated	Prupe.4G165800	-1.799	-0.959	-1.497	-1.379	-2.065	-1.677
UP-regulated	Prupe.2G116300	2.461	4.184	5.011	5.673	2.3	2.3		Down-regulated	Prupe.4G167100	-2.068	-2.516	-4.022	-2.779	-1.561	-2.276
UP-regulated	Prupe.2G120400	5.389	5.118	5.258	5.944	6.449	5.934		Down-regulated	Prupe.4G167400	-1.67	-1.841	-2.566	-2.583	-1.029	-1.847
UP-regulated	Prupe.2G121500	6.038	6.066	1.64	5.81	5.407	5.638		Down-regulated	Prupe.4G170900	-6.612	-0.947	-12.705	-10.758	-12.455	-1.51
UP-regulated	Prupe.2G139600	5.727	4.82	2.994	4.632	5.507	5.651		Down-regulated	Prupe.4G171800	-2.731	-3.578	-1.64	-3.287	-8.271	-3.293
UP-regulated	Prupe.2G140000	1.663	1.725	2.929	2.732	1.749	2.523		Down-regulated	Prupe.4G171900	-1.165	-2.347	-3.814	-2.383	-2.263	-1.115
UP-regulated	Prupe.2G140600	5.829	6.253	5.137	6.607	4.953	6.053		Down-regulated	Prupe.4G173600	-5.238	-5.382	-5.694	-4.906	-4.907	-6.316
UP-regulated	Prupe.2G153100	3.215	2.282	3.803	3.957	2.276	3.07		Down-regulated	Prupe.4G177400	-1.913	-1.545	-1.668	-1.835	-2.229	-1.214
UP-regulated	Prupe.2G153900	2.815	3.91	3.784	6.993	3.084	5.968		Down-regulated	Prupe.4G179300	-2.894	-2.796	-3.738	-8.516	-2.975	-2.146
UP-regulated	Prupe.2G155900	3.883	3.468	3.908	4.561	2.956	3.358		Down-regulated	Prupe.4G180200	-3.024	-3.552	-5.268	-5.695	-4.017	-2.406
UP-regulated	Prupe.2G157300	4.672	4.513	3.179	6.399	4.625	5.504		Down-regulated	Prupe.4G180300	-8.485	-8.512	-8.592	-8.502	-8.342	-8.686
UP-regulated	Prupe.2G164400	2.867	2.413	1.353	1.885	2.263	1.979		Down-regulated	Prupe.4G182500	-2.571	-1.516	-2.038	-1.621	-2.576	-1.826
UP-regulated	Prupe.2G165500	2.019	2.344	1.235	3.289	1.594	2.231		Down-regulated	Prupe.4G184500	-2.632	-2.859	-4.869	-4.241	-1.11	-3.183
UP-regulated	Prupe.2G167500	3.19	3.675	3.302	4.512	4.742	3.359		Down-regulated	Prupe.4G188100	-4.643	-8.438	-6.15	-3.479	-4.201	-2.413
UP-regulated	Prupe.2G171100	11.24	12.079	12.908	12.729	12.291	12.509		Down-regulated	Prupe.4G195900	-1.733	-1.383	-2.34	-1.963	-1.52	-1.399
UP-regulated	Prupe.2G171400	4.069	4.666	4.468	5.262	4.675	4.592		Down-regulated	Prupe.4G200600	-2.986	-6.476	-8.41	-4.463	-8.159	-4.06
UP-regulated	Prupe.2G178500	5.333	4.795	4.308	5.038	2.859	3.692		Down-regulated	Prupe.4G202000	-2.679	-1.888	-3.585	-2.668	-2.342	-2.51
UP-regulated	Prupe.2G180500	3.068	3.198	2.514	1.833	2.587	3.502		Down-regulated	Prupe.4G202600	-1.615	-1.732	-2.493	-1.727	-4.929	-5.641
UP-regulated	Prupe.2G180900	5.235	3.639	3.641	3.746	2.21	4.217		Down-regulated	Prupe.4G205600	-1.688	-1.764	-2.32	-1.958	-1.369	-1.685
UP-regulated	Prupe.2G183700	5.463	6.376	6.72	6.179	4.805	6.288		Down-regulated	Prupe.4G205900	-3.674	-2.14	-2.82	-1.15	-4.466	-2.318
UP-regulated	Prupe.2G183800	4.588	5.296	5.407	5.026	3.969	5.299		Down-regulated	Prupe.4G211900	-1.238	-1.303	-1.809	-1.471	-0.831	-1.208
UP-regulated	Prupe.2G184800	4.115	4.141	1.969	2.394	3.06	2.944		Down-regulated	Prupe.4G218400	-2.04	-0.924	-9.174	-7.227	-8.924	-8.307
UP-regulated	Prupe.2G185700	2.471	2.75	4.404	4.077	1.555	4.055		Down-regulated	Prupe.4G223700	-3.778	-4.29	-5.071	-4.165	-3.013	-3.85
UP-regulated	Prupe.2G186700	2.855	2.865	1.727	3.237	1.767	1.195		Down-regulated	Prupe.4G231600	-2.801	-3.39	-5.135	-5.497	-3.61	-2.151
UP-regulated	Prupe.2G194500	1.708	1.679	1.711	1.47	1.931	2.139		Down-regulated	Prupe.4G232100	-2.867	-2.104	-1.882	-1.613	-0.775	-2.793
UP-regulated	Prupe.2G194600	3.575	3.955	4.822	3.855	4.539	3.781		Down-regulated	Prupe.4G235300	-1.405	-1.063	-2.524	-1.634	-1.473	-1.219
UP-regulated	Prupe.2G205800	2.752	3.312	3.427	3.169	2.791	3.082		Down-regulated	Prupe.4G235900	-4.415	-3.571	-3.652	-3.742	-8.438	-5.338
UP-regulated	Prupe.2G207200	6.527	9.324	8.723	7.712	8.891	7.753		Down-regulated	Prupe.4G237600	-1.361	-2.14	-1.475	-2.027	-1.288	-2.415
UP-regulated	Prupe.2G208300	1.758	1.479	1.505	1.35	1.488	1.91		Down-regulated	Prupe.4G240700	-2.814	-1.81	-3.062	-2.034	-2.047	-3.625
UP-regulated	Prupe.2G209900	1.131	1.971	2.288	1.754	1.398	1.155		Down-regulated	Prupe.4G241000	-3.439	-1.954	-3.336	-3.131	-1.423	-2.551
UP-regulated	Prupe.2G213700	3.009	2.534	2.418	2.067	1.9	3.197		Down-regulated	Prupe.4G241700	-1.459	-2.507	-1.079	-3.056	-0.999	-3.228
UP-regulated	Prupe.2G214700	9.826	8.956	10.953	10.533	8.117	9.598		Down-regulated	Prupe.4G243100	-2.792	-3.372	-5.203	-5.02	-2.997	-2.093
UP-regulated	Prupe.2G223500	10.696	8.913	11.764	10.499	6.952	11.454		Down-regulated	Prupe.4G244400	-3.655	-2.943	-5.141	-4.634	-3.336	-4.552
UP-regulated	Prupe.2G224800	4.635	5.22	4.939	5.3	5.292	5.508		Down-regulated	Prupe.4G245500	-1.052	-0.917	-2.39	-1.769	-0.945	-2.87
UP-regulated	Prupe.2G233500	2.775	2.574	1.028	2.251	2.996	1.766		Down-regulated	Prupe.4G246200	-1.916	-1.956	-2.203	-2.229	-2.176	-1.717
UP-regulated	Prupe.2G238400	2.438	3.093	1.705	2.128	2.517	1.86		Down-regulated	Prupe.4G253700	-1.181	-1.022	-1.521	-1.119	-0.787	-1.306
UP-regulated	Prupe.2G238800	8.93	10.054	11.562	10.981	11.16	11.428		Down-regulated	Prupe.4G256900	-2.679	-3.471	-5.921	-5.632	-3.307	-2.048
UP-regulated	Prupe.2G239500	3.955	3.456	3.107	4.744	3.83	3.808		Down-regulated	Prupe.4G261900	-10.306	-10.334	-10.414	-5.752	-1.534	-3.118
UP-regulated	Prupe.2G239700	4.217	3.734	2.766	3.823	3.541	2.908		Down-regulated	Prupe.4G262300	-2.989	-1.429	-1.477	-1.504	-2.639	-2.174
UP-regulated	Prupe.2G240800	1.698	2.24	2.071	2.103	2.221	1.853		Down-regulated	Prupe.4G262400	-7.322	-3.895	-4.572	-7.34	-7.179	-3.083
UP-regulated	Prupe.2G242500	6.135	4.78	6.12	5.302	2.476	4.971		Down-regulated	Prupe.4G266100	-1.227	-1.173	-1.078	-0.985	-1.044	-1.162
UP-regulated	Prupe.2G244000	12.15	10.869	11.607	11.852	9.673	11.901		Down-regulated	Prupe.4G274700	-1.905	-2.087	-2.326	-2.118	-0.823	-1.107
UP-regulated	Prupe.2G244200	2.739	2.661	1.085	3.263	1.98	2.933		Down-regulated	Prupe.5G002900	-2.199	-2.453	-3.119	-3.09	-2.366	-1.591
UP-regulated	Prupe.2G246800	5.705	4.023	4.81	5.8	6.434	3.561		Down-regulated	Prupe.5G003700	-2.138	-3.204	-4.571	-4.663	-3.107	-1.608
UP-regulated	Prupe.2G247300	2.861	2.866	3.211	3.124	2.8	2.545		Down-regulated	Prupe.5G004600	-1.164	-1.161	-1.294	-1.101	-1.821	-1.126
UP-regulated	Prupe.2G247800	4.148	2.982	4.018	3.87	1.776	3.963		Down-regulated	Prupe.5G008200	-2.667	-2.893	-6.957	-7.103	-8.636	-2.375
UP-regulated	Prupe.2G248900	5.649	5.53	5.505	5.739	5.547	7.274		Down-regulated	Prupe.5G009400	-2.095	-2.329	-4.054	-4.092	-2.183	-1.974
UP-regulated	Prupe.2G250900	5.288	5.143	1.391	1.971	4.656	3.023		Down-regulated	Prupe.5G011100	-2.009	-2.253	-2.628	-2.809	-0.864	-1.469
UP-regulated	Prupe.2G252100	9.138	9.295	6.61	6.927	6.417	8.431		Down-regulated	Prupe.5G013300	-2.329	-3.463	-3.614	-3.215	-2.231	-1.761
UP-regulated	Prupe.2G256100	6.115	6.452	6.628	6.293	6.299	6.596		Down-regulated	Prupe.5G018500	-1.833	-2.937	-7.802	-4.135	-0.823	-2.629
UP-regulated	Prupe.2G257400	9.794	10.221	9.181	9.642	8.254	9.463		Down-regulated	Prupe.5G018800	-2.853	-2.831	-6.412	-6.994	-4.871	-3.549
UP-regulated	Prupe.2G257800	4.25	2.428	2.121	1.359	1.825	1.952		Down-regulated	Prupe.5G021900	-1.143	-2.569	-3.201	-2.71	-2.726	-1.092
UP-regulated	Prupe.2G259900	7.664	7.782	8.122	6.757	6.251	9.849		Down-regulated	Prupe.5G024700	-1.244	-1.129	-1.821	-1.7	-1.011	-1.562
UP-regulated	Prupe.2G260700	5.518	6.322	8.129	7.276	5.857	8.019		Down-regulated	Prupe.5G027700	-2.212	-3.068	-4.403	-5.15	-3.549	-1.592
UP-regulated	Prupe.2G263300	2.59	2.05	1.066	1.79	2.247	1.509		Down-regulated	Prupe.5G032600	-2.189	-2.348	-1.934	-2.791	-1.898	-2.211
UP-regulated	Prupe.2G267600	2.435	3.175	3.51	3.292	2.032	1.883		Down-regulated	Prupe.5G032900	-1.214	-2.037	-2.309	-2.263	-2.594	-1.145
UP-regulated	Prupe.2G271300	6.488	7.193	6.226	7.099	7.175	6.463		Down-regulated	Prupe.5G034100	-1.778	-2.222	-3.587	-3.27	-1.97	-1.374
UP-regulated	Prupe.2G278400	8.412	7.554	7.633	7.202	5.697	8.384		Down-regulated	Prupe.5G034800	-1.669	-4.53	-3.798	-1.958	-2.423	-3.148
UP-regulated	Prupe.2G283900	6.089	5.411	6.042	6.19	5.931	6.194		Down-regulated	Prupe.5G046600	-1.696	-5.932	-4.168	-4.961	-1.429	-5.145
UP-regulated	Prupe.2G286200	2.541	3.732	5.066	5.886	3.738	3.255		Down-regulated	Prupe.5G049100	-2.231	-3.19	-1.707	-3.2	-4.183	-1.657
UP-regulated	Prupe.2G286800	6.647	4.626	7.03	6.831	4.126	5.738		Down-regulated	Prupe.5G052100	-2.527	-2.653	-3.014	-1.83	-1.078	-2.832
UP-regulated	Prupe.2G290400	1.913	2.145	2.499	2.277	1.9	2.563		Down-regulated	Prupe.5G052300	-1.641	-2.401	-3.581	-2.723	-1.103	-1.857
UP-regulated	Prupe.2G299200	4.762	4.289	2.186	3.747	2.717	3.399		Down-regulated	Prupe.5G058200	-1.956	-2.061	-2.523	-2.313	-1.804	-1.215
UP-regulated	Prupe.2G299300	5.197	5.291	4.956	5.251	4.426	4.611		Down-regulated	Prupe.5G058600	-2.961	-3.055	-5.422	-4.254	-3.699	-2.544
UP-regulated	Prupe.2G301600	3.324	3.264	1.052	3.301	3.653	2.916		Down-regulated	Prupe.5G065600	-1.249	-1.328	-1.909	-1.634	-0.93	-1.6
UP-regulated	Prupe.2G301700	2.654	3.367	3.673	4.385	3.046	4.055		Down-regulated	Prupe.5G066600	-3.073	-4.484	-9.751	-6.357	-4.643	-6.085
UP-regulated	Prupe.2G303000	2.86	2.632	1.984	2.572	2.278	2.261		Down-regulated	Prupe.5G069300	-1.274	-2.348	-2.834	-3.071	-4.061	-3.732
PpLEA	Prupe.2G303300	11.931	12.939	7.714	11.861	9.893	12.115		Down-regulated	Prupe.5G072000	-2.105	-1.979	-2.07	-1.471	-1.303	-1.669
UP-regulated	Prupe.2G303900	2.051	2.178	2.447	1.854	2.769	2.097		Down-regulated	Prupe.5G072800	-2.529	-3.401	-3.485	-3.277	-1.899	-1.642
UP-regulated	Prupe.2G304200	1.703	3.22	3.72	3.804	2.68	2.17		Down-regulated	Prupe.5G073100	-3.306	-1.902	-3.724	-5.899	-3.581	-2.171
UP-regulated	Prupe.2G307500	3.859	3.158	3.507	3.492	3.092	3.215		Down-regulated	Prupe.5G073200	-1.845	-1.873	-3.691	-3.285	-0.841	-1.689
UP-regulated	Prupe.2G309000	1.41	1.301	1.795	1.982	1.658	1.819		Down-regulated	Prupe.5G074400	-2.659	-2.601	-4.233	-3.37	-1.477	-3.074
UP-regulated	Prupe.2G311800	1.678	1.394	2.208	1.708	1.491	2.118		Down-regulated	Prupe.5G075300	-1.15	-3.766	-3.413	-5.327	-1.166	-1.656
UP-regulated	Prupe.2G316500	1.683	2.161	2.435	1.556	1.64	2.357		Down-regulated	Prupe.5G075700	-2.227	-2.263	-2.848	-2.68	-1.796	-1.762
UP-regulated	Prupe.2G316800	1.748	3.046	3.432	1.991	2.531	2.266		Down-regulated	Prupe.5G083700	-2.087	-2.547	-2.2	-2.275	-2.188	-1.07
UP-regulated	Prupe.2G321100	4.171	4.995	5.718	5.158	3.775	4.609		Down-regulated	Prupe.5G084700	-2.572	-2.993	-3.38	-1.677	-1.949	-2.727
UP-regulated	Prupe.2G323500	6.627	7.138	10.079	8.735	7.201	9.705		Down-regulated	Prupe.5G086500	-1.566	-2.086	-4.85	-4.537	-3.72	-2.245
UP-regulated	Prupe.2G325200	11.675	10.885	12.366	11.697	10.484	10.766		Down-regulated	Prupe.5G088400	-1.127	-1.616	-2.122	-1.847	-1.138	-1.446
UP-regulated	Prupe.2G327600	2.282	2.702	4.524	3.805	3.225	2.669		Down-regulated	Prupe.5G089500	-1.308	-1.288	-1.343	-1.24	-0.973	-1.126
UP-regulated	Prupe.3G001400	3.097	3.011	3.576	4.756	2.132	3.776		Down-regulated	Prupe.5G092000	-5.463	-8.919	-8.999	-5.732	-1.414	-5.644
UP-regulated	Prupe.3G007600	5.012	4.415	3.672	3.838	3.632	3.928		Down-regulated	Prupe.5G094300	-6.917	-6.944	-5.167	-1.682	-4.322	-7.119
UP-regulated	Prupe.3G012200	2.095	2.614	2.7	1.841	2.142	2.733		Down-regulated	Prupe.5G096100	-2.23	-2.278	-3.098	-5.386	-3.289	-1.288
UP-regulated	Prupe.3G012400	3.41	3.568	4.123	2.172	1.898	2.127		Down-regulated	Prupe.5G096300	-1.936	-2.385	-2.829	-1.947	-1.769	-1.728
UP-regulated	Prupe.3G012600	4.095	3.913	5.154	2.754	5.312	5.574		Down-regulated	Prupe.5G099100	-5.076	-6.113	-8.098	-6.322	-2.411	-5.946
UP-regulated	Prupe.3G012700	11.443	10.09	13.273	12.159	12.035	13.109		Down-regulated	Prupe.5G101300	-1.479	-1.171	-1.651	-1.295	-1.268	-1.605
UP-regulated	Prupe.3G012800	8.179	7.352	10.431	7.654	10.23	10.908		Down-regulated	Prupe.5G104700	-1.231	-1.426	-2.338	-1.395	-1.063	-1.237
UP-regulated	Prupe.3G012900	1.263	1.917	1.982	1.771	2.891	2.248		Down-regulated	Prupe.5G113600	-1.17	-2.034	-1.979	-1.311	-1.881	-1.632
UP-regulated	Prupe.3G016000	1.339	1.785	1.858	1.895	2.011	1.379		Down-regulated	Prupe.5G115800	-2.061	-3.126	-4.112	-4.529	-3.088	-1.607
UP-regulated	Prupe.3G016100	1.703	2.252	2.638	2.837	1.533	1.716		Down-regulated	Prupe.5G117700	-1.127	-1.372	-2.07	-1.429	-0.922	-1.502
UP-regulated	Prupe.3G026800	10.024	10.005	4.367	7.197	9.619	7.459		Down-regulated	Prupe.5G118000	-2.259	-3.501	-6.321	-4.764	-2.403	-2.313
UP-regulated	Prupe.3G027700	7.029	7.029	7.47	7.953	7.902	7.849		Down-regulated	Prupe.5G122000	-1.735	-0.98	-2.088	-2.084	-2.028	-2.464
UP-regulated	Prupe.3G029000	1.595	1.645	2.448	2.136	2.312	2.178		Down-regulated	Prupe.5G124500	-1.757	-2.481	-3.429	-3.32	-2.414	-1.703
UP-regulated	Prupe.3G031700	8.107	7.459	4.151	5.991	4.401	5.255		Down-regulated	Prupe.5G128300	-2.25	-2.534	-2.91	-3.012	-1.896	-1.78
UP-regulated	Prupe.3G037200	4.218	4.091	4.896	5.469	4.706	5.264		Down-regulated	Prupe.5G131200	-2.032	-1.868	-2.647	-2.557	-1.691	-1.064
UP-regulated	Prupe.3G038500	3.748	2.04	2.761	2.105	2.11	3.233		Down-regulated	Prupe.5G140800	-3.74	-3.372	-5.347	-5.812	-3.015	-3.104
UP-regulated	Prupe.3G038900	2.323	2.586	2.337	2.111	2.578	1.742		Down-regulated	Prupe.5G140900	-1.752	-1.922	-3.868	-2.714	-1.724	-2.045
UP-regulated	Prupe.3G039300	3.099	2.982	1.521	2.025	1.639	2.483		Down-regulated	Prupe.5G142300	-2.91	-2.56	-3.026	-4.666	-2.56	-3.102
UP-regulated	Prupe.3G039500	1.459	1.835	1.368	1.704	1.609	2.138		Down-regulated	Prupe.5G143500	-2.796	-4.726	-7.483	-4.956	-0.943	-3.033
UP-regulated	Prupe.3G041500	3.107	3.813	4.132	3.108	2.721	4.527		Down-regulated	Prupe.5G146900	-7.126	-3.304	-9.675	-9.585	-9.424	-2.887
UP-regulated	Prupe.3G041600	7.885	7.997	8.93	7.604	6.55	9.099		Down-regulated	Prupe.5G149800	-1.695	-2.127	-1.82	-2.277	-1.284	-1.113
UP-regulated	Prupe.3G053400	1.316	1.826	1.241	3.84	2.889	2.028		Down-regulated	Prupe.5G150900	-2.146	-1.72	-1.869	-2.061	-2.551	-1.934
UP-regulated	Prupe.3G053500	7.878	7.394	8.526	8.118	3.69	8.955		Down-regulated	Prupe.5G160500	-3.067	-3.306	-4.856	-3.713	-1.597	-2.6
UP-regulated	Prupe.3G060100	5.458	5.995	4.667	4.714	3.455	4.213		Down-regulated	Prupe.5G161300	-2.615	-4.271	-6.065	-4.887	-5.14	-1.796
UP-regulated	Prupe.3G060200	2.75	2.259	2.705	2.645	1.918	2.265		Down-regulated	Prupe.5G162400	-7.212	-7.239	-4.456	-7.23	-5.212	-7.414
UP-regulated	Prupe.3G060500	2.245	2.191	3.035	4.019	3.316	2.456		Down-regulated	Prupe.5G165300	-2.941	-2.432	-4.201	-3.432	-2.634	-1.88
UP-regulated	Prupe.3G060600	8.028	9.535	7.924	6.588	6.479	11.285		Down-regulated	Prupe.5G166000	-2.869	-2.505	-1.725	-3.498	-1.481	-2.581
UP-regulated	Prupe.3G061800	4.339	4.904	4.133	7.26	3.418	4.378		Down-regulated	Prupe.5G169500	-1.616	-2.336	-3.082	-2.789	-5.253	-1.146
UP-regulated	Prupe.3G063500	9.272	7.677	9.173	8.351	5.018	9.178		Down-regulated	Prupe.5G169600	-2.116	-2.152	-2.595	-2.228	-1.755	-1.529
UP-regulated	Prupe.3G064200	4.138	3.204	4.3	4.078	2.264	4.182		Down-regulated	Prupe.5G169700	-1.117	-2.294	-3.987	-2.956	-2.211	-1.455
UP-regulated	Prupe.3G068200	1.132	1.105	2.669	1.933	1.767	1.419		Down-regulated	Prupe.5G170300	-1.537	-1.164	-1.069	-1.183	-0.949	-1.298
UP-regulated	Prupe.3G069700	3.553	4.235	5.604	5.231	4.214	4.68		Down-regulated	Prupe.5G171500	-2.023	-2.774	-5.966	-5.982	-4.479	-1.066
UP-regulated	Prupe.3G072000	5.343	6.026	7.621	6.865	4.145	5.604		Down-regulated	Prupe.5G171900	-1.364	-2.418	-1.847	-3.267	-2.143	-1.806
UP-regulated	Prupe.3G075600	5.603	6.769	6.818	5.738	3.895	5.685		Down-regulated	Prupe.5G176000	-1.45	-1.813	-3.072	-2.564	-2.082	-1.643
UP-regulated	Prupe.3G075700	4.993	5.957	3.355	5.817	1.977	1.726		Down-regulated	Prupe.5G177700	-1.549	-1.699	-2.364	-1.916	-1.406	-1.353
UP-regulated	Prupe.3G076000	2.802	2.976	4.361	3.729	2.433	2.956		Down-regulated	Prupe.5G178800	-1.387	-1.349	-1.14	-1.339	-1.013	-2.077
UP-regulated	Prupe.3G077600	2.275	2.032	1.104	1.406	1.967	1.284		Down-regulated	Prupe.5G181600	-5.2	-4.204	-4.707	-3.417	-6.046	-4.801
UP-regulated	Prupe.3G084900	5.176	5.735	4.687	6.664	4.724	6.596		Down-regulated	Prupe.5G188200	-2.572	-3.265	-4.058	-4.363	-2.136	-1.858
UP-regulated	Prupe.3G085500	7.951	8.404	9.877	9.624	7.609	9.218		Down-regulated	Prupe.5G192000	-1.324	-1.288	-1.252	-1.401	-1.201	-1.105
UP-regulated	Prupe.3G085800	3.99	4.377	3.828	4.766	3.92	4.463		Down-regulated	Prupe.5G194500	-4.461	-6.948	-8.248	-6.573	-1.307	-5.84
UP-regulated	Prupe.3G086000	2.373	1.749	1.152	1.404	1.263	1.495		Down-regulated	Prupe.5G195200	-1.599	-2.727	-5.898	-5.429	-3.706	-2.572
UP-regulated	Prupe.3G087000	6.917	6.085	3.828	5.357	5.295	5.411		Down-regulated	Prupe.5G196900	-1.638	-1.555	-1.597	-1.702	-1.607	-1.324
UP-regulated	Prupe.3G092000	2.326	1.221	1.75	1.826	1.485	1.593		Down-regulated	Prupe.5G199700	-3.977	-3.373	-4.715	-5.566	-5.847	-4.034
UP-regulated	Prupe.3G095200	1.757	1.365	1.312	1.46	1.343	1.403		Down-regulated	Prupe.5G200200	-4.502	-3.692	-5.074	-5.448	-7.011	-2.538
UP-regulated	Prupe.3G102900	7.054	7.222	8.8	8.98	5.802	7.975		Down-regulated	Prupe.5G204200	-2.698	-3.654	-4.752	-3.091	-6.369	-6.714
UP-regulated	Prupe.3G103200	6.719	4.9	5.1	5.224	3.916	7.084		Down-regulated	Prupe.5G205700	-2.388	-3.571	-5.475	-5.289	-3.624	-1.783
UP-regulated	Prupe.3G103900	7.419	7.507	7.275	6.417	5.412	8.722		Down-regulated	Prupe.5G207500	-8.007	-9.554	-7.05	-4.367	-9.383	-6.269
UP-regulated	Prupe.3G108500	5.019	5.9	6.747	6.293	4.876	6.07		Down-regulated	Prupe.5G208000	-1.349	-1.376	-1.38	-2.167	-2.681	-2.759
UP-regulated	Prupe.3G110400	9.738	9.518	9.771	10.103	9.858	9.454		Down-regulated	Prupe.5G208200	-1.292	-1.487	-1.961	-1.398	-0.778	-1.503
UP-regulated	Prupe.3G110500	8.33	8.961	11.149	10.531	10.373	10.859		Down-regulated	Prupe.5G211000	-2.285	-2.385	-4.667	-3.133	-2.932	-1.463
UP-regulated	Prupe.3G115800	2.196	1.954	2.292	1.84	1.448	1.902		Down-regulated	Prupe.5G212900	-4.76	-2.306	-4.867	-4.777	-2.742	-4.961
UP-regulated	Prupe.3G120900	6.065	6.5	6.886	6.643	6.629	3.763		Down-regulated	Prupe.5G214600	-1.82	-2.416	-2.812	-3.437	-3.047	-1.493
UP-regulated	Prupe.3G121800	3.751	3.468	3.827	3.315	3.65	3.292		Down-regulated	Prupe.5G215400	-1.641	-1.639	-1.905	-1.971	-1.228	-2.559
UP-regulated	Prupe.3G125200	2.539	2.961	2.478	3.34	4.057	1.471		Down-regulated	Prupe.5G219100	-4.32	-3.77	-3.775	-3.457	-1.111	-5.244
UP-regulated	Prupe.3G126500	9.002	7.855	6.126	6.418	6.732	7.266		Down-regulated	Prupe.5G220900	-3.909	-2.446	-2.57	-1.822	-4.253	-2.833
UP-regulated	Prupe.3G127100	2.795	3.292	2.337	3.776	2.822	2.417		Down-regulated	Prupe.5G221200	-1.743	-2.234	-3.936	-1.724	-2.272	-3.619
UP-regulated	Prupe.3G129600	8.439	8.496	10.987	11.306	8.592	8.212		Down-regulated	Prupe.5G223400	-2.721	-2.721	-2.673	-1.702	-1.654	-3.132
UP-regulated	Prupe.3G131100	7.359	7.687	6.033	5.994	4.78	6.672		Down-regulated	Prupe.5G224200	-1.728	-1.754	-3.553	-2.58	-2.19	-1.447
UP-regulated	Prupe.3G131700	5.356	5.192	8.041	6.351	1.993	6.39		Down-regulated	Prupe.5G226200	-1.796	-3.172	-4.909	-4.55	-0.964	-4.716
UP-regulated	Prupe.3G131900	2.268	2.657	2.111	2.848	2.138	2.542		Down-regulated	Prupe.5G229600	-3.605	-2.104	-2.758	-3.554	-2.401	-2.118
UP-regulated	Prupe.3G133100	5.726	6.385	5.149	6.423	5.131	6.162		Down-regulated	Prupe.5G230300	-3.712	-2.759	-5.52	-4.043	-4.561	-2.09
UP-regulated	Prupe.3G135700	2.837	3.742	4.928	3.334	1.73	3.442		Down-regulated	Prupe.5G230400	-2.138	-3.167	-4.415	-3.732	-3.431	-2.916
UP-regulated	Prupe.3G137700	7.827	8.204	7.291	7.821	6.789	7.489		Down-regulated	Prupe.6G005200	-1.164	-1.414	-1.221	-1.172	-1.04	-1.121
UP-regulated	Prupe.3G145300	5.907	5.955	6.958	5.764	3.403	4.834		Down-regulated	Prupe.6G006800	-2.559	-4.389	-4.483	-5.388	-5.221	-1.929
UP-regulated	Prupe.3G153100	12.545	13.119	13.407	12.195	8.209	12.782		Down-regulated	Prupe.6G007500	-3.837	-3.252	-6.032	-6.35	-7.447	-1.653
UP-regulated	Prupe.3G153300	9.469	9.571	10.114	9.13	4.983	9.655		Down-regulated	Prupe.6G010800	-2.22	-1.355	-1.72	-1.736	-1.824	-1.546
UP-regulated	Prupe.3G156700	1.217	1.53	1.413	1.655	2.162	1.475		Down-regulated	Prupe.6G011600	-2.559	-3.296	-5.419	-5.368	-3.169	-1.995
UP-regulated	Prupe.3G157200	3.77	5.186	5.759	5.124	4.467	5.613		Down-regulated	Prupe.6G015500	-2.719	-1.575	-3.349	-1.715	-2.98	-2.312
UP-regulated	Prupe.3G158900	4.769	2.167	3.478	3.754	2.502	3.182		Down-regulated	Prupe.6G015600	-1.958	-1.079	-3.478	-2.008	-2.023	-2.205
UP-regulated	Prupe.3G164200	4.361	4.866	2.993	6.276	4.267	5.14		Down-regulated	Prupe.6G016200	-1.79	-2.436	-2.552	-2.489	-2.041	-1.261
UP-regulated	Prupe.3G164900	2.575	2.766	3.286	3.221	3.158	2.113		Down-regulated	Prupe.6G020400	-3.274	-3.156	-4.333	-2.64	-1.47	-3.487
UP-regulated	Prupe.3G165900	3.496	3.613	2.819	2.888	3.197	2.575		Down-regulated	Prupe.6G021100	-1.854	-3.07	-5.511	-4.597	-2.785	-1.719
UP-regulated	Prupe.3G168100	8.772	9.203	10.073	9.006	8.243	9.03		Down-regulated	Prupe.6G021200	-2.607	-3.137	-5.057	-4.605	-3.084	-1.865
UP-regulated	Prupe.3G169800	6.074	6.591	4.859	5.847	5.264	6.061		Down-regulated	Prupe.6G021300	-2.18	-3.232	-4.024	-5.309	-3.371	-2.127
UP-regulated	Prupe.3G170300	4.213	4.872	3.407	3.681	3.016	5.144		Down-regulated	Prupe.6G021400	-1.547	-1.385	-2.016	-1.638	-1.466	-1.143
UP-regulated	Prupe.3G171200	3.799	4.019	3.553	2.963	4.271	3.06		Down-regulated	Prupe.6G021700	-1.837	-2.368	-3.538	-2.523	-2.367	-1.612
UP-regulated	Prupe.3G176200	13.327	11.463	13.502	12.154	7.782	13.731		Down-regulated	Prupe.6G022100	-2.601	-3.424	-5.924	-4.831	-3.957	-2.223
UP-regulated	Prupe.3G177400	10.798	10.191	11.694	10.789	10.283	10.065		Down-regulated	Prupe.6G024000	-2.625	-2.855	-1.841	-3.767	-2.541	-1.73
UP-regulated	Prupe.3G178200	1.957	2.71	2.74	2.582	1.746	2.432		Down-regulated	Prupe.6G026100	-1.407	-1.605	-2.247	-2.178	-2.005	-2.346
UP-regulated	Prupe.3G181200	9.458	10.846	10.298	9.116	9.895	11.883		Down-regulated	Prupe.6G033100	-1.352	-2.563	-4.211	-4.003	-2.194	-1.341
UP-regulated	Prupe.3G181700	1.724	2.543	2.203	1.777	1.901	1.834		Down-regulated	Prupe.6G037700	-2.25	-1.381	-2.018	-3.019	-3.395	-2.499
UP-regulated	Prupe.3G182700	3.319	3.973	4.498	4.688	3.066	2.781		Down-regulated	Prupe.6G039400	-1.916	-1.664	-2.069	-2.017	-2.692	-1.555
UP-regulated	Prupe.3G184200	10.123	11.032	10.531	7.997	8.121	11.492		Down-regulated	Prupe.6G041300	-4.25	-4.269	-5.944	-2.589	-5.101	-5.466
UP-regulated	Prupe.3G185800	2.384	2.11	1.919	2.259	1.298	1.578		Down-regulated	Prupe.6G044500	-6.433	-7.618	-10.162	-7.116	-2.375	-7.434
UP-regulated	Prupe.3G188500	1.29	2.331	2.208	2.903	2.849	1.701		Down-regulated	Prupe.6G047300	-1.619	-1.082	-5.786	-3.283	-3.208	-3.063
UP-regulated	Prupe.3G188800	1.516	3.086	3.026	2.788	1.951	2.001		Down-regulated	Prupe.6G050500	-2.409	-1.649	-3.275	-2.952	-1.265	-2.112
UP-regulated	Prupe.3G189300	2.457	2.056	3.122	3.202	1.974	2.569		Down-regulated	Prupe.6G054300	-1.719	-1.734	-2.348	-1.998	-1.493	-1.645
UP-regulated	Prupe.3G196400	4.195	3.117	2.984	2.781	1.54	2.713		Down-regulated	Prupe.6G055400	-1.686	-1.476	-1.864	-1.727	-1.312	-1.886
UP-regulated	Prupe.3G197600	7.113	8.06	8.674	7.919	7.185	8.99		Down-regulated	Prupe.6G055900	-0.95	-2.428	-4.205	-3.18	-2.298	-1.619
UP-regulated	Prupe.3G198500	5.825	6.071	5.664	6.648	5.598	6.092		Down-regulated	Prupe.6G057800	-6.776	-10.656	-6.909	-4.662	-2.953	-6.166
UP-regulated	Prupe.3G201300	9.959	10.413	10.189	10.185	8.772	10.45		Down-regulated	Prupe.6G059400	-1.372	-1.409	-1.443	-1.412	-1.392	-1.434
UP-regulated	Prupe.3G202300	2.155	1.926	1.461	2.582	1.681	1.566		Down-regulated	Prupe.6G059500	-2.045	-2.263	-3.39	-3.14	-2.711	-1.887
UP-regulated	Prupe.3G204400	4.004	4.291	4.653	3.911	2.897	5.206		Down-regulated	Prupe.6G061900	-1.124	-0.954	-1.929	-1.581	-1.166	-1.362
UP-regulated	Prupe.3G204800	2.296	3.69	4.69	3.533	2.609	3.136		Down-regulated	Prupe.6G063200	-1.054	-1.298	-1.732	-1.717	-1.321	-1.383
UP-regulated	Prupe.3G204900	13.588	14.296	15.389	14.814	13.252	13.89		Down-regulated	Prupe.6G063300	-1.386	-1.725	-2.511	-2.022	-1.4	-1.476
UP-regulated	Prupe.3G207000	4.009	4.635	5.066	5.138	4.833	3.598		Down-regulated	Prupe.6G066900	-5.479	-3.417	-6.375	-4.435	-1.622	-2.738
UP-regulated	Prupe.3G207800	2.411	1.742	3.104	2.705	2.328	3.162		Down-regulated	Prupe.6G067700	-1.955	-3.196	-2.461	-4.179	-5.018	-5.374
UP-regulated	Prupe.3G208700	4.79	5.284	5.945	6.429	5.098	4.776		Down-regulated	Prupe.6G072000	-6.888	-5.112	-7.995	-6.448	-4.294	-7.724
UP-regulated	Prupe.3G213800	3.479	3.792	2.729	2.068	1.975	2.329		Down-regulated	Prupe.6G078400	-2.893	-3.631	-9.207	-6.259	-1.676	-2.608
UP-regulated	Prupe.3G217300	1.574	1.627	1.365	1.641	1.968	1.163		Down-regulated	Prupe.6G085200	-2.007	-1.718	-1.826	-1.912	-0.847	-1.928
UP-regulated	Prupe.3G217600	7.606	6.787	5.662	5.463	5.979	5.32		Down-regulated	Prupe.6G088500	-1.14	-1.419	-1.737	-1.265	-1.107	-1.146
UP-regulated	Prupe.3G219600	6.222	6.793	8.128	8.132	6.741	6.698		Down-regulated	Prupe.6G090000	-3.555	-3.507	-6.046	-2.54	-1.77	-2.285
UP-regulated	Prupe.3G219700	6.51	6.506	6.483	7.074	5.379	6.092		Down-regulated	Prupe.6G092200	-1.473	-1.351	-1.551	-1.754	-2.265	-1.309
UP-regulated	Prupe.3G221600	6.511	7.15	5.748	5.947	5.855	6.596		Down-regulated	Prupe.6G101100	-2.935	-3.942	-4.631	-3.513	-1.396	-3.168
UP-regulated	Prupe.3G224000	2.457	2.995	2.732	2.284	3.658	3.703		Down-regulated	Prupe.6G103800	-3.052	-3.129	-3.93	-3.007	-0.949	-2.908
UP-regulated	Prupe.3G226900	3.606	2.936	3.68	3.402	1.861	2.963		Down-regulated	Prupe.6G104700	-3.15	-4.411	-4.237	-5.785	-7.206	-2.712
UP-regulated	Prupe.3G227300	1.662	1.759	2.181	1.494	1.698	1.704		Down-regulated	Prupe.6G113500	-2.229	-2.441	-2.547	-2.645	-2.048	-1.617
UP-regulated	Prupe.3G227700	9.113	8.365	7.449	8.057	8.66	7.701		Down-regulated	Prupe.6G117300	-2.283	-3.872	-5.535	-3.136	-0.959	-1.939
UP-regulated	Prupe.3G232500	4.602	4.148	4.443	3.896	2.668	6.001		Down-regulated	Prupe.6G120200	-4.539	-2.956	-5.036	-5.088	-4.988	-2.768
UP-regulated	Prupe.3G234200	4.33	5.023	4.401	3.195	4.237	4.066		Down-regulated	Prupe.6G120300	-5.289	-4.357	-11.275	-10.184	-8.674	-3.032
UP-regulated	Prupe.3G235900	5.985	6.293	2.634	6.659	5.653	6.28		Down-regulated	Prupe.6G122900	-2.724	-1.961	-2.737	-2.413	-2.626	-1.822
UP-regulated	Prupe.3G236900	5.659	4.642	6.01	4.718	6.548	6.441		Down-regulated	Prupe.6G126800	-3.881	-3.818	-3.317	-2.72	-4.677	-2.905
UP-regulated	Prupe.3G237000	5.738	4.219	7.322	5.723	3.457	7.561		Down-regulated	Prupe.6G127500	-2.043	-1.998	-2.125	-1.78	-1.813	-1.656
UP-regulated	Prupe.3G237300	7.704	6.665	9.378	7.72	5.706	9.509		Down-regulated	Prupe.6G135600	-1.822	-1.344	-3.29	-3.324	-1.94	-1.244
UP-regulated	Prupe.3G237800	7.672	6.771	10.028	9.436	4.171	7.103		Down-regulated	Prupe.6G141000	-2.638	-2.681	-7.612	-5.672	-1.336	-4.257
UP-regulated	Prupe.3G239200	1.563	1.298	1.41	1.78	1.281	1.525		Down-regulated	Prupe.6G147800	-2.692	-1.657	-10.156	-6.4	-3.522	-2.748
UP-regulated	Prupe.3G242600	2.936	1.511	3.314	2.435	1.524	2.075		Down-regulated	Prupe.6G149000	-1.785	-2.52	-2.438	-2.833	-2.712	-1.249
UP-regulated	Prupe.3G243900	2.174	2.317	2.079	2.021	2.896	1.543		Down-regulated	Prupe.6G150800	-3.372	-3.212	-4.57	-3.293	-3.026	-3.198
UP-regulated	Prupe.3G245400	4.363	2.596	5.178	3.592	2.205	4.244		Down-regulated	Prupe.6G151300	-7.346	-2.268	-3.69	-2.87	-3.295	-3.965
UP-regulated	Prupe.3G246400	1.307	2.02	3.345	1.738	2.318	3.184		Down-regulated	Prupe.6G156300	-1.849	-1.581	-2.419	-2.499	-1.619	-1.916
UP-regulated	Prupe.3G246900	3.846	3.074	4.234	4.259	5.123	3.538		Down-regulated	Prupe.6G159500	-3.727	-3.705	-1.096	-1.889	-1.058	-3.29
UP-regulated	Prupe.3G248600	4.408	4.251	3.777	2.392	1.896	6.517		Down-regulated	Prupe.6G159900	-1.718	-1.754	-2.11	-2.08	-1.662	-1.467
UP-regulated	Prupe.3G248700	13.401	12.418	11.202	11.929	9.443	13.727		Down-regulated	Prupe.6G167000	-3.096	-3.15	-2.333	-2.264	-3.977	-1.401
UP-regulated	Prupe.3G250000	7.342	7.768	10.279	9.214	7.395	9.047		Down-regulated	Prupe.6G167500	-2.232	-2.511	-2.114	-1.988	-1.889	-1.926
UP-regulated	Prupe.3G251100	1.833	1.931	2.734	2.828	2.08	2.164		Down-regulated	Prupe.6G168000	-1.066	-1.16	-1.306	-1.097	-0.783	-1.216
UP-regulated	Prupe.3G251500	11.224	11.749	12.702	11.734	7.668	12.98		Down-regulated	Prupe.6G176600	-1.015	-2.505	-2.861	-3.093	-2.261	-1.688
UP-regulated	Prupe.3G251600	7.937	7.585	9.245	8.519	5.954	8.569		Down-regulated	Prupe.6G177100	-1.767	-1.686	-1.304	-0.987	-0.839	-1.336
UP-regulated	Prupe.3G251700	10.228	10.218	10.51	11.669	8.566	10.814		Down-regulated	Prupe.6G181100	-2.071	-6.746	-4.977	-6.737	-6.576	-1.735
UP-regulated	Prupe.3G251800	6.694	7.233	7.723	8.391	8.025	7.109		Down-regulated	Prupe.6G182000	-1.714	-1.975	-2.268	-1.96	-1.336	-1.746
UP-regulated	Prupe.3G251900	6.237	6.083	6.61	7.794	7.769	6.625		Down-regulated	Prupe.6G191800	-2.21	-2.359	-1.595	-1.617	-1.605	-1.607
UP-regulated	Prupe.3G253400	1.833	1.558	1.901	2.617	3.043	1.168		Down-regulated	Prupe.6G198300	-2.09	-2.433	-4.689	-4.177	-6.021	-1.433
UP-regulated	Prupe.3G253500	4.173	4.266	3.364	3.189	3.912	2.87		Down-regulated	Prupe.6G198600	-2.836	-1.593	-3.95	-3.86	-3.24	-2.136
UP-regulated	Prupe.3G253600	3.359	3.677	4.601	4.097	4.14	2.729		Down-regulated	Prupe.6G200200	-2.882	-1.619	-5.672	-2.734	-3.58	-2.746
UP-regulated	Prupe.3G255000	7.87	7.721	7.65	8.029	7.369	8.943		Down-regulated	Prupe.6G201700	-2.414	-2.804	-4.575	-3.956	-3.013	-1.767
UP-regulated	Prupe.3G255800	5.753	10.011	7.054	6.55	6.704	7.397		Down-regulated	Prupe.6G202900	-1.172	-1.436	-10.717	-4.192	-0.853	-2.13
UP-regulated	Prupe.3G256300	2.878	2.465	2.835	4.526	2.009	2.183		Down-regulated	Prupe.6G203600	-1.24	-2.317	-8.604	-6.76	-2.378	-1.601
UP-regulated	Prupe.3G258400	2.234	1.956	2.695	2.602	1.529	2.456		Down-regulated	Prupe.6G205100	-1.829	-1.561	-2.042	-2.197	-2.249	-1.39
UP-regulated	Prupe.3G259100	8.341	8.904	11.626	9.889	6.19	10.04		Down-regulated	Prupe.6G205400	-0.98	-1.591	-5.988	-3.896	-1.243	-3.962
UP-regulated	Prupe.3G259700	6.574	4.502	5.611	5.893	5.62	5.988		Down-regulated	Prupe.6G205700	-3.132	-1.996	-1.53	-6.129	-9.182	-5.169
UP-regulated	Prupe.3G266000	3.275	3.29	2.376	4.887	2.841	3.636		Down-regulated	Prupe.6G207000	-3.204	-1.555	-3.426	-8.099	-7.938	-6.427
UP-regulated	Prupe.3G269400	3.349	1.99	2.631	2.953	1.962	3.184		Down-regulated	Prupe.6G207500	-1.426	-1.11	-4.776	-2.233	-2.95	-6.728
UP-regulated	Prupe.3G270200	2.813	2.834	2.538	3.021	2.927	2.241		Down-regulated	Prupe.6G213200	-1.832	-2.503	-1.511	-2.182	-2.099	-1.911
UP-regulated	Prupe.3G272500	2.966	3.291	3.601	3.378	3.254	2.895		Down-regulated	Prupe.6G214400	-7.95	-7.635	-8.312	-11.58	-8.907	-7.634
UP-regulated	Prupe.3G274100	4.598	4.956	3.639	6.504	3.217	4.685		Down-regulated	Prupe.6G221900	-1.396	-2.391	-1.69	-2.115	-2.706	-1.368
UP-regulated	Prupe.3G275400	2.012	1.391	2.674	2.476	1.647	2.35		Down-regulated	Prupe.6G222600	-3.219	-2.069	-2.452	-3.397	-2.861	-2.396
UP-regulated	Prupe.3G279800	4.057	4.323	3.716	3.723	3.003	3.177		Down-regulated	Prupe.6G224300	-1.542	-1.665	-2.43	-2.097	-1.18	-1.985
UP-regulated	Prupe.3G280800	3.296	3.709	4.699	3.832	2.156	3.951		Down-regulated	Prupe.6G226000	-3.057	-3.519	-3.124	-2.957	-8.905	-1.423
UP-regulated	Prupe.3G281400	3.586	3.281	4.617	5.09	2.894	3.67		Down-regulated	Prupe.6G226100	-1.807	-4.718	-6.351	-4.563	-6.492	-3.608
UP-regulated	Prupe.3G284200	1.508	1.735	1.73	1.946	2.092	1.305		Down-regulated	Prupe.6G229300	-2.999	-3.576	-4.862	-5.153	-2.89	-2.072
UP-regulated	Prupe.3G284700	7.659	6.307	5.884	7.386	6.143	7.772		Down-regulated	Prupe.6G230400	-1.499	-1.528	-1.885	-1.48	-1.106	-1.588
UP-regulated	Prupe.3G284800	6.312	6.798	6.467	6.745	6.874	6.955		Down-regulated	Prupe.6G231600	-1.327	-1.031	-1.224	-1.283	-1.129	-1.263
UP-regulated	Prupe.3G288700	2.607	2.524	2.354	2.075	1.33	2.622		Down-regulated	Prupe.6G233200	-3.028	-2.155	-6.817	-3.835	-1.923	-1.341
UP-regulated	Prupe.3G289600	8.353	8.359	7.78	8.323	7.294	8.647		Down-regulated	Prupe.6G233300	-2.624	-2.305	-9.909	-3.709	-1.829	-1.596
UP-regulated	Prupe.3G291300	2.004	2.779	3.336	2.381	1.572	2.387		Down-regulated	Prupe.6G235100	-1.418	-1.346	-1.633	-1.478	-0.961	-1.267
UP-regulated	Prupe.3G291400	1.117	1.446	2.616	1.551	1.831	1.518		Down-regulated	Prupe.6G236100	-1.838	-1.332	-3.772	-1.437	-2.836	-2.089
UP-regulated	Prupe.3G292800	3.701	2.653	3.067	2.768	2.312	2.263		Down-regulated	Prupe.6G237300	-4.39	-3.017	-2.721	-3.416	-3.853	-3.271
UP-regulated	Prupe.3G301000	2.138	4.304	2.753	4.682	3.132	3.887		Down-regulated	Prupe.6G239500	-1.431	-2.039	-2.213	-1.965	-1.037	-1.332
UP-regulated	Prupe.3G301500	6.524	5.636	6.827	5.701	4.809	5.008		Down-regulated	Prupe.6G240500	-3.87	-4.203	-7.615	-3.659	-1.935	-4.723
UP-regulated	Prupe.3G301600	6.513	4.662	5.391	5.035	5.472	5.295		Down-regulated	Prupe.6G241300	-2.497	-2.501	-2.588	-3.161	-2.074	-1.758
UP-regulated	Prupe.3G303900	1.567	1.769	2.082	1.764	1.869	1.693		Down-regulated	Prupe.6G248700	-3.041	-2.291	-1.372	-2.002	-4.544	-2.823
UP-regulated	Prupe.3G304500	1.721	1.663	1.437	1.257	1.408	1.257		Down-regulated	Prupe.6G249200	-1.961	-2.014	-4.141	-3.377	-2.645	-1.359
UP-regulated	Prupe.3G305200	3.43	2.57	4.387	3.856	1.948	3.989		Down-regulated	Prupe.6G250100	-1.56	-2.385	-3.409	-1.828	-1.207	-3.103
UP-regulated	Prupe.3G305800	1.956	2.517	2.726	2.307	2.327	2.757		Down-regulated	Prupe.6G253700	-1.204	-1.767	-2.625	-3.685	-1.814	-1.169
UP-regulated	Prupe.3G307200	3.293	3.731	2.88	3.878	3.664	1.596		Down-regulated	Prupe.6G256000	-5.616	-4.759	-6.686	-6.596	-6.435	-4.92
UP-regulated	Prupe.3G308000	8.116	9.017	10.738	9.737	9.779	9.663		Down-regulated	Prupe.6G268000	-3.201	-3.225	-5.098	-5.013	-3.455	-1.712
UP-regulated	Prupe.3G309400	7.047	7.883	6.197	7.243	7.094	6.988		Down-regulated	Prupe.6G268300	-2.077	-2.306	-2.803	-2.699	-1.805	-1.745
UP-regulated	Prupe.3G311400	5.362	4.687	3.27	4.541	7.421	4.897		Down-regulated	Prupe.6G281200	-1.292	-2.31	-3.107	-2.582	-1.174	-2.309
UP-regulated	Prupe.3G312900	3.436	3.416	1.12	1.176	2.781	1.826		Down-regulated	Prupe.6G282500	-1.561	-0.981	-2.858	-1.001	-1.411	-1.189
UP-regulated	Prupe.3G314600	10.235	10.035	9.574	10.948	9.118	10.415		Down-regulated	Prupe.6G286600	-1.163	-1.68	-4.881	-1.982	-1.989	-1.573
UP-regulated	Prupe.3G316000	1.433	1.692	2.022	1.535	1.46	1.517		Down-regulated	Prupe.6G286900	-1.689	-2.056	-4.371	-3.274	-2.259	-1.811
UP-regulated	Prupe.4G004300	4.295	5.234	4.211	4.819	4.568	4.464		Down-regulated	Prupe.6G292200	-1.169	-1.472	-1.285	-1.283	-1.364	-1.386
UP-regulated	Prupe.4G005400	2.008	3.051	4.308	3.716	2.381	2.8		Down-regulated	Prupe.6G295300	-2.042	-3.03	-3.813	-4.562	-2.616	-2.235
UP-regulated	Prupe.4G005500	1.663	2.225	3.319	2.344	1.918	2.398		Down-regulated	Prupe.6G295800	-1.046	-4.981	-5.324	-4.031	-4.873	-3.399
UP-regulated	Prupe.4G006200	1.33	1.856	2.099	2.07	1.855	1.118		Down-regulated	Prupe.6G296300	-1.644	-2.463	-2.441	-2.397	-1.958	-1.457
UP-regulated	Prupe.4G006400	4.312	4.963	7.433	5.796	4.072	6.211		Down-regulated	Prupe.6G297400	-1.009	-2.144	-1.73	-2.509	-2.042	-2.969
UP-regulated	Prupe.4G009300	6.43	5.001	7.025	6.277	4.469	7.395		Down-regulated	Prupe.6G299900	-1.727	-2.326	-2.679	-2.839	-1.949	-1.521
UP-regulated	Prupe.4G009800	3.232	2.603	3.183	2.601	2.557	3.12		Down-regulated	Prupe.6G303100	-2.683	-1.955	-1.997	-2.892	-2.038	-1.581
UP-regulated	Prupe.4G013800	8.099	3.646	5.432	6.181	4.781	5.995		Down-regulated	Prupe.6G305000	-2.068	-3.069	-4.361	-3.149	-3.799	-3.361
UP-regulated	Prupe.4G021400	4.088	3.192	4.226	3.746	3.834	3.653		Down-regulated	Prupe.6G305800	-2.86	-3.375	-3.715	-3.835	-2.746	-2.091
UP-regulated	Prupe.4G021900	2.445	2.491	3.075	3.517	2.837	2.538		Down-regulated	Prupe.6G310900	-2.546	-2.598	-2.79	-3.167	-2.664	-1.412
UP-regulated	Prupe.4G022000	2.318	4.039	3.509	3.118	3.044	2.647		Down-regulated	Prupe.6G322000	-1.762	-2.731	-4.272	-4.182	-2.306	-1.755
UP-regulated	Prupe.4G024500	3.542	4.488	2.225	2.665	3.867	2.33		Down-regulated	Prupe.6G323300	-2.242	-2.019	-2.246	-1.823	-1.413	-2.45
UP-regulated	Prupe.4G027700	8.458	6.778	6.336	7.911	6.968	7.318		Down-regulated	Prupe.6G326000	-2.285	-2.318	-2.991	-3.311	-2.667	-1.559
UP-regulated	Prupe.4G028200	5.494	5.42	1.571	2.749	3.193	5.495		Down-regulated	Prupe.6G326100	-2.634	-3.596	-4.279	-5.31	-2.83	-2.181
UP-regulated	Prupe.4G028600	4.434	4.788	1.618	2.483	2.639	3.475		Down-regulated	Prupe.6G326300	-1.382	-2.12	-1.732	-1.919	-2.579	-1.239
UP-regulated	Prupe.4G032700	3.149	3.022	1.807	1.689	3.377	1.944		Down-regulated	Prupe.6G330200	-2.613	-2.903	-3.518	-4.281	-4.113	-2.644
UP-regulated	Prupe.4G032900	2.583	2.461	1.266	1.643	1.949	1.025		Down-regulated	Prupe.6G332700	-1.921	-1.848	-3.062	-1.819	-2.383	-1.608
UP-regulated	Prupe.4G036800	4.353	4.384	1.389	4.266	3.635	3.414		Down-regulated	Prupe.6G339600	-2.287	-4.026	-3.327	-1.909	-0.894	-2.153
UP-regulated	Prupe.4G039300	4.065	4.938	4.8	4.149	3.976	4.222		Down-regulated	Prupe.6G343700	-2.768	-3.678	-3.019	-4.043	-2.345	-1.605
UP-regulated	Prupe.4G039400	3.146	2.516	3.563	2.903	2.194	4.235		Down-regulated	Prupe.6G345000	-3.978	-2.714	-2.386	-3.42	-3.452	-1.812
UP-regulated	Prupe.4G041800	5.663	4.278	3.872	5.278	4.107	2.864		Down-regulated	Prupe.6G345600	-2.312	-2.925	-3.431	-2.229	-1.106	-3.254
UP-regulated	Prupe.4G042100	4.423	3.791	4.196	4.18	2.974	3.831		Down-regulated	Prupe.6G350800	-2.138	-2.75	-3.235	-3.974	-2.285	-1.251
UP-regulated	Prupe.4G043100	5.554	5.032	4.869	4.405	4.083	5.699		Down-regulated	Prupe.7G000700	-2.457	-3.473	-4.835	-4.659	-2.555	-1.546
UP-regulated	Prupe.4G044300	6.691	7.004	5.909	6.875	3.756	7.451		Down-regulated	Prupe.7G003500	-2.482	-3.02	-4.368	-4.221	-2.642	-1.93
UP-regulated	Prupe.4G047400	2.578	1.115	1.86	2.23	1.846	1.805		Down-regulated	Prupe.7G003900	-2.384	-1.52	-2.904	-2.674	-3.562	-1.499
UP-regulated	Prupe.4G060200	2.959	3.25	2.759	3.164	2.651	2.713		Down-regulated	Prupe.7G016100	-2.304	-3.038	-5.25	-5.919	-2.656	-1.514
UP-regulated	Prupe.4G061700	5.603	5.534	5.424	4.963	4.493	6.169		Down-regulated	Prupe.7G017800	-1.374	-1.01	-1.51	-1.329	-0.956	-1.136
UP-regulated	Prupe.4G063700	3.333	2.994	2.475	2.538	1.463	3.401		Down-regulated	Prupe.7G019800	-1.864	-1.965	-1.605	-1.97	-2.074	-1.359
UP-regulated	Prupe.4G066000	8.826	8.889	4.092	7.757	7.723	7.866		Down-regulated	Prupe.7G022200	-2.97	-3.505	-3.83	-4.321	-2.84	-1.71
UP-regulated	Prupe.4G069800	1.92	2.471	1.875	2.749	2.661	1.694		Down-regulated	Prupe.7G028500	-1.564	-1.872	-1.633	-1.346	-1.103	-1.068
UP-regulated	Prupe.4G075700	3.269	4.968	5.645	4.655	3.504	4.377		Down-regulated	Prupe.7G028600	-3.334	-3.361	-3.441	-3.352	-3.19	-3.536
UP-regulated	Prupe.4G086300	4.889	4.728	5.593	5.03	3.452	5.403		Down-regulated	Prupe.7G031400	-2.716	-3.253	-5.245	-4.962	-5.491	-2.191
UP-regulated	Prupe.4G086500	5.124	5.42	2.159	5.587	4.541	5.04		Down-regulated	Prupe.7G032900	-2.786	-7.289	-7.369	-7.28	-7.119	-4.615
UP-regulated	Prupe.4G092200	2.701	3.027	3.583	3.686	2.828	3.892		Down-regulated	Prupe.7G035800	-6.284	-6.312	-6.392	-2.848	-6.141	-4.636
UP-regulated	Prupe.4G092500	2.04	1.667	3.616	2.871	3.159	4.104		Down-regulated	Prupe.7G036100	-6.809	-8.681	-8.762	-8.672	-8.511	-8.856
UP-regulated	Prupe.4G092600	11.918	11.224	13.09	12.182	8.507	13.567		Down-regulated	Prupe.7G039200	-2.298	-3.134	-8.433	-3.078	-1.928	-3.804
UP-regulated	Prupe.4G092700	12.664	10.764	15.103	13.898	9.567	15.167		Down-regulated	Prupe.7G041600	-2.296	-1.907	-2.623	-2.666	-1.248	-3.082
UP-regulated	Prupe.4G097900	4.863	4.148	6.814	6.407	6.395	6.268		Down-regulated	Prupe.7G042500	-2.588	-3.237	-3.184	-3.876	-2.354	-2.136
UP-regulated	Prupe.4G098300	5.858	5.525	2.558	4.562	5.883	4.55		Down-regulated	Prupe.7G043700	-1.202	-1.082	-2.225	-2.206	-0.912	-1.228
UP-regulated	Prupe.4G101900	10.272	10.816	9.668	10.518	10.163	10.455		Down-regulated	Prupe.7G045800	-7.046	-7.073	-7.153	-7.063	-6.902	-4.386
UP-regulated	Prupe.4G103000	2.926	2.959	1.266	2.406	3.46	1.958		Down-regulated	Prupe.7G048900	-2.879	-3.937	-5.019	-1.939	-1.291	-6.963
UP-regulated	Prupe.4G104700	5.483	4.409	2.076	2.639	3.065	3.611		Down-regulated	Prupe.7G049600	-3.056	-2.706	-4.249	-4.318	-3.279	-2.499
UP-regulated	Prupe.4G110500	7.454	6.632	7.881	6.92	4.18	7.893		Down-regulated	Prupe.7G052800	-3.373	-3.746	-6.682	-6.745	-7.755	-2.269
UP-regulated	Prupe.4G111000	4.688	5.693	4.306	7.053	3.063	4.052		Down-regulated	Prupe.7G054100	-1.722	-2.375	-2.481	-2.142	-1.699	-1.535
UP-regulated	Prupe.4G111300	8.377	6.427	8.837	7.554	6.978	8.047		Down-regulated	Prupe.7G055300	-3.617	-4.463	-4.316	-4.065	-2.573	-2.806
UP-regulated	Prupe.4G113000	1.152	1.269	1.732	1.931	2.299	2.111		Down-regulated	Prupe.7G058200	-1.715	-1.807	-3.465	-3.411	-1.999	-1.719
UP-regulated	Prupe.4G113200	1.528	1.85	2.975	2.696	2.422	2.461		Down-regulated	Prupe.7G058700	-1.803	-2.9	-2.976	-4.168	-3.276	-1.368
UP-regulated	Prupe.4G113700	3.9	3.34	4.057	3.376	2.915	4.023		Down-regulated	Prupe.7G058800	-1.949	-3.462	-3.366	-6.457	-4.294	-1.165
UP-regulated	Prupe.4G126500	6.491	6.083	6.905	6.324	5.245	6.567		Down-regulated	Prupe.7G059900	-6.406	-6.434	-6.514	-2.57	-1.24	-1.937
UP-regulated	Prupe.4G127600	6.234	6.827	7.675	7.261	5.846	5.2		Down-regulated	Prupe.7G066100	-1.813	-1.147	-1.237	-1.397	-0.891	-1.691
UP-regulated	Prupe.4G141800	1.977	2.421	3.454	3.479	2.332	2.724		Down-regulated	Prupe.7G067300	-3.598	-3.298	-5.873	-5.05	-2.186	-2.063
UP-regulated	Prupe.4G145800	13.127	13.497	12.754	14.475	12.978	11.263		Down-regulated	Prupe.7G068000	-1.024	-1.622	-2.968	-1.573	-4.951	-2.688
UP-regulated	Prupe.4G145900	10.142	9.646	9.782	12.151	9.911	6.449		Down-regulated	Prupe.7G068600	-1.998	-2.265	-3.82	-4.728	-2.979	-2.999
UP-regulated	Prupe.4G149500	5.582	5.744	4.573	6.342	5.056	5.288		Down-regulated	Prupe.7G071700	-2.089	-2.177	-3.485	-3.784	-2.442	-1.474
UP-regulated	Prupe.4G149600	2.101	2.842	2.399	3.413	2.66	2.209		Down-regulated	Prupe.7G072600	-3.083	-2.777	-3.782	-3.229	-1.4	-3.626
UP-regulated	Prupe.4G150100	7.78	7.827	5.176	6.967	5.146	6.542		Down-regulated	Prupe.7G072700	-3.492	-2.792	-2.904	-3.48	-1.309	-3.666
UP-regulated	Prupe.4G150200	9.307	8.919	6.167	7.796	4.614	7.861		Down-regulated	Prupe.7G076900	-1.798	-1.551	-1.109	-1.419	-1.305	-1.324
UP-regulated	Prupe.4G150500	2.975	3.242	3.704	2.944	3.219	3.746		Down-regulated	Prupe.7G077000	-3.103	-2.96	-4.476	-4.842	-3.339	-2.612
UP-regulated	Prupe.4G150900	9.001	8.453	9.207	8.383	5.943	8.122		Down-regulated	Prupe.7G081300	-1.993	-4.792	-4.873	-4.783	-4.622	-4.967
UP-regulated	Prupe.4G154600	3.638	4.083	3.915	3.747	3.071	3.058		Down-regulated	Prupe.7G086100	-3.426	-2.638	-2.853	-3.967	-3.735	-2.887
UP-regulated	Prupe.4G157500	9.689	8.302	8.967	6.743	8.202	9.022		Down-regulated	Prupe.7G086200	-3.471	-2.976	-3.244	-3.121	-1.159	-3.095
UP-regulated	Prupe.4G158000	2.126	2.355	2.351	1.833	1.988	1.969		Down-regulated	Prupe.7G088000	-2.722	-2.982	-4.348	-4.934	-3.771	-2.395
UP-regulated	Prupe.4G159700	12.249	12.064	11.351	10.83	7.941	12.161		Down-regulated	Prupe.7G089700	-2.303	-2.232	-2.677	-2.062	-1.893	-1.896
UP-regulated	Prupe.4G161200	5.431	5.931	6.736	6.719	5.571	5.54		Down-regulated	Prupe.7G089900	-7.087	-8.113	-2.891	-2.576	-1.721	-3.642
UP-regulated	Prupe.4G164100	3.992	4.181	4.116	4.135	4.04	4.221		Down-regulated	Prupe.7G099800	-1.303	-1.695	-1.981	-1.86	-1.225	-1.362
UP-regulated	Prupe.4G169000	9.559	8.65	9.896	9.82	8.111	10.906		Down-regulated	Prupe.7G100000	-1.171	-2.663	-2.428	-2.607	-2.433	-2.494
UP-regulated	Prupe.4G169500	10.372	10.607	9.72	9.169	10.814	9.898		Down-regulated	Prupe.7G101300	-3.686	-2.998	-1.336	-1.055	-2.823	-2.397
UP-regulated	Prupe.4G169600	3.781	3.987	2.051	1.486	5.677	5.174		Down-regulated	Prupe.7G103600	-2.656	-3.127	-4.227	-4.707	-2.88	-1.991
UP-regulated	Prupe.4G169700	7.902	8.291	9.692	8.515	10.992	11.733		Down-regulated	Prupe.7G104000	-1.169	-2.525	-3.636	-1.948	-5.227	-1.138
UP-regulated	Prupe.4G174400	2.667	3.089	3.571	3.28	2.117	2.527		Down-regulated	Prupe.7G115300	-1.051	-1.093	-1.562	-1.289	-1.039	-1.103
UP-regulated	Prupe.4G177700	1.32	2.173	2.715	2.404	1.884	1.431		Down-regulated	Prupe.7G115600	-4.567	-4.594	-4.674	-4.584	-4.423	-4.769
UP-regulated	Prupe.4G178700	3.748	4.798	6.89	4.084	5.662	4.867		Down-regulated	Prupe.7G118100	-3.992	-2.429	-2.879	-4.372	-2.233	-3.659
UP-regulated	Prupe.4G181000	6.067	6.388	4.438	5.888	2.57	5.026		Down-regulated	Prupe.7G118800	-2.855	-1.925	-4.873	-4.783	-2.183	-3.122
UP-regulated	Prupe.4G181500	11.339	8.378	11.916	10.641	6.09	10.617		Down-regulated	Prupe.7G120400	-2.084	-1.884	-2.562	-1.901	-1.648	-2.331
UP-regulated	Prupe.4G185300	6.082	4.04	6.214	5.728	1.877	6.268		Down-regulated	Prupe.7G126700	-2.401	-2.04	-5.953	-5.986	-7.253	-1.424
UP-regulated	Prupe.4G186300	3.319	3.786	4.237	3.891	4.48	3.78		Down-regulated	Prupe.7G130600	-4.035	-2.122	-7.629	-4.686	-7.379	-4.861
UP-regulated	Prupe.4G191200	9.601	8.184	7.516	9.026	7.839	8.756		Down-regulated	Prupe.7G131600	-1.619	-1.754	-1.816	-1.953	-1.762	-1.397
UP-regulated	Prupe.4G193000	3.996	6.084	5.534	4.878	3.88	6.503		Down-regulated	Prupe.7G138900	-1.738	-2.616	-3.988	-1.766	-3.144	-2.569
UP-regulated	Prupe.4G193800	2.113	2.248	1.488	4.264	2.471	2.688		Down-regulated	Prupe.7G139300	-1.703	-2.772	-2.44	-1.115	-2.501	-1.951
UP-regulated	Prupe.4G197000	2.38	1.661	3.057	3.565	2.404	2.135		Down-regulated	Prupe.7G140500	-3.67	-4.781	-6.9	-4.347	-2.206	-3.678
UP-regulated	Prupe.4G197700	4.79	4.553	6.241	6.536	5.691	5.012		Down-regulated	Prupe.7G144800	-3.103	-2.392	-3.7	-3.594	-2.381	-1.53
UP-regulated	Prupe.4G197800	4.563	4.164	5.433	5.092	4.026	4.565		Down-regulated	Prupe.7G145800	-2.85	-3.209	-9.235	-7.286	-4.216	-3.47
UP-regulated	Prupe.4G198100	6.055	6.293	7.21	7.803	5.399	4.68		Down-regulated	Prupe.7G151400	-2.467	-1.558	-3.653	-2.388	-2.232	-2.509
UP-regulated	Prupe.4G200500	7.269	5.918	7.039	7.289	4.918	5.78		Down-regulated	Prupe.7G153000	-3.538	-2.21	-4.128	-6.852	-4.113	-1.772
UP-regulated	Prupe.4G201400	7.021	7.195	8.205	7.382	8.282	7.324		Down-regulated	Prupe.7G153100	-3.242	-2.589	-3.891	-3.928	-2.947	-1.857
UP-regulated	Prupe.4G205100	2.33	2.332	2.01	1.762	2.541	2.881		Down-regulated	Prupe.7G156800	-4.603	-1.881	-6.595	-6.506	-2.496	-3.247
UP-regulated	Prupe.4G211100	1.912	1.785	1.633	4.632	3.084	3.366		Down-regulated	Prupe.7G161800	-1.741	-1.511	-2.496	-2.149	-1.981	-1.186
UP-regulated	Prupe.4G212400	5.243	4.92	4.471	3.731	3.896	3.863		Down-regulated	Prupe.7G162500	-2.561	-5.801	-3.024	-1.596	-1.179	-4.127
UP-regulated	Prupe.4G212800	6.205	5.366	6.803	6.051	3.1	5.789		Down-regulated	Prupe.7G163900	-2.481	-1.526	-2.004	-2.339	-1.762	-1.389
UP-regulated	Prupe.4G213000	7.624	7.25	7.876	7.729	7.114	7.965		Down-regulated	Prupe.7G165500	-2.396	-2.462	-4.218	-3.227	-1.447	-3.085
UP-regulated	Prupe.4G213600	7.279	7.386	6.489	7.056	5.994	7.994		Down-regulated	Prupe.7G168100	-2.381	-3.006	-4.226	-5.099	-2.99	-1.538
UP-regulated	Prupe.4G214900	1.436	1.204	2.226	1.637	2.353	1.26		Down-regulated	Prupe.7G170400	-2.273	-2.105	-2.164	-2.326	-2.46	-2.226
UP-regulated	Prupe.4G225800	14.351	10.57	13.745	12.974	7.299	14.994		Down-regulated	Prupe.7G170500	-3.079	-2.874	-9.545	-6.457	-7.835	-5.543
UP-regulated	Prupe.4G235700	1.968	2.22	3.238	2.613	1.671	2.692		Down-regulated	Prupe.7G171000	-2.543	-2.82	-4.581	-4.871	-3.013	-1.814
UP-regulated	Prupe.4G236200	4.963	5.706	5.551	5.468	5.344	5.649		Down-regulated	Prupe.7G172300	-4.779	-6.628	-6.712	-4.298	-3.884	-4.221
UP-regulated	Prupe.4G248800	3.937	3.787	3.74	2.507	4.14	5.046		Down-regulated	Prupe.7G172500	-2.839	-3.121	-3.315	-2.997	-2.242	-2.123
UP-regulated	Prupe.4G257600	3.664	3.645	3.93	3.41	2.561	5.117		Down-regulated	Prupe.7G174000	-1.307	-1.289	-1.936	-1.687	-1.4	-1.235
UP-regulated	Prupe.4G258300	2.254	2.281	2.323	2.645	1.949	2.374		Down-regulated	Prupe.7G175700	-2.288	-2.472	-2.222	-2.443	-2.098	-2.28
UP-regulated	Prupe.4G263400	11.096	11.348	5.981	9.576	7.528	8.516		Down-regulated	Prupe.7G178000	-0.91	-1.502	-2.171	-2.614	-1.982	-1.151
UP-regulated	Prupe.4G270100	1.897	2.162	2.498	1.781	3.188	2.647		Down-regulated	Prupe.7G180800	-2.768	-3.55	-5.256	-5.218	-3.027	-2.024
UP-regulated	Prupe.4G270500	2.203	2.633	2.11	2.642	1.882	1.623		Down-regulated	Prupe.7G183100	-1.652	-1.783	-2.066	-2.127	-2.277	-1.534
UP-regulated	Prupe.4G270800	1.468	1.368	1.039	1.362	1.74	1.255		Down-regulated	Prupe.7G188800	-1.695	-2.024	-2.71	-1.769	-0.945	-1.923
UP-regulated	Prupe.4G271200	4.659	5.76	7.129	6.185	5.482	7.868		Down-regulated	Prupe.7G192200	-2.498	-2.848	-4.368	-4.897	-3.153	-1.922
UP-regulated	Prupe.4G271800	3.728	3.551	3.096	3.342	2.35	3.711		Down-regulated	Prupe.7G192900	-1.386	-1.325	-1.617	-1.404	-1.563	-1.217
UP-regulated	Prupe.4G272300	1.573	1.757	2.157	1.959	2.235	2.814		Down-regulated	Prupe.7G193000	-3.167	-2.436	-3.743	-2.68	-1.924	-3.315
UP-regulated	Prupe.4G272400	4.646	4.571	4.649	4.43	2.813	6.804		Down-regulated	Prupe.7G193500	-1.81	-2.304	-4.954	-2.787	-4.213	-2.86
UP-regulated	Prupe.4G272800	3.283	2.98	2.941	2.716	2.447	2.445		Down-regulated	Prupe.7G199300	-2.186	-2.857	-5.037	-4.873	-2.712	-1.387
UP-regulated	Prupe.4G275000	1.614	1.741	2.133	1.831	1.532	2.255		Down-regulated	Prupe.7G200300	-2.399	-2.425	-6.1	-4.49	-10.188	-2.907
UP-regulated	Prupe.4G275200	1.867	2.041	1.861	1.531	1.601	1.705		Down-regulated	Prupe.7G201300	-1.179	-1.46	-2.225	-1.658	-1.347	-1.542
UP-regulated	Prupe.4G275900	5.707	5.407	5.252	4.959	4.984	4.442		Down-regulated	Prupe.7G201400	-3.436	-3.626	-2.83	-1.837	-1.599	-2.29
UP-regulated	Prupe.4G277200	6.158	5.605	5.423	5.957	5.164	6.57		Down-regulated	Prupe.7G203300	-1.599	-2.293	-3.914	-3.259	-3.78	-1.279
UP-regulated	Prupe.4G278600	1.583	1.477	2.233	2.099	2.193	2.204		Down-regulated	Prupe.7G208400	-2.552	-1.009	-7.596	-7.148	-5.901	-3.052
UP-regulated	Prupe.4G279300	3.935	4.198	3.051	3.003	2.717	3.126		Down-regulated	Prupe.7G208500	-3.071	-1.844	-6.234	-5.105	-3.2	-3.543
UP-regulated	Prupe.4G279500	5.272	4.867	2.426	4.468	5.073	6.283		Down-regulated	Prupe.7G216100	-3.737	-3.099	-4.805	-3.356	-4.683	-5.07
UP-regulated	Prupe.4G279800	2.853	3.356	4.268	3.374	2.647	5.836		Down-regulated	Prupe.7G223700	-1.854	-1.123	-1.488	-1.163	-1.181	-1.911
UP-regulated	Prupe.4G280200	1.265	1.704	2.183	1.502	1.448	1.647		Down-regulated	Prupe.7G226500	-1.499	-2.047	-3.342	-3.381	-2.439	-1.068
UP-regulated	Prupe.4G280300	1.448	1.81	2.264	1.599	1.674	1.955		Down-regulated	Prupe.7G226800	-1.9	-2.521	-4.068	-3.41	-2.509	-1.242
UP-regulated	Prupe.4G280900	2.395	1.763	2.59	1.969	2.041	2.234		Down-regulated	Prupe.7G227500	-4.626	-4.038	-6.404	-4.049	-5.297	-3.915
UP-regulated	Prupe.4G281800	1.729	1.793	2.09	2.253	2.011	1.891		Down-regulated	Prupe.7G230100	-3.941	-6.4	-2.45	-3.526	-5.267	-6.574
UP-regulated	Prupe.4G282000	9.506	9.736	10.282	11.003	10.399	9.362		Down-regulated	Prupe.7G234800	-4.018	-5.004	-8.252	-6.869	-7.708	-4.26
UP-regulated	Prupe.4G282100	6.848	7.155	7.464	8.269	7.866	5.689		Down-regulated	Prupe.7G247500	-5.103	-5.562	-9.445	-8.066	-10.779	-5.033
UP-regulated	Prupe.4G282700	2.428	2.265	3.181	2.994	2.013	2.984		Down-regulated	Prupe.7G248700	-1.782	-1.512	-2.149	-2.059	-2.008	-1.106
UP-regulated	Prupe.4G283500	1.158	1.113	4.409	3.158	2.249	4.164		Down-regulated	Prupe.7G251800	-3.016	-3.817	-5.739	-4.612	-3.379	-2.983
UP-regulated	Prupe.4G285900	1.545	1.641	1.17	1.202	1.811	1.159		Down-regulated	Prupe.7G252700	-1.111	-1.719	-2.464	-1.961	-1.461	-1.094
UP-regulated	Prupe.4G287000	2.017	2.038	2	2.001	1.833	2.271		Down-regulated	Prupe.7G256600	-1.822	-1.52	-3.747	-2.057	-2.315	-1.66
UP-regulated	Prupe.4G288000	1.181	1.529	2.554	2.378	2.278	2.155		Down-regulated	Prupe.7G258800	-2.861	-2.58	-2.661	-2.002	-4.058	-6.612
UP-regulated	Prupe.4G288600	1.728	1.849	2.256	1.881	1.436	1.829		Down-regulated	Prupe.7G258900	-1.218	-4.145	-5.188	-5.098	-3.081	-4.32
UP-regulated	Prupe.5G004000	3.65	3.877	3.132	3.292	3.924	3.285		Down-regulated	Prupe.7G259000	-2.764	-3.058	-6.189	-4.525	-2.408	-4.768
UP-regulated	Prupe.5G004100	4.573	4.894	5.009	4.562	4.945	4.58		Down-regulated	Prupe.7G268600	-0.929	-1.164	-3.296	-2.543	-2.906	-3.301
UP-regulated	Prupe.5G004200	1.68	2.066	3.098	2.686	2.757	2.541		Down-regulated	Prupe.8G007100	-2.498	-3.686	-4.238	-2.956	-3.499	-1.65
UP-regulated	Prupe.5G011400	1.399	1.909	2.439	1.867	1.869	1.71		Down-regulated	Prupe.8G010200	-1.333	-1.868	-2.719	-3.272	-1.563	-2.556
UP-regulated	Prupe.5G015300	2.365	2.78	3.189	2.515	1.664	1.632		Down-regulated	Prupe.8G011900	-2.23	-1.822	-1.88	-2.113	-1.125	-1.434
UP-regulated	Prupe.5G016100	8.559	6.8	9.416	7.019	7.298	7.627		Down-regulated	Prupe.8G018600	-1.247	-1.585	-2.152	-2.044	-3.106	-2.747
UP-regulated	Prupe.5G016500	3.652	3.39	3.746	3.231	3.873	2.892		Down-regulated	Prupe.8G019500	-2.287	-3.229	-3.899	-3.004	-2.315	-2.725
UP-regulated	Prupe.5G020100	6.105	7.506	6.594	6.523	8.997	7.716		Down-regulated	Prupe.8G022700	-2.267	-2.408	-5.082	-2.806	-5.819	-2.362
UP-regulated	Prupe.5G021000	2.97	3.083	2.377	2.583	2.891	2.501		Down-regulated	Prupe.8G023100	-1.667	-1.843	-2.196	-2.324	-2.128	-1.647
UP-regulated	Prupe.5G023400	8.6	8.824	7.789	8.346	6.447	7.286		Down-regulated	Prupe.8G024400	-1.731	-2.627	-4.75	-2.989	-2.135	-3.917
UP-regulated	Prupe.5G023500	6.413	6.466	5.277	5.752	4.785	5.099		Down-regulated	Prupe.8G024800	-1.321	-1.435	-2.101	-1.765	-1.38	-2.304
UP-regulated	Prupe.5G023800	10.391	10.565	10.945	10.68	9.907	10.451		Down-regulated	Prupe.8G026100	-1.657	-1.036	-1.77	-1.225	-1.392	-3.664
UP-regulated	Prupe.5G024100	4.535	4.023	3.933	3.771	3.862	4.854		Down-regulated	Prupe.8G028300	-1.301	-1.591	-2.208	-0.97	-1.212	-1.524
UP-regulated	Prupe.5G025400	2.121	2.263	3.9	4.692	2.56	2.617		Down-regulated	Prupe.8G034100	-1.477	-2.067	-3.453	-1.263	-1.555	-2.234
UP-regulated	Prupe.5G027800	3.347	3.252	2.694	3.38	3.488	1.84		Down-regulated	Prupe.8G035000	-4.775	-3.84	-4.883	-4.793	-4.632	-4.976
UP-regulated	Prupe.5G033900	2.61	2.999	2.992	2.772	2.617	3.706		Down-regulated	Prupe.8G039300	-2.282	-2.538	-2.441	-3.005	-3.844	-1.426
UP-regulated	Prupe.5G034400	7.088	7.761	5.277	6.759	5.944	6.218		Down-regulated	Prupe.8G040500	-1.046	-1.286	-1.198	-1.092	-1.37	-1.377
UP-regulated	Prupe.5G034700	2.63	3.108	2.998	2.748	2.593	2.984		Down-regulated	Prupe.8G043700	-1.014	-1.345	-1.538	-1.577	-1.495	-1.317
UP-regulated	Prupe.5G035800	12.46	12.697	12.925	12.731	10.915	11.54		Down-regulated	Prupe.8G043800	-1.863	-0.93	-2.123	-2.125	-2.237	-1.704
UP-regulated	Prupe.5G036200	5.776	5.103	7.928	8.145	9.489	9.389		Down-regulated	Prupe.8G045600	-1.477	-1.761	-2.219	-1.659	-2.231	-1.239
UP-regulated	Prupe.5G042900	4.169	4.619	3.444	5.134	4.532	3.413		Down-regulated	Prupe.8G047400	-0.884	-1.524	-1.718	-0.956	-1.05	-1.937
UP-regulated	Prupe.5G044000	5.047	6.219	4.757	5.909	5.596	5.286		Down-regulated	Prupe.8G048700	-1.048	-1.984	-2.503	-2.128	-2.085	-1.277
UP-regulated	Prupe.5G044700	8.682	7.004	7.485	6.398	2.692	9.742		Down-regulated	Prupe.8G049700	-1.475	-1.122	-1.147	-1.415	-1.445	-1.107
UP-regulated	Prupe.5G045500	2.596	2.923	2.881	3.134	1.584	2.044		Down-regulated	Prupe.8G054200	-2.252	-2.635	-4.063	-4.139	-4.705	-1.906
UP-regulated	Prupe.5G047900	5.609	5.552	7.774	7.451	6.333	6.971		Down-regulated	Prupe.8G062000	-1.781	-1.199	-1.153	-1.051	-1.728	-1.659
UP-regulated	Prupe.5G048000	3.498	4.175	2.338	3.18	3.278	2.344		Down-regulated	Prupe.8G064900	-1.194	-1.036	-1.606	-1.615	-1.165	-1.559
UP-regulated	Prupe.5G054600	6.771	6.841	5.253	5.324	6.909	7.093		Down-regulated	Prupe.8G069900	-3.251	-3.407	-4.153	-4.339	-3.299	-2.293
UP-regulated	Prupe.5G057600	9.794	8.678	9.416	8.658	6.994	7.918		Down-regulated	Prupe.8G071000	-1.516	-2.058	-2.574	-2.051	-1.402	-1.144
UP-regulated	Prupe.5G059100	2.588	2.438	2.937	2.773	1.527	3.427		Down-regulated	Prupe.8G073400	-1.97	-2.036	-3.837	-3.169	-2.187	-2.105
UP-regulated	Prupe.5G063400	3.03	2.467	1.531	2.075	1.615	1.415		Down-regulated	Prupe.8G078700	-5.587	-5.614	-5.695	-5.605	-5.444	-5.789
UP-regulated	Prupe.5G067500	9.949	8.202	9.995	9.103	6.845	8.315		Down-regulated	Prupe.8G078800	-4.822	-3.829	-6.756	-6.666	-6.505	-2.398
UP-regulated	Prupe.5G074500	1.94	2.464	1.874	2.749	1.904	2.604		Down-regulated	Prupe.8G084700	-8.092	-9.081	-9.161	-9.072	-8.911	-9.256
UP-regulated	Prupe.5G075600	7.366	5.004	5.541	6.775	6.579	6.275		Down-regulated	Prupe.8G087800	-2.063	-2.63	-2.768	-2.744	-2.322	-1.709
UP-regulated	Prupe.5G076800	2.802	1.973	4.4	2.221	3.162	2.64		Down-regulated	Prupe.8G088400	-1.864	-2.463	-4.209	-3.062	-2.666	-1.877
UP-regulated	Prupe.5G077800	8.15	8.577	8.779	8.515	6.847	8.959		Down-regulated	Prupe.8G094700	-1.635	-1.875	-1.22	-2.036	-1.377	-2.05
UP-regulated	Prupe.5G080100	7.471	5.875	7.442	6.926	6.896	6.916		Down-regulated	Prupe.8G094800	-6.054	-2.645	-4.316	-3.206	-2.032	-3.394
UP-regulated	Prupe.5G084900	1.721	1.322	1.626	1.729	1.477	1.209		Down-regulated	Prupe.8G103900	-2.97	-1.21	-4.663	-2.985	-3.398	-1.286
UP-regulated	Prupe.5G086900	2.428	3.137	3.245	3.093	2.757	3.621		Down-regulated	Prupe.8G106100	-3.648	-2.998	-4.075	-8.428	-1.457	-5.753
UP-regulated	Prupe.5G087400	4.73	4.616	5.508	4.651	4.733	4.969		Down-regulated	Prupe.8G107300	-2.423	-1.861	-3.398	-2.22	-1.098	-2.577
UP-regulated	Prupe.5G088300	2.116	2.198	1.197	1.91	2.593	1.315		Down-regulated	Prupe.8G109900	-0.943	-1.199	-2.492	-1.89	-2.011	-1.742
UP-regulated	Prupe.5G088900	3.408	3.479	1.956	2.788	4.038	2.176		Down-regulated	Prupe.8G110000	-1.503	-1.657	-2.856	-2.912	-2.292	-2.426
UP-regulated	Prupe.5G089800	3.93	5.288	5.583	5.998	4.092	4.604		Down-regulated	Prupe.8G114600	-4.13	-2.585	-3.69	-1.283	-2.43	-1.659
UP-regulated	Prupe.5G092500	8.85	5.719	8.516	7.912	5.523	6.822		Down-regulated	Prupe.8G115000	-1.383	-3.113	-2.895	-2.639	-2.621	-2.872
UP-regulated	Prupe.5G092600	4.025	3.22	2.416	2.736	3.165	3.413		Down-regulated	Prupe.8G115500	-1.928	-2.772	-4.528	-4.749	-3.145	-1.559
UP-regulated	Prupe.5G093700	1.438	4.12	4.518	4.222	2.439	5.475		Down-regulated	Prupe.8G120000	-1.754	-5.166	-5.245	-5.156	-4.995	-5.34
UP-regulated	Prupe.5G095100	1.603	1.815	2.605	3.058	2.051	1.932		Down-regulated	Prupe.8G121900	-2.152	-2.338	-3.054	-2.188	-0.794	-3.018
UP-regulated	Prupe.5G101400	2.37	2.695	3.09	2.487	2.639	2.839		Down-regulated	Prupe.8G122200	-5.239	-4.66	-8.176	-8.087	-7.926	-8.271
UP-regulated	Prupe.5G101500	2.73	3.864	4.671	2.811	4.285	3.991		Down-regulated	Prupe.8G123600	-2.165	-1.677	-1.9	-1.942	-1.791	-1.618
UP-regulated	Prupe.5G102000	1.516	1.707	1.756	2.827	1.766	1.942		Down-regulated	Prupe.8G124100	-5.675	-5.702	-5.783	-5.693	-5.532	-5.877
UP-regulated	Prupe.5G102900	1.498	2.092	1.71	2.251	1.428	1.599		Down-regulated	Prupe.8G128500	-0.948	-2.407	-4.59	-4.088	-1.777	-1.301
UP-regulated	Prupe.5G105100	3.33	2.507	3.145	2.317	2.975	2.53		Down-regulated	Prupe.8G128600	-1.512	-2.531	-5.528	-3.534	-1.038	-1.724
UP-regulated	Prupe.5G107500	5.368	5.314	3.914	5.642	5.4	4.596		Down-regulated	Prupe.8G132800	-2.683	-3.648	-4.706	-4.153	-6.472	-3.906
UP-regulated	Prupe.5G107700	10.515	10.758	6.011	10.079	9.262	7.618		Down-regulated	Prupe.8G137700	-3.079	-3.21	-3.85	-2.957	-2.279	-2.414
UP-regulated	Prupe.5G108000	8.355	8.359	5.332	8.161	7.383	6.783		Down-regulated	Prupe.8G140600	-2.886	-3.114	-4.696	-5.323	-2.991	-2.053
UP-regulated	Prupe.5G108200	12.529	12.471	8.671	11.961	11.653	9.441		Down-regulated	Prupe.8G142900	-1.135	-1.53	-4.279	-1.373	-0.888	-2.614
UP-regulated	Prupe.5G108400	10.681	10.554	7.746	10.528	6.805	7.153		Down-regulated	Prupe.8G151700	-2.228	-3.598	-4.695	-4.62	-3.317	-1.892
UP-regulated	Prupe.5G108500	6.99	7.083	5.556	7.418	5.862	5.766		Down-regulated	Prupe.8G152200	-1.524	-1.164	-1.222	-1.229	-1.016	-1.378
UP-regulated	Prupe.5G108700	6.002	5.942	1.807	5.168	5.527	4.018		Down-regulated	Prupe.8G155000	-2.682	-3.346	-5.85	-3.001	-2.51	-2.048
UP-regulated	Prupe.5G109700	1.673	1.855	1.208	2.653	1.88	1.919		Down-regulated	Prupe.8G155700	-1.434	-1.362	-1.722	-1.567	-1.111	-1.275
UP-regulated	Prupe.5G111200	2.939	2.877	3.139	3.368	2.613	3.253		Down-regulated	Prupe.8G156100	-4.957	-2.649	-8.107	-8.979	-8.818	-3.395
UP-regulated	Prupe.5G111300	2.431	2.914	1.393	2.423	4.563	2.432		Down-regulated	Prupe.8G156900	-2.235	-3.001	-4.048	-5.192	-2.621	-1.579
UP-regulated	Prupe.5G116400	9.586	8.842	8.375	8.075	6.788	8.954		Down-regulated	Prupe.8G157000	-2.96	-2.637	-4.002	-4.543	-2.266	-1.514
UP-regulated	Prupe.5G116800	1.158	1.69	1.473	2.534	1.332	2.053		Down-regulated	Prupe.8G160400	-1.409	-2.522	-1.631	-1.523	-2.836	-2.497
UP-regulated	Prupe.5G119500	2.864	3.249	2.061	4.558	3.295	3.614		Down-regulated	Prupe.8G163100	-1.138	-4.571	-2.703	-1.346	-2.17	-1.769
UP-regulated	Prupe.5G123500	8.94	11.28	14.044	13.369	10.771	10.551		Down-regulated	Prupe.8G164900	-3.628	-3.292	-5.088	-5.808	-3	-2.09
UP-regulated	Prupe.5G123800	1.737	2.65	3.073	2.705	2.211	2.31		Down-regulated	Prupe.8G173100	-1.129	-1.631	-5.002	-3.593	-1.784	-1.347
UP-regulated	Prupe.5G123900	2.384	3.601	4.761	3.167	2.544	3.52		Down-regulated	Prupe.8G175200	-6.465	-7.454	-7.534	-5.584	-7.284	-7.629
UP-regulated	Prupe.5G124100	6.818	6.192	8.239	7.585	5.473	7.525		Down-regulated	Prupe.8G177900	-2.377	-3.096	-4.863	-5.42	-3.044	-1.736
UP-regulated	Prupe.5G124400	4.589	4.808	5.268	4.399	3.859	6.51		Down-regulated	Prupe.8G181900	-2.25	-1.797	-4.142	-2.91	-1.187	-3.02
UP-regulated	Prupe.5G126400	2.348	2.069	3.471	3.382	2.182	3.134		Down-regulated	Prupe.8G182400	-1.135	-1.99	-2.7	-2.198	-1.452	-1.364
UP-regulated	Prupe.5G129100	4.243	5.239	4.658	4.458	4.031	3.814		Down-regulated	Prupe.8G187400	-1.594	-1.403	-2.565	-1.91	-1.16	-2.06
UP-regulated	Prupe.5G129800	6.186	6.01	7.256	7.135	5.54	7.137		Down-regulated	Prupe.8G187900	-2.905	-3.075	-7.336	-7.247	-7.086	-3.575
UP-regulated	Prupe.5G130800	7.733	8.075	7.168	7.604	6.553	7.391		Down-regulated	Prupe.8G189200	-1.806	-2.149	-2.828	-1.651	-1.152	-3.297
PpGBSS1	Prupe.5G132800	3.208	3.492	3.995	4.132	2.926	3.993		Down-regulated	Prupe.8G189500	-1.511	-1.529	-1.584	-1.457	-1.84	-1.158
UP-regulated	Prupe.5G133100	2.66	2.984	3.113	4.452	2.616	3.321		Down-regulated	Prupe.8G190000	-1.92	-1.864	-2.375	-1.761	-0.868	-1.503
UP-regulated	Prupe.5G133200	5.273	5.687	5.327	7.133	4.86	6.035		Down-regulated	Prupe.8G190100	-1.919	-1.678	-2.067	-1.952	-2.068	-1.204
UP-regulated	Prupe.5G133800	3.563	3.389	3.566	2.713	2.503	2.978		Down-regulated	Prupe.8G190200	-2.694	-3.473	-4.528	-4.787	-3.98	-1.856
UP-regulated	Prupe.5G134100	4.408	4.33	3.257	4.287	2.062	5.112		Down-regulated	Prupe.8G194400	-1.62	-2.42	-3.449	-2.608	-2.186	-1.972
UP-regulated	Prupe.5G138300	4.411	4.615	5.623	5.036	3.593	4.897		Down-regulated	Prupe.8G195100	-2.331	-2.627	-1.753	-1.619	-0.972	-2.865
UP-regulated	Prupe.5G144200	2.185	2.219	1.062	1.342	2.085	1.378		Down-regulated	Prupe.8G195600	-7.364	-1.944	-3.156	-1.517	-1.911	-2.712
UP-regulated	Prupe.5G146400	5.318	6.201	11.464	8.309	6.707	7.766		Down-regulated	Prupe.8G195700	-4.325	-4.48	-4.265	-3.538	-4.447	-2.797
UP-regulated	Prupe.5G147300	7.955	8.603	8.33	9.213	8.631	8.388		Down-regulated	Prupe.8G199700	-3.129	-3.456	-4.525	-5.347	-2.786	-1.805
UP-regulated	Prupe.5G148400	7.225	7.844	7.334	7.858	8.005	7.314		Down-regulated	Prupe.8G203100	-3.201	-3.494	-4.103	-4.23	-2.986	-2.391
UP-regulated	Prupe.5G148500	6.417	4.744	6.273	4.593	3.625	7.069		Down-regulated	Prupe.8G203800	-6.575	-5.767	-7.631	-7.918	-11.208	-6.695
UP-regulated	Prupe.5G154000	3.669	3.925	4.257	4.29	3.46	4.136		Down-regulated	Prupe.8G209900	-2.915	-2.871	-3.124	-3.495	-2.266	-1.912
UP-regulated	Prupe.5G154600	8.747	4.235	8.842	4.59	4.251	6.953		Down-regulated	Prupe.8G217300	-1.944	-1.197	-4.036	-2.793	-3.042	-3.768
UP-regulated	Prupe.5G161100	3.074	4.032	3.64	3.161	1.56	1.562		Down-regulated	Prupe.8G219700	-2.014	-2.088	-1.733	-1.531	-2.621	-1.659
UP-regulated	Prupe.5G163500	3.602	4.114	5.073	5.503	5.106	3.694		Down-regulated	Prupe.8G220000	-5.107	-3.3	-5.215	-5.125	-4.964	-3.465
UP-regulated	Prupe.5G163700	3.643	2.914	1.84	2.809	2.97	1.678		Down-regulated	Prupe.8G220100	-2.406	-2.021	-3.267	-3.078	-2.812	-2.044
UP-regulated	Prupe.5G163800	8.449	5.267	5.719	5.33	6.275	6.518		Down-regulated	Prupe.8G220200	-5.974	-2.796	-4.056	-3.992	-3.117	-5.159
UP-regulated	Prupe.5G164000	8.926	8.332	9.512	7.251	7.356	9.161		Down-regulated	Prupe.8G223700	-2.958	-2.985	-3.321	-2.717	-1.226	-2.77
UP-regulated	Prupe.5G164100	8.29	7.737	8.079	5.378	4.47	9.064		Down-regulated	Prupe.8G225200	-3.586	-3.211	-4.956	-4.652	-2.515	-3.394
UP-regulated	Prupe.5G165500	8.934	7.378	8.452	6.735	3.047	10.341		Down-regulated	Prupe.8G226000	-1.551	-1.416	-2.544	-1.44	-1.657	-1.578
UP-regulated	Prupe.5G166500	3.306	2.817	2.445	2.586	2.24	2.379		Down-regulated	Prupe.8G232400	-4.751	-5.597	-7.811	-4.608	-1.363	-4.44
UP-regulated	Prupe.5G166900	1.975	1.843	1.438	1.338	1.915	1.483		Down-regulated	Prupe.8G233000	-1.299	-1.304	-1.149	-1.232	-1.554	-1.224
UP-regulated	Prupe.5G167000	1.895	1.81	1.27	1.288	1.419	1.296		Down-regulated	Prupe.8G240700	-1.538	-1.742	-1.799	-2.153	-2.375	-1.104
UP-regulated	Prupe.5G170700	6.574	8.835	9.071	8.434	6.092	8.216		Down-regulated	Prupe.8G241100	-1.807	-2.824	-3.423	-3.542	-3.371	-1.953
UP-regulated	Prupe.5G172600	1.638	2.931	4.736	4.811	3.221	4.014		Down-regulated	Prupe.8G242200	-2.85	-1.278	-1.086	-1.112	-0.825	-1.433
UP-regulated	Prupe.5G173600	5.766	5.936	6.202	5.69	4.419	5.653		Down-regulated	Prupe.8G250000	-2.405	-2.656	-6.353	-5.141	-2.687	-2.01
UP-regulated	Prupe.5G175600	4.085	5.365	6.733	6.665	5.741	6.239		Down-regulated	Prupe.8G251100	-4.275	-5.396	-6.287	-4.924	-2.046	-3.167
UP-regulated	Prupe.5G175900	1.215	1.258	1.76	1.473	1.576	1.094		Down-regulated	Prupe.8G251200	-2.544	-3.066	-3.192	-3.124	-1.592	-1.339
UP-regulated	Prupe.5G178400	8.84	8.807	9.715	9.842	7.81	9.386		Down-regulated	Prupe.8G251900	-2.885	-2.454	-5.123	-4.195	-3.108	-1.733
UP-regulated	Prupe.5G180800	2.766	2.973	2.589	3.34	2.356	2.989		Down-regulated	Prupe.8G252500	-2.142	-3.953	-4.443	-3.453	-2.496	-3.905
UP-regulated	Prupe.5G194400	9.002	9.85	8.714	9.347	9.229	9.268		Down-regulated	Prupe.8G252800	-1.737	-2.417	-2.394	-2.619	-2.143	-1.915
UP-regulated	Prupe.5G198700	2.723	2.68	1.653	2.082	1.721	1.931		Down-regulated	Prupe.8G254100	-1.082	-1.601	-1.613	-1.153	-1.415	-1.464
UP-regulated	Prupe.5G200900	1.757	1.768	1.942	2.063	1.977	1.386		Down-regulated	Prupe.8G256300	-2.503	-2.813	-4.719	-4.912	-3.544	-2.184
UP-regulated	Prupe.5G210800	2.229	1.984	1.802	2.785	2.697	2.229		Down-regulated	Prupe.8G256700	-2.209	-3.209	-4.815	-4.951	-4.853	-5.02
UP-regulated	Prupe.5G212300	1.653	1.878	2.496	2.126	2.566	2.474		Down-regulated	Prupe.8G261900	-1.416	-1.153	-1.067	-1.299	-0.962	-1.288
UP-regulated	Prupe.5G213900	4.217	4.298	5.443	4.709	3.907	3.604		Down-regulated	Prupe.8G264800	-3.279	-2.211	-7.594	-3.651	-2.668	-2.826
UP-regulated	Prupe.5G214000	4.914	2.907	4.252	4.57	2.295	4.334		Down-regulated	Prupe.8G270500	-2.361	-2.116	-3.546	-3.652	-2.411	-1.713
UP-regulated	Prupe.5G216100	1.675	1.727	2.352	2.121	2.026	1.589		Down-regulated	Prupe.8G272000	-1.945	-2.006	-2.941	-2.273	-1.862	-1.635
UP-regulated	Prupe.5G216400	2.061	2.27	1.729	1.501	1.541	2.067		Down-regulated	Prupe.I005400	-1.482	-1.091	-2.849	-2.095	-1.217	-2.466
UP-regulated	Prupe.5G222700	2.605	2.082	1.486	2.078	4.738	2.155
UP-regulated	Prupe.5G223600	3.992	3.774	1.775	5.415	2.715	3.505
UP-regulated	Prupe.5G225700	3.308	2.453	1.781	1.595	2.025	2.909
UP-regulated	Prupe.5G227600	6.51	7.105	6.583	7.576	6.711	6.089
UP-regulated	Prupe.5G227700	3.364	4.053	4.05	3.853	3.295	3.324
UP-regulated	Prupe.5G231000	4.656	3.837	4.684	3.927	3.09	5.102
UP-regulated	Prupe.5G235600	4.549	6.994	6.923	6.713	5.551	6.235
UP-regulated	Prupe.5G235900	4.139	4.489	4.188	6.159	3.649	4.967
UP-regulated	Prupe.5G236200	4.586	4.452	3.611	4.497	3.094	2.575
UP-regulated	Prupe.5G236300	7.489	5.259	8.174	4.389	4.244	6.936
UP-regulated	Prupe.5G236900	5.332	4.688	4.53	4.132	4.206	3.687
UP-regulated	Prupe.5G237800	3.561	4.465	2.477	5.602	1.834	4.04
UP-regulated	Prupe.5G240700	2.988	3.011	3.669	4.018	3.015	3.108
UP-regulated	Prupe.5G245900	1.566	1.962	1.287	1.617	1.269	1.422
UP-regulated	Prupe.6G005100	2.658	3.018	3.875	3.63	1.952	2.729
UP-regulated	Prupe.6G006100	4.329	5.465	5.657	5.512	5.247	5.069
UP-regulated	Prupe.6G008000	5.597	6.729	7.58	7.574	5.766	6.061
UP-regulated	Prupe.6G008300	1.484	2.32	3.279	2.666	2.124	2.204
UP-regulated	Prupe.6G008800	2.177	1.165	1.622	1.295	1.855	1.538
UP-regulated	Prupe.6G009900	3.484	3.791	2.597	2.515	1.754	5.046
UP-regulated	Prupe.6G013700	1.287	3.313	2.503	2.407	3.938	2.122
UP-regulated	Prupe.6G016100	7.245	8.424	8.4	8.292	6.609	8.166
UP-regulated	Prupe.6G019100	4.611	3.955	5.321	7.438	4.667	4.021
UP-regulated	Prupe.6G019200	8.572	9.355	10.896	11.775	9.415	8.732
UP-regulated	Prupe.6G024800	3.918	4.023	5.02	5.33	3.338	3.304
UP-regulated	Prupe.6G029000	4.058	4.803	5.79	5.088	3.851	5.017
UP-regulated	Prupe.6G030600	3.535	3.895	3.444	4.777	4.536	3.532
UP-regulated	Prupe.6G031100	6.75	7.153	3.02	6.984	6.091	6.336
UP-regulated	Prupe.6G031500	4.38	4.56	5.486	4.963	3.622	5.187
UP-regulated	Prupe.6G038200	6.167	5.933	4.189	5.164	5.486	5.832
UP-regulated	Prupe.6G039500	4.247	3.955	5.708	4.095	3.712	5.336
UP-regulated	Prupe.6G041200	8.227	9.509	7.989	9.939	6.083	7.231
UP-regulated	Prupe.6G041500	6.588	7.89	9.352	8.511	7.641	8.327
UP-regulated	Prupe.6G044000	7.873	7.601	7.09	7.97	6.421	7.589
UP-regulated	Prupe.6G044900	7.809	9.785	7.778	9.038	5.344	6.957
UP-regulated	Prupe.6G045200	6.092	6.029	6.394	6.664	5.895	7.786
UP-regulated	Prupe.6G046800	12.727	11.835	12.237	9.401	8.578	11.376
UP-regulated	Prupe.6G050900	2.348	2.067	1.225	2.154	2.198	1.804
UP-regulated	Prupe.6G054100	6.435	8.12	7.994	7.096	4.404	7.127
UP-regulated	Prupe.6G054500	3.182	3.504	2.237	5.315	2.641	3.839
UP-regulated	Prupe.6G054800	3.327	3.427	4.014	4.162	3.553	2.893
UP-regulated	Prupe.6G055300	2.228	1.973	2.45	3.433	3.75	1.904
UP-regulated	Prupe.6G056700	5.719	4.942	6.312	5.363	4.478	6.875
UP-regulated	Prupe.6G058900	6.961	7.839	9.037	9.049	8.458	7.785
UP-regulated	Prupe.6G059300	2.881	3.201	4.058	3.611	2.912	3.421
UP-regulated	Prupe.6G059600	3.111	3.429	3	3.467	3.432	2.772
UP-regulated	Prupe.6G060100	2.08	2.88	3.058	3.168	1.64	2.796
UP-regulated	Prupe.6G060200	7.557	8.211	6.748	7.674	7.353	7.409
UP-regulated	Prupe.6G060300	5.361	6.797	6.685	6.046	4.474	6.987
UP-regulated	Prupe.6G061300	9.507	6.954	6.825	7.1	7.065	7.488
UP-regulated	Prupe.6G062000	3.916	2.217	2.452	2.858	3.613	3.366
UP-regulated	Prupe.6G062300	1.712	1.88	2.199	3.225	3.412	2.104
UP-regulated	Prupe.6G062600	1.432	1.728	1.523	1.684	1.554	1.755
UP-regulated	Prupe.6G062800	2.597	1.931	2.262	2.014	3.087	2.059
UP-regulated	Prupe.6G063000	9.138	9.31	9.197	9.552	8.252	8.005
UP-regulated	Prupe.6G063800	4.899	4.944	8.25	7.453	8.457	9.128
UP-regulated	Prupe.6G064000	6.127	3.384	7.25	5.938	4.988	7.461
UP-regulated	Prupe.6G065400	4.857	4.536	2.424	4.371	4.79	4.049
UP-regulated	Prupe.6G067000	4.161	4.6	4.321	3.512	3.583	5.536
UP-regulated	Prupe.6G068800	9.089	2.807	3.011	3.544	2.04	3.062
UP-regulated	Prupe.6G068900	9.101	10.462	6.047	10.168	6.263	7.507
UP-regulated	Prupe.6G069000	12.234	13.866	14.835	14.285	12.318	14.273
UP-regulated	Prupe.6G069100	9.586	9.998	10.459	11.647	6.008	7.85
UP-regulated	Prupe.6G069700	9.303	9.818	10.72	11.474	9.512	9.051
UP-regulated	Prupe.6G069900	1.839	2.509	1.976	2.576	2.227	1.686
UP-regulated	Prupe.6G070000	3.383	2.956	2.686	2.305	3.757	2.785
UP-regulated	Prupe.6G070800	3.156	3.125	3.937	3.579	3.859	3.529
UP-regulated	Prupe.6G071800	1.918	2.24	1.507	3.581	1.829	2.552
UP-regulated	Prupe.6G076300	2.281	2.643	3.174	3.301	3.287	2.365
UP-regulated	Prupe.6G078200	6.361	6.399	6.67	6.526	5.144	5.905
UP-regulated	Prupe.6G079300	2.866	2.731	1.849	2.792	2.378	1.797
UP-regulated	Prupe.6G086700	5.82	5.907	4.418	7.118	5.861	5.715
UP-regulated	Prupe.6G087100	2.708	2.673	1.531	1.569	1.819	1.202
UP-regulated	Prupe.6G091400	6.179	7.617	5.835	7.057	7.951	7.831
UP-regulated	Prupe.6G091500	8.21	8.969	7.434	8.582	9.134	9.113
UP-regulated	Prupe.6G091600	2.005	2.189	1.785	1.733	1.914	1.883
UP-regulated	Prupe.6G094500	2.774	2.581	3.568	3.306	1.723	3.009
UP-regulated	Prupe.6G095300	1.928	1.736	2.91	2.746	2.94	2.719
UP-regulated	Prupe.6G095800	6.218	5.739	6.853	6.03	4.511	6.54
UP-regulated	Prupe.6G099700	1.701	2.401	2.23	1.657	1.526	1.946
UP-regulated	Prupe.6G107200	5.756	5.807	6.925	7.929	5.415	7.609
UP-regulated	Prupe.6G107600	1.341	1.767	2.531	2.032	1.283	2.163
UP-regulated	Prupe.6G108800	3.103	2.97	1.185	3.152	3.631	2.758
UP-regulated	Prupe.6G114400	9.067	10.038	11.382	11.36	9.677	10.532
UP-regulated	Prupe.6G116100	2.131	2.752	2.843	2.211	1.476	2.849
UP-regulated	Prupe.6G116500	6.142	6.892	5.017	5.785	5.726	4.724
UP-regulated	Prupe.6G118800	2.829	3.116	3.796	3.157	3.076	2.627
UP-regulated	Prupe.6G122200	8.003	7.896	3.202	5.857	5.906	6.533
UP-regulated	Prupe.6G124800	2.267	2.045	2.692	2.065	2.266	2.368
UP-regulated	Prupe.6G126600	6.207	7.377	6.666	7.39	6.402	7.124
UP-regulated	Prupe.6G126700	10.991	11.432	11.283	12.123	10.949	11.555
UP-regulated	Prupe.6G126900	9.898	10.159	9.087	10.276	9.631	10.112
UP-regulated	Prupe.6G128500	2.994	3.908	4.644	3.953	3.473	4.236
UP-regulated	Prupe.6G132300	3.058	4.284	5.368	5.164	4.918	3.542
UP-regulated	Prupe.6G135100	6.027	6.094	6.138	5.786	5.459	4.607
UP-regulated	Prupe.6G137300	3.752	3.925	1.546	3.647	3.395	3.324
UP-regulated	Prupe.6G139200	4.055	4.317	3.402	5.206	3.506	4.493
UP-regulated	Prupe.6G142200	6.555	5.511	6.751	7.056	6.408	8.488
UP-regulated	Prupe.6G142300	1.757	1.093	3.834	4.772	4.919	5.293
UP-regulated	Prupe.6G143100	6.037	5.187	6.592	5.675	3.727	6.538
UP-regulated	Prupe.6G144100	5.473	7.006	3.6	4.793	4.558	5.402
UP-regulated	Prupe.6G149100	4.792	5.421	7.059	7.092	5.94	6.9
UP-regulated	Prupe.6G150300	8.277	7.951	6.492	8.15	8.656	10.218
UP-regulated	Prupe.6G153400	1.479	1.731	1.542	3.913	1.787	2.596
UP-regulated	Prupe.6G154100	3.255	4.207	4.534	4.975	4.813	5.64
UP-regulated	Prupe.6G160200	7.719	8.081	8.213	9.384	8.063	7.321
UP-regulated	Prupe.6G163000	3.512	4.143	3.969	3.501	3.043	5.41
UP-regulated	Prupe.6G165500	6.71	5.833	5.045	6.876	4.334	5.966
UP-regulated	Prupe.6G166100	7.06	7.187	7.416	7.385	7.244	7.49
UP-regulated	Prupe.6G170300	4.599	4.226	4.54	5.247	4.572	4.295
UP-regulated	Prupe.6G170400	4.523	5.081	4.542	5.93	5.488	4.667
UP-regulated	Prupe.6G173200	3.72	4.263	2.839	3.238	3.597	3.933
UP-regulated	Prupe.6G173300	3.767	3.173	3.275	3.268	2.958	3.441
UP-regulated	Prupe.6G174100	1.362	1.291	1.859	1.688	1.328	1.505
UP-regulated	Prupe.6G178100	2.217	1.333	2.115	1.639	1.547	1.897
UP-regulated	Prupe.6G182400	3.589	3.41	1.671	2.022	3.169	2.869
UP-regulated	Prupe.6G182600	4.356	2.611	3.22	2.805	2.018	3.766
UP-regulated	Prupe.6G185100	4.582	4.4	1.275	4.232	5.094	2.943
UP-regulated	Prupe.6G185300	4.599	4.231	2.057	4.905	5.055	2.782
UP-regulated	Prupe.6G185400	5.101	4.76	2.981	5.575	5.513	3.824
UP-regulated	Prupe.6G185600	5.982	5.904	1.798	5.387	5.09	4.305
UP-regulated	Prupe.6G187500	10.457	9.065	9.861	10.365	8.01	9.698
UP-regulated	Prupe.6G189800	1.778	2.311	2.937	2.404	2.061	2.166
UP-regulated	Prupe.6G189900	7.093	7.189	7.35	8.086	7.884	6.816
UP-regulated	Prupe.6G192300	5.523	3.641	3.37	3.024	1.879	3.038
UP-regulated	Prupe.6G193200	3.704	3.546	2.057	4.274	3.917	3.297
UP-regulated	Prupe.6G194800	5.439	5.24	6.757	5.514	4.944	7.114
UP-regulated	Prupe.6G195500	6.625	6.923	6.669	6.258	6.561	6.606
UP-regulated	Prupe.6G196900	5.557	5.455	3.628	5.52	6.118	4.747
UP-regulated	Prupe.6G197700	8.766	9.49	9.134	9.116	9.163	8.99
UP-regulated	Prupe.6G198400	7.488	8.585	7.782	8.27	7.984	7.799
UP-regulated	Prupe.6G199400	8.397	8.844	10.759	9.974	6.518	9.988
UP-regulated	Prupe.6G200100	6.489	7.306	9.005	7.87	4.983	8.077
UP-regulated	Prupe.6G200900	7.815	8.405	9.82	9.132	7.209	10.117
UP-regulated	Prupe.6G201800	1.349	2.042	1.296	2.156	2.14	1.29
UP-regulated	Prupe.6G206800	2.188	1.489	1.178	2.342	2.529	1.124
UP-regulated	Prupe.6G207900	9.903	9.628	7.301	9.739	8.85	8.042
UP-regulated	Prupe.6G208000	8.702	8.769	6.239	7.637	6.647	6.139
UP-regulated	Prupe.6G208400	6.216	6.901	6.412	7.239	5.698	5.994
UP-regulated	Prupe.6G211500	1.864	1.723	2.895	2.179	1.792	3.524
UP-regulated	Prupe.6G212600	4.253	3.543	2.973	2.739	1.361	4.546
UP-regulated	Prupe.6G213600	6.958	9.915	10.024	8.496	7.393	10.067
UP-regulated	Prupe.6G218200	8.276	8.344	4.234	7.315	7.225	7.006
UP-regulated	Prupe.6G223000	2.627	2.918	3.918	3.073	2.139	3.334
UP-regulated	Prupe.6G223300	3.606	4.38	2.959	4.128	2.172	4.04
UP-regulated	Prupe.6G223500	4.889	4.882	6.599	5.36	3.295	5.896
UP-regulated	Prupe.6G225400	1.884	1.806	2.982	2.199	1.855	3.076
UP-regulated	Prupe.6G226600	1.994	2.866	2.961	2.951	1.583	1.201
UP-regulated	Prupe.6G226800	4.964	5.589	6.064	6.896	5.597	5.205
UP-regulated	Prupe.6G227800	9.011	7.632	9.476	8.994	6.321	8.668
UP-regulated	Prupe.6G228300	3.93	2.589	3.981	3.477	1.77	3.917
UP-regulated	Prupe.6G229800	3.427	3.613	2.023	3.345	2.852	2.918
UP-regulated	Prupe.6G232100	2.903	2.587	2.814	1.456	1.739	1.793
UP-regulated	Prupe.6G234300	2.166	2.816	3.277	2.928	2.56	2.068
PpPAL	Prupe.6G235400	1.685	2.04	1.501	2.656	2.595	1.223
UP-regulated	Prupe.6G235800	3.94	5.129	7.086	6.826	5.253	5.532
UP-regulated	Prupe.6G237000	6.714	4.057	2.201	1.537	2.547	3.297
UP-regulated	Prupe.6G241900	4.961	4.194	4.847	4.316	1.444	5.616
UP-regulated	Prupe.6G244200	1.799	1.444	1.756	1.563	1.555	1.087
UP-regulated	Prupe.6G246200	9.049	10.344	10.219	10.84	10.725	10.144
UP-regulated	Prupe.6G246900	3.065	3.395	2.732	3.337	2.254	3.395
UP-regulated	Prupe.6G249400	5.338	5.366	4.832	5.653	3.52	5.174
UP-regulated	Prupe.6G251000	6.307	7.05	7.422	6.759	6.139	5.98
UP-regulated	Prupe.6G254800	6.31	7.146	5.601	6.218	6.035	4.842
UP-regulated	Prupe.6G255100	1.886	1.846	2.095	2.224	2.189	1.597
UP-regulated	Prupe.6G257300	1.85	1.894	1.438	1.633	2.896	1.037
UP-regulated	Prupe.6G258700	4.154	4.596	3.873	4.068	3.992	4.122
UP-regulated	Prupe.6G260800	3.659	3.067	2.512	2.694	3.01	2.426
UP-regulated	Prupe.6G263100	3.392	2.152	2.051	3.942	3.713	2.734
UP-regulated	Prupe.6G263200	2.36	2.957	4.007	3.629	2.647	3.549
UP-regulated	Prupe.6G264000	8.769	8.502	7.471	7.542	5.889	9.065
UP-regulated	Prupe.6G265500	3.853	2.752	4.342	2.526	2.022	3.105
UP-regulated	Prupe.6G266600	5.814	4.862	1.829	2.811	4.404	3.71
UP-regulated	Prupe.6G268400	3.288	2.999	4.043	3.446	3.005	3.6
UP-regulated	Prupe.6G271700	7.251	6.131	5.376	5.057	6.781	5.839
UP-regulated	Prupe.6G272900	9.614	10.213	9.02	9.952	9.833	9.995
UP-regulated	Prupe.6G273500	2.856	2.325	1.56	2.833	2.07	1.022
UP-regulated	Prupe.6G274800	2.371	3.975	4.588	5.07	3.476	3.055
UP-regulated	Prupe.6G275100	3.582	3.849	3.702	3.519	2.604	3.267
UP-regulated	Prupe.6G275500	3.455	2.963	1.019	2.264	3.049	2.054
UP-regulated	Prupe.6G276800	7.6	8.924	6.934	10.642	7.433	7.563
UP-regulated	Prupe.6G277200	3.016	2.812	2.703	3.207	2.48	1.896
UP-regulated	Prupe.6G278000	2.789	2.857	2.515	2.708	2.466	2.703
UP-regulated	Prupe.6G278100	2.377	2.76	1.667	2.13	1.519	2.745
UP-regulated	Prupe.6G278400	7.367	6.219	3.712	4.769	3.488	4.909
UP-regulated	Prupe.6G282100	6.634	6.47	6.972	6.885	5.012	7.071
UP-regulated	Prupe.6G283700	8.267	9.362	10.183	8.928	8.503	9.817
UP-regulated	Prupe.6G283800	3.734	4.438	5.417	4.281	2.853	3.642
UP-regulated	Prupe.6G285200	6.007	6.766	8.62	6.8	4.613	7.916
UP-regulated	Prupe.6G286200	3.557	4.134	4.276	4.274	3.991	3.819
UP-regulated	Prupe.6G287100	1.426	2.099	2.026	2.073	1.276	1.681
UP-regulated	Prupe.6G288400	4.741	5.964	6.015	6.101	4.22	5.548
UP-regulated	Prupe.6G288600	3.34	3.054	3.745	3.472	3.232	2.759
UP-regulated	Prupe.6G290400	1.962	2.264	2.203	2.819	2.569	2.227
UP-regulated	Prupe.6G291500	1.859	2.167	2.946	2.886	2.915	1.738
UP-regulated	Prupe.6G292600	10.54	4.684	8.547	7.951	9.313	8.272
UP-regulated	Prupe.6G295600	1.54	1.986	1.103	1.753	1.449	1.843
UP-regulated	Prupe.6G296800	11.732	10.706	11.724	11.13	9.485	11.912
UP-regulated	Prupe.6G297100	8.013	9.142	10.794	9.4	7.572	8.478
UP-regulated	Prupe.6G297200	2.251	2.648	5.289	4.604	3.092	4.017
UP-regulated	Prupe.6G300100	3.612	3.554	2.861	3.175	3.483	2.488
UP-regulated	Prupe.6G303200	4.909	3.206	3.838	2.155	2.536	3.231
UP-regulated	Prupe.6G303600	1.137	1.526	1.859	1.383	1.98	1.817
UP-regulated	Prupe.6G304600	6.228	6.029	8.18	7.537	7.029	6.902
UP-regulated	Prupe.6G307800	7.443	9.092	9.907	9.584	9.381	8.559
UP-regulated	Prupe.6G311200	4.043	3.034	5.366	5.109	4.578	4.64
UP-regulated	Prupe.6G311400	4.618	5.688	8.492	8.41	7.877	7.683
UP-regulated	Prupe.6G313000	7.388	8.512	8.942	9.723	9.705	8.125
UP-regulated	Prupe.6G315800	3.297	2.834	2.857	2.867	2.616	2.103
UP-regulated	Prupe.6G319600	4.886	1.621	4.064	3.547	2.043	4.02
UP-regulated	Prupe.6G322500	2.985	2.916	1.785	3.639	2.606	2.645
UP-regulated	Prupe.6G322600	1.589	2.63	1.444	3.055	3.605	2.491
UP-regulated	Prupe.6G325800	2.028	1.834	2.072	1.908	1.752	1.732
UP-regulated	Prupe.6G332500	5.73	7.815	8.973	7.772	5.286	7.421
UP-regulated	Prupe.6G334000	4.284	4.954	5.234	5.351	4.412	3.606
UP-regulated	Prupe.6G335000	1.835	1.511	1.587	1.945	2.016	1.285
UP-regulated	Prupe.6G336600	12.575	10.855	11.925	10.659	7.301	13.954
UP-regulated	Prupe.6G342600	2.326	1.938	1.69	2.967	2.777	2.24
UP-regulated	Prupe.6G349800	11.999	8.707	10.716	10.813	8.389	10.928
UP-regulated	Prupe.6G350700	2.457	2.665	3.293	3.152	2.618	2.828
UP-regulated	Prupe.6G351100	1.411	1.997	2.35	1.998	2.295	1.701
UP-regulated	Prupe.6G351500	6.092	7.287	5.702	6.448	6.669	6.102
UP-regulated	Prupe.6G352400	10.05	9.412	10.468	9.906	6.489	10.823
UP-regulated	Prupe.6G357200	3.095	3.697	2.577	2.951	1.995	3.006
UP-regulated	Prupe.6G358500	5.758	5.154	5.082	3.879	2.433	5.367
UP-regulated	Prupe.6G360900	2.551	1.788	1.481	1.787	1.781	1.784
UP-regulated	Prupe.6G362200	4.85	4.525	3.923	4.583	3.438	5.308
UP-regulated	Prupe.6G366200	1.331	1.281	1.426	1.522	1.627	1.281
UP-regulated	Prupe.7G006100	1.577	1.978	3.202	2.644	1.479	2.733
UP-regulated	Prupe.7G011100	5.123	4.374	5.409	5.012	4.024	5.505
UP-regulated	Prupe.7G013300	10.278	10.233	12.525	12.053	11.807	12.079
UP-regulated	Prupe.7G015400	4.959	4.472	5.411	4.151	3.478	5.23
UP-regulated	Prupe.7G016300	8.973	5.834	8.388	7.062	5.788	8.881
UP-regulated	Prupe.7G023400	2.26	3.021	1.974	1.884	1.256	2.751
UP-regulated	Prupe.7G024500	1.77	2.213	1.968	2.203	1.562	1.701
UP-regulated	Prupe.7G029300	7.378	8.374	8.696	9.266	7.805	7.464
UP-regulated	Prupe.7G033200	9.851	9.648	6.79	8.587	11.037	7.876
UP-regulated	Prupe.7G035100	5.304	5.762	6.564	6.362	6.874	5.067
UP-regulated	Prupe.7G037200	1.157	2.302	2	1.754	1.75	1.323
UP-regulated	Prupe.7G041200	2.283	2.66	3.507	3.11	2.274	2.702
UP-regulated	Prupe.7G046800	8.869	8.406	8.406	9.291	8.36	9.817
UP-regulated	Prupe.7G048800	5.591	5.63	3.947	4.639	2.724	3.98
UP-regulated	Prupe.7G050900	3.526	2.253	4.9	5.479	3.273	3.965
UP-regulated	Prupe.7G051200	4.969	5.084	4.744	7.289	3.561	4.779
UP-regulated	Prupe.7G051600	7.893	5.376	6.305	6.803	7.981	7.502
UP-regulated	Prupe.7G051800	4.042	3.996	3.726	3.62	2.978	4.067
UP-regulated	Prupe.7G052400	3.749	3.596	1.739	2.914	1.583	2.903
UP-regulated	Prupe.7G053500	2.209	2.644	1.674	2.204	2.102	1.929
UP-regulated	Prupe.7G058900	2.032	1.963	1.496	1.741	2.099	1.632
UP-regulated	Prupe.7G061500	3.867	3.719	1.198	4.538	3.087	3.618
UP-regulated	Prupe.7G062600	2.69	3.38	1.643	2.903	2.021	2.806
UP-regulated	Prupe.7G064000	3.443	2.98	2.653	3.094	3.77	3.265
UP-regulated	Prupe.7G064300	1.941	2.224	1.369	2.541	1.733	1.755
UP-regulated	Prupe.7G064800	2.213	2.018	2.542	2.624	1.552	2.789
UP-regulated	Prupe.7G070100	8.577	8.505	10.856	10.76	6.897	8.869
UP-regulated	Prupe.7G071900	7.995	9.47	13.701	12.474	10.215	11.037
UP-regulated	Prupe.7G072400	10.87	10.823	9.897	9.521	5.523	9.786
UP-regulated	Prupe.7G076400	8.424	6.214	8.554	6.16	5.738	7.797
UP-regulated	Prupe.7G079700	3.642	3.983	3.482	3.591	3.316	2.994
UP-regulated	Prupe.7G080500	8.57	9.484	9.05	9.501	9.173	8.357
UP-regulated	Prupe.7G081600	2.843	1.4	1.69	1.405	1.582	1.983
UP-regulated	Prupe.7G085300	2.545	1.533	1.943	2.334	2.429	2.276
UP-regulated	Prupe.7G087500	11.092	10.577	7.639	11.421	11.356	13.186
UP-regulated	Prupe.7G089500	6.917	4.525	5.064	4.633	5.241	6.727
UP-regulated	Prupe.7G094000	5.177	5.106	2.09	4.996	4.206	4.271
UP-regulated	Prupe.7G097400	6.482	3.883	6.243	5.157	2.704	6.281
UP-regulated	Prupe.7G099500	6.788	5	6.396	5.451	3.327	5.778
UP-regulated	Prupe.7G099900	1.317	1.396	1.858	1.659	1.554	1.55
UP-regulated	Prupe.7G100400	3.671	4.092	5.44	4.291	4.318	4.152
UP-regulated	Prupe.7G100500	3.086	3.525	4.36	3.536	3.768	3.458
UP-regulated	Prupe.7G102900	2.891	2.458	4.225	3.351	3.087	3.748
UP-regulated	Prupe.7G103000	8.866	8.935	10.282	9.339	6.187	9.664
UP-regulated	Prupe.7G103400	9.708	8.428	10.315	10.073	7.415	10.097
UP-regulated	Prupe.7G105300	3.283	3.304	4.486	4.035	3.501	3.598
UP-regulated	Prupe.7G107900	6.955	4.752	6.045	5.43	3.915	6.835
UP-regulated	Prupe.7G108600	2.865	2.553	3.162	2.32	2.251	2.442
UP-regulated	Prupe.7G111000	1.908	1.263	1.676	2.165	2.163	1.523
UP-regulated	Prupe.7G113300	3.189	3.385	2.243	2.243	5.086	2.707
UP-regulated	Prupe.7G114500	3.68	3.08	1.24	3	3.101	2.581
UP-regulated	Prupe.7G116100	4.737	5.003	1.295	4.416	3.581	4.689
UP-regulated	Prupe.7G121400	10.836	10.416	11.625	10.74	6.582	12.043
UP-regulated	Prupe.7G121500	10.166	6.876	9.624	6.015	7.048	8.843
UP-regulated	Prupe.7G121600	11.045	10.868	11.775	12.094	12.718	10.93
UP-regulated	Prupe.7G123400	4.471	4.518	3.698	3.954	4.208	3.154
UP-regulated	Prupe.7G125900	2.094	2.292	1.837	1.603	2.272	2.521
UP-regulated	Prupe.7G127100	2.813	3.003	1.962	1.127	1.62	1.68
UP-regulated	Prupe.7G128600	4.785	4.146	2.753	3.949	4.047	3.417
UP-regulated	Prupe.7G131900	6.069	4.265	3.213	5.398	8.192	6.123
UP-regulated	Prupe.7G132100	7.753	8.099	4.627	7.617	6.318	7.344
UP-regulated	Prupe.7G132500	11.976	11.384	5.947	10.547	9.437	10.354
UP-regulated	Prupe.7G132700	5.482	5.126	2.731	5.53	4.627	4.434
UP-regulated	Prupe.7G135600	4.801	5.952	5.947	6.583	5.61	5.491
UP-regulated	Prupe.7G137000	11.63	11.031	9.366	8.69	8.724	11.68
UP-regulated	Prupe.7G137200	1.678	1.858	1.007	1.047	2.236	1.184
UP-regulated	Prupe.7G137500	10.148	10.822	12.582	11.387	9.512	10.968
UP-regulated	Prupe.7G137600	2.323	2.085	2.335	2.979	1.7	2.121
UP-regulated	Prupe.7G138300	3.375	4.131	2.649	4.13	1.646	2.539
UP-regulated	Prupe.7G142100	4.968	3.839	5.075	3.922	3.847	6.926
UP-regulated	Prupe.7G153500	3.611	4.378	4.926	4.496	3.032	3.826
UP-regulated	Prupe.7G153800	4.129	1.415	3.041	2.799	2.407	2.952
UP-regulated	Prupe.7G154800	3.637	3.139	3.369	2.974	2.329	4.127
UP-regulated	Prupe.7G155500	1.914	2.096	1.887	2.79	2.36	1.987
UP-regulated	Prupe.7G156200	2.261	2.381	1.779	2.092	1.793	2.153
UP-regulated	Prupe.7G158300	9.638	6.109	9.438	7.523	4.896	9.97
UP-regulated	Prupe.7G158400	3.003	3.188	4.497	4.055	3.111	2.955
UP-regulated	Prupe.7G159700	8.54	7.111	6.515	7.656	4.918	7.97
UP-regulated	Prupe.7G161900	4.279	3.775	4.564	3.929	1.726	4.379
UP-regulated	Prupe.7G162400	1.625	1.718	2.044	2.019	1.859	1.205
UP-regulated	Prupe.7G162900	10.071	11.764	10.001	9.766	9.012	11.424
UP-regulated	Prupe.7G164600	4.91	4.667	2.804	4.268	4.787	3.384
UP-regulated	Prupe.7G168200	3.88	4.452	5.045	5.571	4.497	4.781
UP-regulated	Prupe.7G169400	5.666	5.056	1.169	1.95	6.525	3.117
UP-regulated	Prupe.7G169500	4.07	4.101	4.632	3.852	3.795	4.682
UP-regulated	Prupe.7G170700	2.722	3.777	5.092	4.489	2.651	3.441
UP-regulated	Prupe.7G173700	8.437	7.828	8.664	9.859	8.709	7.593
UP-regulated	Prupe.7G176200	4.723	3.723	5.027	4.033	2.503	3.21
UP-regulated	Prupe.7G179500	2.137	1.91	1.478	1.817	1.938	1.773
UP-regulated	Prupe.7G180000	1.682	1.454	2.127	1.529	2.164	1.761
UP-regulated	Prupe.7G180100	2.773	1.862	2.621	2.402	3.558	3.136
UP-regulated	Prupe.7G187100	3.942	3.318	2.999	5.095	4.369	2.987
UP-regulated	Prupe.7G191700	8.909	9.093	11.695	10.401	9.063	9.469
UP-regulated	Prupe.7G194800	3.015	2.85	1.267	2.008	2.441	1.882
UP-regulated	Prupe.7G196500	4.314	5.16	6.476	5.213	5.782	5.407
UP-regulated	Prupe.7G197400	5.695	5.428	5.699	6.573	3.998	4.026
UP-regulated	Prupe.7G199800	1.497	1.782	1.034	1.473	1.765	1.451
UP-regulated	Prupe.7G200800	5.224	5.104	1.181	2.996	4.209	3.612
UP-regulated	Prupe.7G203000	3.575	4.878	3.491	5.14	1.77	3.549
UP-regulated	Prupe.7G204500	1.676	1.317	1.847	1.79	1.429	1.644
UP-regulated	Prupe.7G204700	1.503	1.815	1.533	1.697	1.573	1.694
UP-regulated	Prupe.7G204800	5.356	4.766	3.349	4.722	4.029	3.873
UP-regulated	Prupe.7G205500	3.973	2.907	9.146	8.419	7.271	8.953
UP-regulated	Prupe.7G209100	12.011	11.562	6.587	9.227	9.466	10.586
UP-regulated	Prupe.7G212900	2.647	2.845	1.647	1.84	2.368	2.506
UP-regulated	Prupe.7G213300	1.676	2.084	2.686	2.086	1.541	2.484
UP-regulated	Prupe.7G215500	8.375	7.581	7.386	4.997	7.801	8.833
UP-regulated	Prupe.7G215900	1.362	1.218	1.77	1.584	1.923	1.428
UP-regulated	Prupe.7G218700	1.305	1.634	1.749	2.227	1.507	1.188
UP-regulated	Prupe.7G219100	1.418	1.407	1.438	1.387	1.705	1.12
UP-regulated	Prupe.7G219300	2.684	2.735	1.945	3.033	1.932	2.684
UP-regulated	Prupe.7G221500	4.38	3.906	4.775	4.175	4.362	4.449
UP-regulated	Prupe.7G222400	2.257	2.685	1.288	2.014	1.664	1.903
UP-regulated	Prupe.7G227100	3.263	2.843	1.941	2.12	3.078	1.881
UP-regulated	Prupe.7G228300	10.408	11.816	10.514	10.987	10.716	10.675
UP-regulated	Prupe.7G229300	3.884	4.033	1.204	3.105	3.161	3.095
UP-regulated	Prupe.7G229500	5.149	5.101	2.756	5.715	4.663	4.297
UP-regulated	Prupe.7G229700	3.738	3.645	3.625	2.997	2.713	3.41
UP-regulated	Prupe.7G230000	2.148	1.936	3.005	2.503	1.428	3.297
UP-regulated	Prupe.7G232100	5.299	5.324	5.824	6.091	5.53	5.532
UP-regulated	Prupe.7G233000	2.415	2.914	3.899	3.641	3.877	3.615
UP-regulated	Prupe.7G233400	4.591	6.388	4.754	3.229	3.218	8.092
UP-regulated	Prupe.7G235300	7.61	8.082	6.223	7.092	7.18	6.907
UP-regulated	Prupe.7G239200	2.249	2.892	2.759	2.22	1.813	3.89
UP-regulated	Prupe.7G239700	2.864	3.246	4.93	4.274	2.164	3.57
UP-regulated	Prupe.7G244100	1.647	1.962	1.144	2.189	1.338	1.66
UP-regulated	Prupe.7G244700	2.028	2.287	2.282	2.377	2.758	1.991
UP-regulated	Prupe.7G248900	6.404	5.85	4.06	5.235	4.889	7.1
UP-regulated	Prupe.7G250400	3.182	3.303	1.056	1.792	2.158	2.38
UP-regulated	Prupe.7G250800	5.664	4.146	3.304	3.07	2.71	3.534
UP-regulated	Prupe.7G251300	1.179	1.987	2.285	1.577	1.585	2.124
UP-regulated	Prupe.7G251400	1.392	2.081	2.813	2.313	2.387	2.304
UP-regulated	Prupe.7G252900	3.436	2.577	3.311	3.127	2.884	3.179
UP-regulated	Prupe.7G253300	2.353	1.772	1.805	2.409	2.107	1.535
UP-regulated	Prupe.7G255300	3.272	3.573	3.03	3.99	3.208	3.133
UP-regulated	Prupe.7G255400	9.407	7.951	8.919	9.692	7.023	8.964
UP-regulated	Prupe.7G255500	3.866	3.238	3.475	4.371	3.241	3.107
UP-regulated	Prupe.7G258400	3.978	3.903	3.378	5.032	4.354	2.562
UP-regulated	Prupe.7G260700	4.132	4.436	5.296	5.055	3.254	4.5
UP-regulated	Prupe.7G261100	2.566	2.734	3.861	2.623	1.9	2.892
UP-regulated	Prupe.7G261200	2.115	1.941	2.817	2.031	1.236	2.41
UP-regulated	Prupe.7G262000	2.031	1.953	1.886	2.429	1.338	1.972
UP-regulated	Prupe.7G264000	4.966	6.225	6.973	6.396	6.624	7.699
UP-regulated	Prupe.7G266100	8.192	8.188	10.688	9.419	8.534	7.481
UP-regulated	Prupe.7G267800	2.131	1.832	2.507	2.132	1.554	2.123
UP-regulated	Prupe.7G267900	1.2	1.158	2.486	1.595	1.997	1.363
UP-regulated	Prupe.7G268200	5.648	6.407	4.494	5.236	4.743	4.991
UP-regulated	Prupe.7G268800	4.628	4.743	4.567	5.248	3.856	3.197
UP-regulated	Prupe.7G268900	2.602	2.789	2.544	2.369	1.861	2.085
UP-regulated	Prupe.7G269600	1.782	2.036	2.104	1.816	1.714	1.266
UP-regulated	Prupe.7G271400	2.664	2.735	1.616	2.529	3.381	2.006
UP-regulated	Prupe.8G000800	5.173	5.721	7.456	6.906	6.008	7.587
UP-regulated	Prupe.8G011000	1.71	2.375	2.312	5.399	3.282	2.149
UP-regulated	Prupe.8G012600	4.921	4.492	5.428	5.065	3.651	5.03
UP-regulated	Prupe.8G016000	3.479	3.293	3.617	2.913	2.398	5.339
UP-regulated	Prupe.8G020800	6.452	6.376	5.635	7.506	6.916	5.918
UP-regulated	Prupe.8G025800	11.003	10.865	10.858	11.535	11.406	11.325
UP-regulated	Prupe.8G025900	2.386	2.537	1.116	2.575	2.769	2.38
UP-regulated	Prupe.8G026500	7.826	9.578	12.18	12.574	11.221	12.142
UP-regulated	Prupe.8G026700	5.237	6.668	10.081	9.424	9.53	9.912
UP-regulated	Prupe.8G027000	2.077	2.317	6.399	5.358	5.976	6.125
UP-regulated	Prupe.8G027100	6.653	6.923	11.818	10.906	11.231	11.755
UP-regulated	Prupe.8G027300	3.46	4.462	6.972	6.222	5.377	6.174
UP-regulated	Prupe.8G027700	7.851	7.81	11.124	8.732	7.225	10.458
UP-regulated	Prupe.8G029800	9.366	8.639	9.399	8.647	4.195	8.882
UP-regulated	Prupe.8G030200	11.16	9.999	12.103	11.085	6.736	12.437
UP-regulated	Prupe.8G030700	3.99	7.038	4.475	4.686	6.239	7.592
UP-regulated	Prupe.8G032500	2.388	3.133	4.37	3.134	1.849	1.773
UP-regulated	Prupe.8G035900	1.47	1.789	3.835	4.141	1.997	2.79
UP-regulated	Prupe.8G039100	11.126	9.99	12.005	11.282	10.007	10.899
UP-regulated	Prupe.8G041600	2.407	3.164	3.169	2.949	1.581	1.918
UP-regulated	Prupe.8G047100	2.212	2.189	1.111	4.22	4.745	3.6
UP-regulated	Prupe.8G048300	7.881	8.854	8.541	8.891	7.742	8.694
UP-regulated	Prupe.8G052000	2.775	2.567	3.8	3.686	1.831	1.888
UP-regulated	Prupe.8G053300	2.313	2.828	1.555	1.731	1.898	2.046
UP-regulated	Prupe.8G058200	6.697	8.847	9.073	7.579	5.846	9.991
UP-regulated	Prupe.8G058600	9.49	9.769	10.067	9.45	8.526	9.354
UP-regulated	Prupe.8G059400	6.662	7.042	8.01	6.363	4.208	8.438
UP-regulated	Prupe.8G062700	4.133	3.693	4.587	3.866	2.174	5.97
UP-regulated	Prupe.8G063500	3.237	4.113	5.076	4.659	3.195	4.275
UP-regulated	Prupe.8G064000	2.722	3.053	2.857	3.515	2.473	2.337
UP-regulated	Prupe.8G064100	3.127	3.388	4.218	3.988	3.189	4.119
UP-regulated	Prupe.8G064500	1.883	3.609	4.575	3.559	2.637	5.544
UP-regulated	Prupe.8G066500	7.587	6.383	7.582	8.092	8.396	7.504
UP-regulated	Prupe.8G067800	9.232	10.206	6.886	10.597	7.66	10.355
UP-regulated	Prupe.8G068400	9.5	10.323	8.464	9.515	9.713	9.035
UP-regulated	Prupe.8G068700	9.262	10.536	9.335	9.68	9.708	9.313
UP-regulated	Prupe.8G068800	9.816	10.748	9.384	9.839	9.712	9.714
UP-regulated	Prupe.8G072000	8.587	6.752	8.951	8.716	4.534	9.159
UP-regulated	Prupe.8G073800	6.477	6.192	6.908	6.587	5.96	5.512
UP-regulated	Prupe.8G073900	8.024	7.714	8.454	8.851	8.074	7.258
UP-regulated	Prupe.8G082200	2.279	2.335	4.244	2.507	1.833	3.056
UP-regulated	Prupe.8G085100	1.504	3.118	3.123	2.788	1.897	3.752
UP-regulated	Prupe.8G087100	4.58	2.653	3.395	3.523	4.69	2.016
UP-regulated	Prupe.8G091200	10.139	9.008	10.252	8.979	7.315	10.158
UP-regulated	Prupe.8G092000	4.464	5.711	3.049	2.956	4.538	3.6
UP-regulated	Prupe.8G092100	4.126	4.522	4.409	4.003	3.906	4.356
UP-regulated	Prupe.8G099100	7.461	7.193	7.727	8.451	7.916	7.886
UP-regulated	Prupe.8G099200	5.391	6.051	6.95	7.432	5.178	6.679
UP-regulated	Prupe.8G101200	1.434	1.87	2.364	1.563	1.292	1.46
UP-regulated	Prupe.8G101500	6.234	6.641	6.371	7.37	6.927	6.353
UP-regulated	Prupe.8G107600	8.349	8.058	9.099	7.503	7.925	8.988
UP-regulated	Prupe.8G108500	1.463	2.691	2.533	2.515	2.222	2.166
UP-regulated	Prupe.8G110400	3.617	4.258	1.866	4.333	2.874	3.933
UP-regulated	Prupe.8G112100	2.991	3.996	2.895	2.705	3.22	2.634
UP-regulated	Prupe.8G115100	1.864	3.707	3.272	4.159	2.071	4.466
UP-regulated	Prupe.8G117300	3.768	2.367	3.167	5.504	4.291	4.449
UP-regulated	Prupe.8G122000	4.072	3.97	4.988	5.198	4.262	4.936
UP-regulated	Prupe.8G123200	7.192	7.591	7.459	6.985	6.192	7.97
UP-regulated	Prupe.8G123700	5.168	6.331	6.807	8.773	4.557	4.908
UP-regulated	Prupe.8G124400	7.609	7.918	6.543	8.954	6.543	9.147
UP-regulated	Prupe.8G125800	7.012	4.85	6.758	7.728	3.81	5.313
UP-regulated	Prupe.8G129600	2.708	3.972	2.678	3.01	3.551	3.69
UP-regulated	Prupe.8G129700	2.556	2.783	2.94	2.946	2.111	3.276
UP-regulated	Prupe.8G129800	2.536	2.977	2.92	2.886	2.002	3.99
UP-regulated	Prupe.8G130800	4.905	5.595	2.871	5.151	3.9	4.19
UP-regulated	Prupe.8G131500	7.595	7.33	8.125	6.988	3.321	10.432
UP-regulated	Prupe.8G135800	7.892	7.986	9.3	10.769	8.407	6.546
UP-regulated	Prupe.8G142600	1.395	1.296	1.914	1.511	1.337	1.878
UP-regulated	Prupe.8G147900	1.25	2.5	2.478	2.189	2.49	1.728
UP-regulated	Prupe.8G148300	1.971	2.027	4.713	4.735	1.818	2.386
UP-regulated	Prupe.8G148500	3.458	3.5	4.271	3.477	3.395	3.169
UP-regulated	Prupe.8G148600	6.468	6.689	3.823	7.007	5.864	6.884
UP-regulated	Prupe.8G148700	6.343	7.652	4.834	6.947	5.856	6.655
UP-regulated	Prupe.8G153700	5.969	3.736	4.145	7.946	3.819	7.063
UP-regulated	Prupe.8G157200	4.182	3.01	2.189	2.338	1.519	2.666
UP-regulated	Prupe.8G158200	2.784	1.638	2.704	1.12	1.472	2.172
UP-regulated	Prupe.8G160100	7.261	8.924	7.647	6.698	5.591	8.042
UP-regulated	Prupe.8G161900	2.209	2.689	1.936	2.417	1.614	1.93
UP-regulated	Prupe.8G162200	6.006	3.647	5.902	5.564	3.246	4.311
UP-regulated	Prupe.8G164100	5.345	5.213	1.09	3.884	5.357	3.707
UP-regulated	Prupe.8G168300	1.256	2.084	1.927	1.568	1.401	1.99
UP-regulated	Prupe.8G177000	5.966	6.889	7.93	6.701	5.392	6.146
UP-regulated	Prupe.8G178600	3.888	3.515	3.752	3.091	1.908	3.199
UP-regulated	Prupe.8G186200	2.724	3.431	4.248	3.687	2.109	3.359
UP-regulated	Prupe.8G186400	4.426	4.869	1.027	4.503	2.671	3.876
UP-regulated	Prupe.8G187600	4.016	3.497	4.224	3.503	1.905	3.368
UP-regulated	Prupe.8G187700	3.205	2.594	3.11	2.652	1.25	2.698
UP-regulated	Prupe.8G195200	8.221	7.476	8.191	7.461	7.846	8.191
UP-regulated	Prupe.8G195400	2.111	2.322	1.432	3.776	3.546	1.838
UP-regulated	Prupe.8G197400	1.701	1.636	2.735	2.865	1.373	2.258
UP-regulated	Prupe.8G200100	1.697	2.05	2.48	2.193	1.373	1.875
UP-regulated	Prupe.8G201000	6.671	6.013	9.134	7.952	5.9	8.395
UP-regulated	Prupe.8G211400	5.341	6.058	8.099	7.761	6.205	7.437
UP-regulated	Prupe.8G213300	8.342	7.654	7.026	5.727	7.591	7.589
UP-regulated	Prupe.8G213800	4.106	3.576	2.231	1.749	3.916	1.641
UP-regulated	Prupe.8G215200	2.844	2.874	3.217	4.047	5.025	2.646
UP-regulated	Prupe.8G215700	3.128	3.16	2.193	2.009	3.651	1.909
UP-regulated	Prupe.8G223300	1.351	1.985	9.464	2.232	1.607	4.692
UP-regulated	Prupe.8G224900	4.039	4.481	1.023	3.977	2.551	3.651
UP-regulated	Prupe.8G226800	7.72	8.822	8.781	9.043	6.487	7.565
UP-regulated	Prupe.8G229300	7.98	7.714	8.339	8.105	5.92	7.84
UP-regulated	Prupe.8G231600	1.928	2.428	2.966	2.67	1.881	3.83
UP-regulated	Prupe.8G231900	4.829	4.933	4.629	4.137	3.891	4.792
UP-regulated	Prupe.8G233800	1.533	1.731	1.844	1.672	1.383	2.046
UP-regulated	Prupe.8G236100	5.102	5.424	3.479	4.146	3.661	3.695
UP-regulated	Prupe.8G237800	6.823	7.557	6.294	6.589	6.864	6.175
UP-regulated	Prupe.8G237900	8.85	9.635	9.66	10.36	9.391	9.965
UP-regulated	Prupe.8G239600	1.214	1.645	2.205	2.023	1.508	1.586
UP-regulated	Prupe.8G244600	2.598	1.742	2.441	2.145	1.753	2.108
UP-regulated	Prupe.8G246600	4.294	4.557	4.094	3.965	1.929	3.128
UP-regulated	Prupe.8G248900	5.154	5.222	5.735	5.211	5.791	5.247
UP-regulated	Prupe.8G257200	11.195	9.309	11.163	10.098	6.626	10.815
UP-regulated	Prupe.8G261500	6.35	6.717	7.962	6.624	6.051	6.593
UP-regulated	Prupe.8G263100	2.54	2.48	2.093	2.648	2.316	2.247
UP-regulated	Prupe.8G267000	2.503	2.39	2.433	3.009	3.029	2.562
UP-regulated	Prupe.8G269000	5.081	5.192	6.281	5.343	4.216	6.318
UP-regulated	Prupe.8G269100	2.474	3.129	3.601	2.959	2.138	2.836
UP-regulated	Prupe.8G269600	6.338	6.614	3.61	6.05	7.357	6.112
UP-regulated	Prupe.8G270800	5.76	4.113	5.716	5.166	2.189	5.487
UP-regulated	Prupe.8G271100	5.546	6.373	6.292	5.609	5.806	5.819
UP-regulated	Prupe.I000900	1.754	1.977	2.649	3.241	3.056	2.114
UP-regulated	Prupe.I002900	3.902	4.208	5.255	5.178	3.941	5.022

## Sheet: Table S5
Table S5. Transcription factors distribution in up- and down-regulated.
	ID	TF family			ID	TF family
Up-regulated	Prupe.3G104100	AP2		Down-regulated	Prupe.6G203000	AP2
Up-regulated	Prupe.6G091100	AP2		Down-regulated	Prupe.1G507000	ARF
Up-regulated	Prupe.7G039600	B3		Down-regulated	Prupe.4G178100	B3
Up-regulated	Prupe.1G030500	bHLH		Down-regulated	Prupe.4G178300	B3
Up-regulated	Prupe.1G074400	bHLH		Down-regulated	Prupe.4G178400	B3
Up-regulated	Prupe.1G304900	bHLH		Down-regulated	Prupe.6G038900	B3
Up-regulated	Prupe.2G190100	bHLH		Down-regulated	Prupe.7G144200	B3
Up-regulated	Prupe.2G195300	bHLH		Down-regulated	Prupe.8G122600	B3
Up-regulated	Prupe.2G230000	bHLH		Down-regulated	Prupe.8G122700	B3
Up-regulated	Prupe.3G064500	bHLH		Down-regulated	Prupe.1G263800	bHLH
Up-regulated	Prupe.3G179800	bHLH		Down-regulated	Prupe.2G286000	bHLH
Up-regulated	Prupe.4G196600	bHLH		Down-regulated	Prupe.7G039800	bHLH
Up-regulated	Prupe.5G035400	bHLH		Down-regulated	Prupe.7G039900	bHLH
Up-regulated	Prupe.5G175200	bHLH		Down-regulated	Prupe.7G040100	bHLH
Up-regulated	Prupe.6G211900	bHLH		Down-regulated	Prupe.7G070200	bHLH
Up-regulated	Prupe.6G212000	bHLH		Down-regulated	Prupe.7G191100	bHLH
Up-regulated	Prupe.6G289300	bHLH		Down-regulated	Prupe.8G157500	bHLH
Up-regulated	Prupe.6G329600	bHLH		Down-regulated	Prupe.8G243500	bHLH
Up-regulated	Prupe.7G207500	bHLH		Down-regulated	Prupe.5G211200	bZIP
Up-regulated	Prupe.7G225800	bHLH		Down-regulated	Prupe.6G041400	bZIP
Up-regulated	Prupe.7G260800	bHLH		Down-regulated	Prupe.5G201400	C2H2
Up-regulated	Prupe.1G298200	bZIP		Down-regulated	Prupe.6G035400	C2H2
Up-regulated	Prupe.1G361100	bZIP		Down-regulated	Prupe.8G228000	C2H2
Up-regulated	Prupe.1G374400	bZIP		Down-regulated	Prupe.1G019100	CPP
Up-regulated	Prupe.1G478400	bZIP		Down-regulated	Prupe.1G473800	CPP
Up-regulated	Prupe.1G508100	bZIP		Down-regulated	Prupe.3G078800	CPP
Up-regulated	Prupe.3G246000	bZIP		Down-regulated	Prupe.6G340600	CPP
Up-regulated	Prupe.6G217300	bZIP		Down-regulated	Prupe.5G173100	Dof
Up-regulated	Prupe.7G160600	bZIP		Down-regulated	Prupe.5G180000	E2F/DP
Up-regulated	Prupe.8G091600	bZIP		Down-regulated	Prupe.6G253200	E2F/DP
Up-regulated	Prupe.1G341000	C2H2		Down-regulated	Prupe.1G390800	ERF
Up-regulated	Prupe.1G341100	C2H2		Down-regulated	Prupe.2G183200	ERF
Up-regulated	Prupe.1G424300	C2H2		Down-regulated	Prupe.3G096000	ERF
Up-regulated	Prupe.3G048600	C2H2		Down-regulated	Prupe.6G284400	ERF
Up-regulated	Prupe.5G239100	C2H2		Down-regulated	Prupe.3G060900	GATA
Up-regulated	Prupe.6G060000	C2H2		Down-regulated	Prupe.1G325000	HD-ZIP
Up-regulated	Prupe.6G238500	C2H2		Down-regulated	Prupe.1G447100	HD-ZIP
Up-regulated	Prupe.6G249300	C2H2		Down-regulated	Prupe.3G015300	HD-ZIP
Up-regulated	Prupe.6G260600	C2H2		Down-regulated	Prupe.3G218500	HD-ZIP
Up-regulated	Prupe.8G142400	C2H2		Down-regulated	Prupe.5G064300	HD-ZIP
Up-regulated	Prupe.8G234800	C2H2		Down-regulated	Prupe.2G146600	LBD
Up-regulated	Prupe.2G251000	C3H		Down-regulated	Prupe.4G138200	LBD
Up-regulated	Prupe.6G056300	C3H		Down-regulated	Prupe.8G227300	LBD
Up-regulated	Prupe.7G239900	C3H		Down-regulated	Prupe.8G227500	LBD
Up-regulated	Prupe.1G093900	CO-like		Down-regulated	Prupe.2G287500	MIKC_MADS
Up-regulated	Prupe.3G245100	CO-like		Down-regulated	Prupe.3G170600	MIKC_MADS
Up-regulated	Prupe.5G221000	CO-like		Down-regulated	Prupe.5G087500	MIKC_MADS
Up-regulated	Prupe.2G233600	Dof		Down-regulated	Prupe.7G164100	MIKC_MADS
Up-regulated	Prupe.4G042500	Dof		Down-regulated	Prupe.3G111300	M-type_MADS
Up-regulated	Prupe.4G050300	Dof		Down-regulated	Prupe.7G032000	M-type_MADS
Up-regulated	Prupe.6G079500	Dof		Down-regulated	Prupe.1G452000	MYB
Up-regulated	Prupe.7G140700	Dof		Down-regulated	Prupe.4G215500	MYB
Up-regulated	Prupe.3G009400	ERF		Down-regulated	Prupe.7G126800	MYB
Up-regulated	Prupe.2G129400	ERF		Down-regulated	Prupe.3G014900	MYB_related
Up-regulated	Prupe.1G037900	ERF		Down-regulated	Prupe.5G241000	MYB_related
Up-regulated	Prupe.1G130300	ERF		Down-regulated	Prupe.6G106200	MYB_related
Up-regulated	Prupe.1G545700	ERF		Down-regulated	Prupe.5G040400	NAC
Up-regulated	Prupe.2G129300	ERF		Down-regulated	Prupe.1G226700	NF-YC
Up-regulated	Prupe.2G272400	ERF		Down-regulated	Prupe.5G096000	NF-YC
Up-regulated	Prupe.2G289600	ERF		Down-regulated	Prupe.3G124900	TCP
Up-regulated	Prupe.3G032300	ERF		Down-regulated	Prupe.1G432100	WOX
Up-regulated	Prupe.3G157100	ERF		Down-regulated	Prupe.4G101100	WRKY
Up-regulated	Prupe.5G061800	ERF
Up-regulated	Prupe.5G062000	ERF
Up-regulated	Prupe.5G065300	ERF
Up-regulated	Prupe.5G090000	ERF
Up-regulated	Prupe.5G090100	ERF
Up-regulated	Prupe.5G213800	ERF
Up-regulated	Prupe.7G194400	ERF
Up-regulated	Prupe.8G125100	ERF
Up-regulated	Prupe.8G224600	ERF
Up-regulated	Prupe.1G387800	G2-like
Up-regulated	Prupe.1G340500	G2-like
Up-regulated	Prupe.3G027400	G2-like
Up-regulated	Prupe.3G127700	G2-like
Up-regulated	Prupe.3G163500	G2-like
Up-regulated	Prupe.4G128000	G2-like
Up-regulated	Prupe.5G023700	G2-like
Up-regulated	Prupe.5G028400	G2-like
Up-regulated	Prupe.6G254900	G2-like
Up-regulated	Prupe.6G282300	G2-like
Up-regulated	Prupe.6G351000	G2-like
Up-regulated	Prupe.7G075300	G2-like
Up-regulated	Prupe.8G086100	GATA
Up-regulated	Prupe.3G162500	GRAS
Up-regulated	Prupe.6G073800	GRAS
Up-regulated	Prupe.6G223200	GRAS
Up-regulated	Prupe.6G282800	GRAS
Up-regulated	Prupe.7G236100	GRAS
Up-regulated	Prupe.2G127300	HD-ZIP
Up-regulated	Prupe.2G291400	HD-ZIP
Up-regulated	Prupe.2G004000	HD-ZIP
Up-regulated	Prupe.2G194400	HD-ZIP
Up-regulated	Prupe.5G029000	HD-ZIP
Up-regulated	Prupe.7G079300	HD-ZIP
Up-regulated	Prupe.2G292100	HSF
Up-regulated	Prupe.4G068100	HSF
Up-regulated	Prupe.7G231100	HSF
Up-regulated	Prupe.8G234900	HSF
Up-regulated	Prupe.2G256200	LBD
Up-regulated	Prupe.1G424400	LBD
Up-regulated	Prupe.2G191100	LBD
Up-regulated	Prupe.5G167800	LBD
Up-regulated	Prupe.8G142100	LBD
Up-regulated	Prupe.6G208900	MIKC_MADS
Up-regulated	Prupe.1G549600	MIKC_MADS
Up-regulated	Prupe.5G208500	MIKC_MADS
Up-regulated	Prupe.3G274800	MYB
Up-regulated	Prupe.3G227900	MYB
Up-regulated	Prupe.4G034000	MYB
Up-regulated	Prupe.1G051300	MYB
Up-regulated	Prupe.1G323400	MYB
Up-regulated	Prupe.1G405400	MYB
Up-regulated	Prupe.1G417400	MYB
Up-regulated	Prupe.2G192100	MYB
Up-regulated	Prupe.3G006300	MYB
Up-regulated	Prupe.3G042100	MYB
Up-regulated	Prupe.3G227800	MYB
Up-regulated	Prupe.4G126900	MYB
Up-regulated	Prupe.4G136300	MYB
Up-regulated	Prupe.5G031700	MYB
Up-regulated	Prupe.5G077500	MYB
Up-regulated	Prupe.6G085000	MYB
Up-regulated	Prupe.6G188300	MYB
Up-regulated	Prupe.6G303300	MYB
Up-regulated	Prupe.7G128800	MYB
Up-regulated	Prupe.7G216000	MYB
Up-regulated	Prupe.8G016100	MYB
Up-regulated	Prupe.8G164300	MYB
Up-regulated	Prupe.1G031200	MYB_related
Up-regulated	Prupe.2G307600	MYB_related
Up-regulated	Prupe.6G256900	MYB_related
Up-regulated	Prupe.7G212300	MYB_related
Up-regulated	Prupe.8G058100	NAC
Up-regulated	Prupe.1G454900	NAC
Up-regulated	Prupe.1G560100	NAC
Up-regulated	Prupe.1G587100	NAC
Up-regulated	Prupe.2G202400	NAC
Up-regulated	Prupe.3G178000	NAC
Up-regulated	Prupe.3G310600	NAC
Up-regulated	Prupe.4G138500	NAC
Up-regulated	Prupe.6G134400	NAC
Up-regulated	Prupe.7G001200	NAC
Up-regulated	Prupe.7G013900	NAC
Up-regulated	Prupe.7G217000	NAC
Up-regulated	Prupe.8G174800	NAC
Up-regulated	Prupe.3G043900	NF-YA
Up-regulated	Prupe.7G093100	NF-YA
Up-regulated	Prupe.8G256000	NF-YB
Up-regulated	Prupe.1G152500	NF-YC
Up-regulated	Prupe.1G223500	SBP
Up-regulated	Prupe.1G290200	SBP
Up-regulated	Prupe.3G308100	SBP
Up-regulated	Prupe.4G050400	SBP
Up-regulated	Prupe.2G036500	SRS
Up-regulated	Prupe.8G088300	SRS
Up-regulated	Prupe.1G486200	TALE
Up-regulated	Prupe.5G104600	TALE
Up-regulated	Prupe.6G105100	TALE
Up-regulated	Prupe.7G254700	TALE
Up-regulated	Prupe.1G070500	TCP
Up-regulated	Prupe.1G272500	TCP
Up-regulated	Prupe.3G252600	TCP
Up-regulated	Prupe.4G083500	TCP
Up-regulated	Prupe.5G088800	TCP
Up-regulated	Prupe.5G217200	TCP
Up-regulated	Prupe.6G341000	Trihelix
Up-regulated	Prupe.8G028800	Trihelix
Up-regulated	Prupe.2G302500	WRKY
Up-regulated	Prupe.1G223200	WRKY
Up-regulated	Prupe.1G393000	WRKY
Up-regulated	Prupe.2G177800	WRKY
Up-regulated	Prupe.2G231300	WRKY
Up-regulated	Prupe.2G265000	WRKY
Up-regulated	Prupe.3G002300	WRKY
Up-regulated	Prupe.3G098100	WRKY
Up-regulated	Prupe.5G074200	WRKY
Up-regulated	Prupe.5G117000	WRKY
Up-regulated	Prupe.6G168200	WRKY
Up-regulated	Prupe.6G286000	WRKY
Up-regulated	Prupe.6G295000	WRKY
Up-regulated	Prupe.6G295100	WRKY
Up-regulated	Prupe.8G265900	WRKY
Up-regulated	Prupe.7G155700	ZF-HD

## Sheet: Table S6
Table S6. Candidate genes that may be related to adventitious roots formation of cotyledon-derived callus in peach.
			CC3W-ZY			CC6W-ZY			CC5Y-ZY			CC3W-ZH			CC6W-ZH			CC3W-QQ			CC6W-QQ
Classification	Abbreviation	ID	Y0-1a	Y0-1b	Y0-1c	Y0-2a	Y0-2b	Y0-2c	Y0-3a	Y0-3b	Y0-3c	Y0-4a	Y0-4b	Y0-4c	Y0-5a	Y0-5b	Y0-5c	Y0-6a	Y0-6b	Y0-6c	Y0-7a	Y0-7b	Y0-7c	chr	start	end	strand	gene_name	gene_description	KEGG	NR	Swissprot	Tremble	KOG	GO	Pfam
Transcriptional factors	PpbHLH123	Prupe.4G196600	3	3.68	3.64	0.88	0.84	1.17	0	0	0.02	2.07	1.87	1.46	1.67	1.25	1.47	0.3	0.15	0.12	1.14	0.82	0.8	Pp04	11992859	11996137	-	Prupe.4G196600	--	K16189 phytochrome-interacting factor 4 | (RefSeq) transcription factor PIF4 isoform X1 (A)	transcription factor bHLH123 [Prunus persica]	RecName: Full=Transcription factor bHLH123; AltName: Full=Basic helix-loop-helix protein 123; Short=AtbHLH123; Short=bHLH 123; AltName: Full=Transcription factor EN 63; AltName: Full=bHLH transcription factor bHLH123;	SubName: Full=Uncharacterized protein {ECO:0000313|EMBL:EMJ14218.1};	--	GO:0005634,nucleus; GO:0001046,core promoter sequence-specific DNA binding; GO:0003700,DNA-binding transcription factor activity; GO:0046983,protein dimerization activity; GO:0001228,DNA-binding transcription activator activity, RNA polymerase II-specific; GO:0006366,transcription by RNA polymerase II	Mitochondrial import receptor subunit Tom22
Transcriptional factors	PpbHLH68	Prupe.7G225800	14.68	11.89	11.44	10.69	7.13	8.54	0.05	0.2	0.15	36.78	34.47	35.73	16.45	16.16	14.08	3.3	2.93	3.32	33.43	32.78	32.73	Pp07	20020495	20024534	+	Prupe.7G225800	--	--	transcription factor bHLH68 [Prunus persica]	RecName: Full=Transcription factor bHLH68; AltName: Full=Basic helix-loop-helix protein 68; Short=AtbHLH68; Short=bHLH 68; AltName: Full=Transcription factor EN 60; AltName: Full=bHLH transcription factor bHLH068;	SubName: Full=Uncharacterized protein {ECO:0000313|EMBL:EMJ05556.1};	--	GO:0005634,nucleus; GO:0001046,core promoter sequence-specific DNA binding; GO:0003700,DNA-binding transcription factor activity; GO:0046983,protein dimerization activity; GO:0001228,DNA-binding transcription activator activity, RNA polymerase II-specific; GO:0006355,regulation of transcription, DNA-templated; GO:0006366,transcription by RNA polymerase II	--
Transcriptional factors	PpDof1.4	Prupe.4G042500	7.81	6.59	7.37	4.56	3.45	4.11	0	0	0	3.79	3.6	3.15	8.56	8.86	7.63	0.64	0.69	0.88	3.99	2.94	3.96	Pp04	2001506	2003763	-	Prupe.4G042500	--	--	dof zinc finger protein DOF1.4 [Prunus persica]	RecName: Full=Dof zinc finger protein 4 {ECO:0000305}; Short=OsDof4 {ECO:0000303|Ref.1};	SubName: Full=Uncharacterized protein {ECO:0000313|EMBL:EMJ14707.1};	--	GO:0005634,nucleus; GO:0003677,DNA binding; GO:0046872,metal ion binding; GO:0006355,regulation of transcription, DNA-templated; GO:0006351,transcription, DNA-templated	Dof domain, zinc finger
Transcriptional factors	PpDof2.4	Prupe.6G079500	7.35	6.4	7.79	3.04	2.96	2.44	0.09	0.21	0.06	7.48	7.13	7.05	3.52	3.58	4	0.49	0.51	0.34	8.55	7.57	7.14	Pp06	5416335	5418276	-	Prupe.6G079500	--	--	dof zinc finger protein DOF2.4 [Prunus persica]	RecName: Full=Dof zinc finger protein DOF2.4; Short=AtDOF2.4;	SubName: Full=Uncharacterized protein {ECO:0000313|EMBL:ONI00275.1};	--	GO:0005634,nucleus; GO:0003700,DNA-binding transcription factor activity; GO:0046872,metal ion binding; GO:0043565,sequence-specific DNA binding; GO:0044212,transcription regulatory region DNA binding; GO:0006355,regulation of transcription, DNA-templated; GO:0006351,transcription, DNA-templated	Dof domain, zinc finger
Transcriptional factors	PpERF109	Prupe.8G125100	80.76	70.3	64.04	102.82	98.95	97.93	0	0	0	14.7	15.34	17.55	195.99	184.09	179.08	20.55	22.48	19.31	91.65	106.98	116.65	Pp08	15010788	15011616	-	Prupe.8G125100	--	K09286 EREBP-like factor | (RefSeq) ethylene-responsive transcription factor ERF071 (A)	ethylene-responsive transcription factor ERF109 [Prunus persica]	RecName: Full=Ethylene-responsive transcription factor ERF109;	SubName: Full=Uncharacterized protein {ECO:0000313|EMBL:EMJ00506.1};	--	GO:0005634,nucleus; GO:0003677,DNA binding; GO:0003700,DNA-binding transcription factor activity; GO:0051301,cell division; GO:0050832,defense response to fungus; GO:0009873,ethylene-activated signaling pathway; GO:0010087,phloem or xylem histogenesis; GO:0010200,response to chitin; GO:0006351,transcription, DNA-templated	AP2 domain
Transcriptional factors	PpARR21	Prupe.6G254900	0.15	0.14	0.07	0.1	0.1	0.11	0.04	0.01	0.03	0.82	0.82	1.07	0.93	0.79	0.96	0.26	0.23	0.14	0.24	0.18	0.25	Pp06	24798246	24803027	-	Prupe.6G254900	--	K14491 two-component response regulator ARR-B family | (RefSeq) two-component response regulator ARR2 isoform X2 (A)	hypothetical protein PRUPE_6G254900 [Prunus persica]	RecName: Full=Two-component response regulator ARR2; AltName: Full=Receiver-like protein 5;	SubName: Full=Uncharacterized protein {ECO:0000313|EMBL:ONI03403.1};	GATA-4/5/6 transcription factors	GO:0005634,nucleus; GO:0003677,DNA binding; GO:0003700,DNA-binding transcription factor activity; GO:0000156,phosphorelay response regulator activity; GO:0071368,cellular response to cytokinin stimulus; GO:0009736,cytokinin-activated signaling pathway; GO:0009873,ethylene-activated signaling pathway; GO:0010150,leaf senescence; GO:0010082,regulation of root meristem growth; GO:0080113,regulation …	--
Transcriptional factors	PpANL2	Prupe.2G291400	1.09	0.93	1.51	1.12	1.26	1.12	0.04	0.17	0	0.4	0.4	0.59	0.4	0.57	0.4	1.87	1.95	1.91	0.97	1.05	1.1	Pp02	28494023	28500541	+	Prupe.2G291400	--	K09338 homeobox-leucine zipper protein | (RefSeq) homeobox-leucine zipper protein HDG7 isoform X1 (A)	homeobox-leucine zipper protein HDG7 isoform X1 [Prunus persica]	RecName: Full=Homeobox-leucine zipper protein ANTHOCYANINLESS 2; AltName: Full=HD-ZIP protein ANL2; AltName: Full=Homeodomain protein AHDP; AltName: Full=Homeodomain transcription factor ANL2;	SubName: Full=Uncharacterized protein {ECO:0000313|EMBL:ONI25244.1};	--	GO:0005634,nucleus; GO:0003700,DNA-binding transcription factor activity; GO:0008289,lipid binding; GO:0043565,sequence-specific DNA binding; GO:0043481,anthocyanin accumulation in tissues in response to UV light; GO:0042335,cuticle development; GO:0009827,plant-type cell wall modification; GO:0048364,root development; GO:0048765,root hair cell differentiation; GO:0006351,transcription, DNA-templ…	Homeodomain leucine-zipper encoding, Homez
Transcriptional factors	PpLBD1	Prupe.2G191100	2.99	2.13	2.75	0.77	0.73	0.71	0	0	0	0.44	0.39	0.41	0.79	0.67	0.48	1.79	0.43	1.27	4.03	5.14	3.94	Pp02	23050006	23050840	-	Prupe.2G191100	--	K21994 LOB domain-containing protein 18 | (RefSeq) LOB domain-containing protein 18 (A)	LOB domain-containing protein 1 [Prunus persica]	RecName: Full=LOB domain-containing protein 1; AltName: Full=ASYMMETRIC LEAVES 2-like protein 8; Short=AS2-like protein 8;	SubName: Full=Uncharacterized protein {ECO:0000313|EMBL:ONI23493.1};	--	GO:0005739,mitochondrion	Lateral organ boundaries (LOB) domain
Transcriptional factors	PpMYB114	Prupe.3G042100	0.81	0.47	0.3	0.28	0.35	0.17	0	0	0	0.87	1.29	0.8	0.42	0.37	0.46	0.08	0.04	0.29	0.63	0.76	0.34	Pp03	2999700	3001163	+	Prupe.3G042100	--	K09422 transcription factor MYB, plant | (RefSeq) transcription factor WER isoform X1 (A)	transcription factor WER isoform X1 [Prunus persica]	RecName: Full=Transcription factor WER; AltName: Full=Myb-related protein 66; Short=AtMYB66; AltName: Full=Protein WEREWOLF;	SubName: Full=Uncharacterized protein {ECO:0000313|EMBL:EMJ17664.1};	Transcription factor, Myb superfamily	GO:0005634,nucleus; GO:0003677,DNA binding; GO:0003700,DNA-binding transcription factor activity; GO:0000981,DNA-binding transcription factor activity, RNA polymerase II-specific; GO:0043565,sequence-specific DNA binding; GO:0001135,RNA polymerase II transcription regulator recruiting activity; GO:0044212,transcription regulatory region DNA binding; GO:0045165,cell fate commitment; GO:0045893,pos…	Myb-like DNA-binding domain
Transcriptional factors	PpRAX2	Prupe.7G128800	9.97	6.76	7.52	11.9	9.86	10.15	1.39	1.56	1.86	20.15	20.63	20.88	25.73	18.51	19.02	4.74	4.39	4.38	5.97	6.27	5.59	Pp07	14904293	14907624	+	Prupe.7G128800	--	K09422 transcription factor MYB, plant | (RefSeq) transcription factor RAX2 (A)	transcription factor RAX2 [Prunus persica]	RecName: Full=Transcription factor MYB36 {ECO:0000303|PubMed:9839469}; AltName: Full=Myb-related protein 36 {ECO:0000303|PubMed:9839469}; Short=AtMYB36 {ECO:0000303|PubMed:9839469};	SubName: Full=Uncharacterized protein {ECO:0000313|EMBL:EMJ03439.1};	Transcription factor, Myb superfamily	GO:0048226,Casparian strip; GO:0005634,nucleus; GO:0003700,DNA-binding transcription factor activity; GO:0000981,DNA-binding transcription factor activity, RNA polymerase II-specific; GO:0043565,sequence-specific DNA binding; GO:0001135,RNA polymerase II transcription regulator recruiting activity; GO:0044212,transcription regulatory region DNA binding; GO:0030154,cell differentiation; GO:0035987…	Myb-like DNA-binding domain
Transcriptional factors	PpMYB6	Prupe.7G216000	2.59	1.51	2.21	0.86	0.75	0.95	0	0	0.03	0.51	0.36	0.59	1.3	1.11	0.98	0.03	0.13	0.25	1.12	1.39	0.83	Pp07	19533658	19535476	-	Prupe.7G216000	--	K09422 transcription factor MYB, plant | (RefSeq) transcription factor MYB6 (A)	hypothetical protein PRUPE_7G216000 [Prunus persica]	RecName: Full=Transcription factor RAX3; AltName: Full=Myb-related protein 84; Short=AtMYB84; AltName: Full=Protein REGULATOR OF AXILLARY MERISTEMS 3;	SubName: Full=Uncharacterized protein {ECO:0000313|EMBL:ONH97882.1};	Transcription factor, Myb superfamily	GO:0005634,nucleus; GO:0003700,DNA-binding transcription factor activity; GO:0000981,DNA-binding transcription factor activity, RNA polymerase II-specific; GO:0043565,sequence-specific DNA binding; GO:0001135,RNA polymerase II transcription regulator recruiting activity; GO:0044212,transcription regulatory region DNA binding; GO:0030154,cell differentiation; GO:0007275,multicellular organism deve…	Myb-like DNA-binding domain
Transcriptional factors	PpLRP1	Prupe.2G036500	13.29	13.28	11.99	5.07	4.48	3.83	0.98	0.83	1.27	6.65	5.52	6.52	5.72	5.66	4.45	5.18	4.82	4.98	12.59	13.34	13.45	Pp02	3943572	3946596	+	Prupe.2G036500	--	--	protein LATERAL ROOT PRIMORDIUM 1 isoform X1 [Prunus persica]	RecName: Full=Protein LATERAL ROOT PRIMORDIUM 1;	SubName: Full=Uncharacterized protein {ECO:0000313|EMBL:ONI20839.1};	--	GO:0005634,nucleus; GO:0003677,DNA binding; GO:0046872,metal ion binding; GO:0042803,protein homodimerization activity; GO:0009851,auxin biosynthetic process; GO:0009734,auxin-activated signaling pathway; GO:0009733,response to auxin; GO:0048364,root development	Domain of unknown function (DUF702)
Transcriptional factors	PpSRS3	Prupe.8G088300	1.79	2.1	1.73	0.9	0.43	0.49	0	0	0	1.82	1.78	2.04	1.68	1.49	1.59	0.15	0.32	0.13	3.7	3.4	2.8	Pp08	12137883	12139434	+	Prupe.8G088300	--	--	protein SHI RELATED SEQUENCE 3 [Prunus persica]	RecName: Full=Protein SHI RELATED SEQUENCE 3;	SubName: Full=Uncharacterized protein {ECO:0000313|EMBL:ONH91011.1};	--	GO:0005634,nucleus; GO:0003677,DNA binding; GO:0046872,metal ion binding; GO:0009851,auxin biosynthetic process; GO:0009734,auxin-activated signaling pathway; GO:0007275,multicellular organism development	Domain of unknown function (DUF702)
Transcriptional factors	PpWRKY75	Prupe.1G223200	95.78	68.14	66.01	66.37	57.92	59.54	3.25	5.2	2.81	71.85	69.47	68.8	84.6	65.89	69	55.48	58.62	49.4	48.75	48.01	46.32	Pp01	23707911	23710210	+	Prupe.1G223200	--	K18835 WRKY transcription factor 2 | (RefSeq) probable WRKY transcription factor 2 (A)	probable WRKY transcription factor 75 [Prunus persica]	RecName: Full=Probable WRKY transcription factor 75; AltName: Full=WRKY DNA-binding protein 75;	SubName: Full=Uncharacterized protein {ECO:0000313|EMBL:EMJ27396.1};	--	GO:0005634,nucleus; GO:0003700,DNA-binding transcription factor activity; GO:0000978,RNA polymerase II proximal promoter sequence-specific DNA binding; GO:0044212,transcription regulatory region DNA binding; GO:0010055,atrichoblast differentiation; GO:0048527,lateral root development; GO:0000122,negative regulation of transcription by RNA polymerase II; GO:0043620,regulation of DNA-templated tran…	WRKY DNA -binding domain
Transcriptional factors	PpPTI6	Prupe.2G183200	0	0	0	0.18	0	0.15	0.35	0.47	0.63	0.11	0.07	0.07	0.04	0	0.11	0	0	0	0.03	0.1	0.13	Pp02	22540883	22542310	+	Prupe.2G183200	--	K13434 pathogenesis-related genes transcriptional activator PTI6 | (RefSeq) pathogenesis-related genes transcriptional activator PTI6 (A)	pathogenesis-related genes transcriptional activator PTI6 [Prunus persica]	RecName: Full=Ethylene-responsive transcription factor CRF4; AltName: Full=Protein CYTOKININ RESPONSE FACTOR 4;	SubName: Full=Uncharacterized protein {ECO:0000313|EMBL:EMJ20511.1};	--	GO:0005737,cytoplasm; GO:0005634,nucleus; GO:0003677,DNA binding; GO:0003700,DNA-binding transcription factor activity; GO:0009736,cytokinin-activated signaling pathway; GO:0009873,ethylene-activated signaling pathway; GO:0048366,leaf development; GO:0006351,transcription, DNA-templated	AP2 domain
Transcriptional factors	PpAIL6	Prupe.6G203000	20.58	18.52	18.36	10.43	10.58	11.51	102.05	99.51	101.73	2.23	2.8	2.39	5.08	6.15	5.7	16.19	15.28	14.73	16.03	14.39	15.65	Pp06	21051434	21056719	+	Prupe.6G203000	--	K09285 AP2-like factor, ANT lineage | (RefSeq) AP2-like ethylene-responsive transcription factor AIL6 (A)	AP2-like ethylene-responsive transcription factor AIL6 [Prunus persica]	RecName: Full=AP2-like ethylene-responsive transcription factor AIL6; AltName: Full=Protein AINTEGUMENTA-LIKE 6;	SubName: Full=Uncharacterized protein {ECO:0000313|EMBL:ONI02514.1};	--	GO:0005634,nucleus; GO:0003677,DNA binding; GO:0003700,DNA-binding transcription factor activity; GO:0009873,ethylene-activated signaling pathway; GO:0007275,multicellular organism development; GO:0006351,transcription, DNA-templated	AP2 domain
Transcriptional factors	PpARF17	Prupe.1G507000	2.98	3.58	3.43	2.9	2.66	3.03	23	22.93	23.58	2.7	2.96	2.93	3.23	4.14	4.09	4.89	4.92	4.65	5.05	5.02	5.16	Pp01	41847794	41852519	+	Prupe.1G507000	--	K14486 auxin response factor | (RefSeq) auxin response factor 1 (A)	auxin response factor 17 [Prunus persica]	RecName: Full=Auxin response factor 17;	RecName: Full=Auxin response factor {ECO:0000256|RuleBase:RU004561};	--	GO:0005634,nucleus; GO:0003700,DNA-binding transcription factor activity; GO:0000987,proximal promoter sequence-specific DNA binding; GO:0048830,adventitious root development; GO:0009653,anatomical structure morphogenesis; GO:0009734,auxin-activated signaling pathway; GO:0052543,callose deposition in cell wall; GO:0009555,pollen development; GO:0010208,pollen wall assembly; GO:0006355,regulation …	B3 DNA binding domain
Transcriptional factors	PpREM1	Prupe.8G122700	0.02	0	0.04	0.01	0.03	0	0.31	0.35	0.36	0	0.02	0.06	0.05	0	0.03	0	0	0	0	0	0.03	Pp08	14823514	14831809	+	Prupe.8G122700	--	--	hypothetical protein PRUPE_8G122700 [Prunus persica]	RecName: Full=B3 domain-containing protein Os01g0234100;	SubName: Full=Uncharacterized protein {ECO:0000313|EMBL:ONH91545.1};	--	GO:0005634,nucleus; GO:0003677,DNA binding; GO:0006355,regulation of transcription, DNA-templated; GO:0006351,transcription, DNA-templated	Protein of unknown function (DUF724)
Transcriptional factors	PpHAT4	Prupe.5G064300	2.01	2.66	2.56	2.91	2.72	3.09	19.97	20.3	20.41	3.84	4.16	4.55	4.18	4.36	4.32	8.12	7.7	8.79	4.99	4.21	6.87	Pp05	7821535	7824168	-	Prupe.5G064300	--	K09338 homeobox-leucine zipper protein | (RefSeq) homeobox-leucine zipper protein HAT4 (A)	homeobox-leucine zipper protein HAT4 [Prunus persica]	RecName: Full=Homeobox-leucine zipper protein HAT4; AltName: Full=HD-ZIP protein ATHB-2; AltName: Full=Homeodomain transcription factor ATHB-2; AltName: Full=Homeodomain-leucine zipper protein HAT4; Short=HD-ZIP protein 4;	SubName: Full=Uncharacterized protein {ECO:0000313|EMBL:EMJ10567.1};	Transcription factor HEX, contains HOX and HALZ domains	GO:0005634,nucleus; GO:0003700,DNA-binding transcription factor activity; GO:0042803,protein homodimerization activity; GO:0043565,sequence-specific DNA binding; GO:0008283,cell proliferation; GO:0045892,negative regulation of transcription, DNA-templated; GO:0010017,red or far-red light signaling pathway; GO:0009585,red, far-red light phototransduction; GO:0009733,response to auxin; GO:0009735,r…	Homeobox KN domain
Transcriptional factors	PpLBD4	Prupe.4G138200	1.92	1.97	2.45	3.26	2.44	3.78	35.5	36.16	34.44	2.07	2.97	2.76	4.97	5.38	5.56	4.49	5.34	3.1	4.79	4.83	3.94	Pp04	7693174	7696786	-	Prupe.4G138200	--	K13944 LOB domain-containing protein 16 | (RefSeq) LOB domain-containing protein 16 (A)	PREDICTED: LOB domain-containing protein 4 [Prunus mume]	RecName: Full=LOB domain-containing protein 4; AltName: Full=ASYMMETRIC LEAVES 2-like protein 6; Short=AS2-like protein 6;	SubName: Full=Uncharacterized protein {ECO:0000313|EMBL:EMJ13344.1};	--	--	Lateral organ boundaries (LOB) domain
Histone modification related genes	PpH2A.1	Prupe.6G322000	12.63	10.01	10.85	3.37	7.23	6.54	44.83	38.58	39.05	2.63	1.28	2.71	2.92	1.36	2.27	4.93	7.11	9.04	13.17	14.17	10.5	Pp06	28438258	28439020	+	Prupe.6G322000	--	K11251 histone H2A | (RefSeq) histone H2A.1 (A)	histone H2A.1 [Prunus persica]	RecName: Full=Histone H2A.1; AltName: Full=LeH2A-1;	RecName: Full=Histone H2A {ECO:0000256|RuleBase:RU003767};	Histone 2A	GO:0000790,nuclear chromatin; GO:0000786,nucleosome; GO:0003677,DNA binding; GO:0046982,protein heterodimerization activity; GO:0006342,chromatin silencing	Histone-like transcription factor (CBF/NF-Y) and archaeal histone
Histone modification related genes	PpH2AX	Prupe.8G250000	6.4	8.15	6.92	5.24	7.11	5.79	43.51	40.07	39.5	0.44	0.93	0.21	1.58	0.85	0.96	6	4.63	5.63	9.27	10.2	12.37	Pp08	21554579	21555422	+	Prupe.8G250000	--	K11251 histone H2A | (RefSeq) histone H2AX (A)	histone H2AX [Prunus persica]	RecName: Full=Histone H2AX;	RecName: Full=Histone H2A {ECO:0000256|RuleBase:RU003767};	Histone 2A	GO:0000786,nucleosome; GO:0005634,nucleus; GO:0003677,DNA binding; GO:0046982,protein heterodimerization activity	Histone-like transcription factor (CBF/NF-Y) and archaeal histone
Histone modification related genes	PpH2B	Prupe.6G113500	19.89	17.75	18.45	18.52	15.38	14.78	100.09	85.9	97.99	17.36	17.1	16.36	14.31	14.48	15.15	17.87	20.78	19.87	33.27	30.47	32.75	Pp06	8195589	8196428	+	Prupe.6G113500	--	K11252 histone H2B | (RefSeq) probable histone H2B.1 (A)	histone H2B [Hevea brasiliensis]	RecName: Full=Probable histone H2B.1;	RecName: Full=Histone H2B {ECO:0000256|RuleBase:RU000451};	Histone H2B	GO:0000786,nucleosome; GO:0005634,nucleus; GO:0003677,DNA binding; GO:0046982,protein heterodimerization activity	Transcription initiation factor TFIID subunit A
Histone modification related genes	PpH2B.3	Prupe.6G250100	7.52	6.16	5.04	2.7	4.43	3.46	23.03	18.27	18.24	1.55	2.44	1.87	7.61	4.46	4.2	7.67	6.87	7.43	2.8	2.43	2	Pp06	24548907	24549636	+	Prupe.6G250100	--	K11252 histone H2B | (RefSeq) probable histone H2B.3 (A)	probable histone H2B.3 [Prunus avium]	RecName: Full=Histone H2B;	RecName: Full=Histone H2B {ECO:0000256|RuleBase:RU000451};	Histone H2B	GO:0000786,nucleosome; GO:0005634,nucleus; GO:0003677,DNA binding; GO:0046982,protein heterodimerization activity	Transcription initiation factor TFIID subunit A
DNA methylation related genes	PpCMT3	Prupe.6G011600	2.91	3.5	2.82	1.9	1.76	1.9	18.72	20.25	19.88	0.55	0.57	0.32	0.54	0.32	0.52	2.27	1.48	1.82	5.17	5.17	5.03	Pp06	839936	847311	-	Prupe.6G011600	--	K00558 DNA (cytosine-5)-methyltransferase 1 [EC:2.1.1.37] | (RefSeq) DNA (cytosine-5)-methyltransferase CMT3 (A)	DNA (cytosine-5)-methyltransferase CMT3 [Prunus persica]	RecName: Full=DNA (cytosine-5)-methyltransferase CMT3; EC=2.1.1.37; AltName: Full=Chromomethylase 3; AltName: Full=Protein CHROMOMETHYLASE 3;	SubName: Full=Uncharacterized protein {ECO:0000313|EMBL:ONH99099.1};	--	GO:0005634,nucleus; GO:0003682,chromatin binding; GO:0003886,DNA (cytosine-5-)-methyltransferase activity; GO:0003677,DNA binding; GO:0006342,chromatin silencing; GO:0006306,DNA methylation; GO:0010425,DNA methylation on cytosine within a CNG sequence; GO:0051567,histone H3-K9 methylation; GO:0045814,negative regulation of gene expression, epigenetic; GO:0006351,transcription, DNA-templated; GO:0…	BAH domain
DNA methylation related genes	PpMET1	Prupe.7G183100	0.47	0.64	0.6	0.47	0.55	0.56	1.74	2.15	1.97	0.53	0.57	0.37	0.53	0.43	0.34	0.38	0.27	0.38	0.6	0.94	0.56	Pp07	17788128	17794244	-	Prupe.7G183100	--	K00558 DNA (cytosine-5)-methyltransferase 1 [EC:2.1.1.37] | (RefSeq) DNA (cytosine-5)-methyltransferase 1 (A)	DNA (cytosine-5)-methyltransferase 1 [Prunus persica]	RecName: Full=DNA (cytosine-5)-methyltransferase 1; EC=2.1.1.37; AltName: Full=DNA methyltransferase 01; AltName: Full=DNA methyltransferase 2; AltName: Full=DNA methyltransferase AthI; Short=DNA Metase AthI; Short=M.AthI; AltName: Full=DNA methyltransferase DDM2; AltName: Full=Protein DECREASED DNA METHYLATION 2;	RecName: Full=DNA (cytosine-5)-methyltransferase {ECO:0000256|PIRNR:PIRNR037404}; EC=2.1.1.37 {ECO:0000256|PIRNR:PIRNR037404};	--	GO:0005634,nucleus; GO:0003682,chromatin binding; GO:0003886,DNA (cytosine-5-)-methyltransferase activity; GO:0003677,DNA binding; GO:0008168,methyltransferase activity; GO:0016569,covalent chromatin modification; GO:0009294,DNA mediated transformation; GO:0010424,DNA methylation on cytosine within a CG sequence; GO:0010216,maintenance of DNA methylation; GO:0009910,negative regulation of flower …	BAH domain
Histone modification related genes	PpHDA14	Prupe.4G272300	5.77	5.51	5.31	6.28	5.96	6.71	1.96	1.86	2.2	10.36	9.41	8.35	7.87	7.3	7.51	7.68	8.36	8.14	15.88	14.48	13.81	Pp04	22392376	22400305	-	Prupe.4G272300	--	K11407 histone deacetylase 6 [EC:3.5.1.98] | (RefSeq) histone deacetylase 5 (A)	histone deacetylase 14 isoform X1 [Prunus persica]	RecName: Full=Histone deacetylase 14; EC=3.5.1.98;	RecName: Full=Histone deacetylase {ECO:0000256|SAAS:SAAS00894283}; EC=3.5.1.98 {ECO:0000256|SAAS:SAAS00894283};	Histone deacetylase complex, catalytic component HDA1	GO:0009507,chloroplast; GO:0005829,cytosol; GO:0005634,nucleus; GO:0043014,alpha-tubulin binding; GO:0048487,beta-tubulin binding; GO:0032041,NAD-dependent histone deacetylase activity (H3-K14 specific); GO:0051721,protein phosphatase 2A binding; GO:0043621,protein self-association; GO:0042903,tubulin deacetylase activity; GO:0006355,regulation of transcription, DNA-templated; GO:0006351,transcri…	Histone deacetylase domain
Histone modification related genes	PpSRT2	Prupe.4G275900	0.55	0.34	0.44	0.39	0.34	0.35	0	0	0.03	0.38	0.34	0.37	0.23	0.36	0.23	0.14	0.2	0.4	0.12	0.21	0.28	Pp04	23051318	23058428	-	Prupe.4G275900	--	K11414 NAD-dependent deacetylase sirtuin 4 [EC:3.5.1.-] | (RefSeq) NAD-dependent protein deacylase SRT2 isoform X1 (A)	NAD-dependent protein deacylase SRT2 isoform X1 [Prunus persica]	RecName: Full=NAD-dependent protein deacylase SRT2 {ECO:0000255|HAMAP-Rule:MF_03161}; EC=3.5.1.- {ECO:0000255|HAMAP-Rule:MF_03161}; AltName: Full=Regulatory protein SIR2 homolog 2 {ECO:0000255|HAMAP-Rule:MF_03161}; Flags: Precursor;	RecName: Full=NAD-dependent protein deacylase {ECO:0000256|HAMAP-Rule:MF_03161}; EC=3.5.1.- {ECO:0000256|HAMAP-Rule:MF_03161}; AltName: Full=Regulatory protein SIR2 homolog {ECO:0000256|HAMAP-Rule:MF_03161};	Sirtuin 4 and related class II sirtuins (SIR2 family)	GO:0005759,mitochondrial matrix; GO:0005634,nucleus; GO:0016787,hydrolase activity; GO:0046872,metal ion binding; GO:0070403,NAD+ binding; GO:0042742,defense response to bacterium; GO:0031348,negative regulation of defense response	Sir2 family

## Sheet: Table S7
	Table S7. Real-time quantitative PCR primers used in this study.
	Primer name	Primer sequence(5'-3')	References
	PpHDA14	F: CCATGGGTCATAACCAGGAGTC	[30]
		R:TGTCATTCGATGATGCTGCG
	PpCMT3	F:TAGTGAGGCTGATGTGGACC	[30]
		R:TCTAACAGGGCAGAGTTGGG
	PpTEF2	GGTGTGACGATGAAGAGTGATG	[34]
		TGAAGGAGAGGGAAGGTGAAAG
	PpbHLH123	F:AACCATGCCTTATTTCGTGGG	primers were designed from the NCBI
		R:GAGAAACCCCGGTTCATTTGC
	PpbHLH68	F:GACCTGAGGAGTAGGGGGTT	primers were designed from the NCBI
		R:TACTGGAAACCTCCGCCAAG
	PpDof1.4	F:CAGGTTTTGAGGGTGTTCGG	primers were designed from the NCBI
		R:TTCACACCTTGGGCACTTCA
	PpDof2.4	F:GGAGGAGATAACCAGTGGCG	primers were designed from the NCBI
		R:GCAGCCATAGGATCAGTCGG
	PpERF109	F:ATGCGATCCTCCTACAAGCG	primers were designed from the NCBI
		R:GGAGACGATGACGGTGAACT
	PpARR21	F:CAGCCAGGGACCAATAACCC	primers were designed from the NCBI
		R:CGACTGCCAATCAACTTCGC
	PpANL2	F:GTGTGGATGACCCTGGTGAG	primers were designed from the NCBI
		R:CCTCCTTGGGACTTGGCAAT
	PpLBD1	F:CGGATGCTACGCCGAAGATG	primers were designed from the NCBI
		R:TCTGAGCCTTGCTCTTGCTTC
	PpMYB114	F:GAAGCAAAGTGGAGCCAACC	primers were designed from the NCBI
		R:GGATGCAAAGCTAGCACCTTC
	PpRAX2	F:TGGCTTAACTATCTGCGCCC	primers were designed from the NCBI
		R:GGACCACCTGCTTCCAATGT
	PpMYB6	F:GGCAATTGGATTTCGCTCCC	primers were designed from the NCBI
		R:CCTGGCAGTTGGGATGCTAT
	PpLRP1	F:CGACGGTGAAAATTAGCGGG	primers were designed from the NCBI
		R:CTGGTGGAAGTCAGACAGGC
	PpSRS3	F:TGGTGATCGGAGGGCATGTA	primers were designed from the NCBI
		R:GAGCTGGAGCTTTGGCCTAC
	PpWRKY75	F:TGCTGTGAGGTTAGGGACGA	primers were designed from the NCBI
		R:GATGCGTGCACCGGTAGTAG
	PpPTI6	F:GCGAAGAACGAATCGTCGTG	primers were designed from the NCBI
		R:TCGGAACTTCTTCCCGTTCG
	PpAIL6	F:CAAGACTCGTCGTCCCTGAC	primers were designed from the NCBI
		R:CCGAATCCTCCACTTCCGAG
	PpARF17	F:GCTGGAGCAAGTTCGTCAAC	primers were designed from the NCBI
		R:TCAGCCTCATTGTGGTCGTC
	PpREM1	F:CAGAGAACCCTGAGCTTGTGT	primers were designed from the NCBI
		R:GCTTCGGCACATTTCTGGTT
	PpHAT4	F:GATCGTTCCTTCGGGGCATC	primers were designed from the NCBI
		R:TCTCGCCGTCTTCTTCATCG
	PpLBD4	F:CAGGATTGCGTGTTTGCTCC	primers were designed from the NCBI
		R:TACACCGGATCCCTCACTCT
